# Supplementary material for: Prenatal stress-induced programming of genome-wide promoter DNA methylation in 5-HTT-deficient mice
Source: PubMed Central journal article supplement — Transl Psychiatry. 2014 Oct 21;4(10):e473–. doi: 10.1038/tp.2014.107 (PMC4350514; doi:10.1038/tp.2014.107), 2014-10-21
Supplement: tp2014107x1.pdf [file tp2014107x1.pdf]

# **Prenatal stress-induced programming of genome-wide promoter DNA methylation in 5-HTT deficient mice**

Karla-Gerlinde Schraut, Sissi B Jakob, Magdalena T Weidner, Angelika G Schmitt, Claus J Scholz, Tatyana Strekalova, Nady El Hajj, Lars MT Eijssen, Katharina Domschke, Andreas Reif, Thomas Haaf, Gabriela Ortega, Harry WM Steinbusch, Klaus-Peter Lesch, Daniel L Van den Hove

## **Supplementary methods and material**

### **Methylated DNA immunoprecipitation followed by tiling array**

Genomic DNA was extracted from the tissue using phenol/chloroform/isoamyl alcohol extraction. 300 µl 0.5%-SDS extraction buffer were added to the frozen tissue. The tissue was subsequently homogenized for 30 to 60 sec at 25 Hz at 4°C in the Tissue Lyser (Qiagen, Hilden, Germany) using a metallic bead. After adding 200 µl 0.5%-SDS extraction buffer and 50 µl 10- or 20mg/µl-proteinase K, samples were incubated at 55°C overnight. Following this, samples were incubated with 50 µl 10mg/µl-RNase A with for 1 h at 37°C and then mixed with 700 µl of phenol/chloroform/isoamyl alcohol mixture (25:24:1). Phases were separated using MaXtract high density tubes (Qiagen) by centrifuging the samples at 14 000 rpm for 5 min at RT. The aqueous phase was then mixed with 700 µl phenol isoamyl alcohol (24:1) and phases were again separated by centrifuging the samples in MaXtract high density tubes as described above. DNA was precipitated with 50 µl sodium acetate and 1000 µl cold absolute ethanol (incubation 10 min at -20°C, centrifugation 20 min at 4°C, 14 000 rpm). The resulting pellet was washed with 500 µl cold 80%-ethanol using the same conditions as for the precipitation, dried at RT for 5 to 30 min and resuspended in 50 µl 1xTE. DNAs of 2-4 single animals were then pooled, creating 2-3 pools per group.

To gain fragments of 300 +/- 200 bp size, DNA was sheared using the Biorupter™ UCD-200 (Diagenode, Liège, Belgium). Conditions were 20 KHz, 30 sec ON alternated by 30 sec OFF, for 3 x 5 min at low power. Efficiency of the shearing was checked with the Bioanalyzer 2100 (Agilent, Santa Clara, California, USA).

Methyl DNA immunoprecipitation (MeDIP, Diagenode) using an antibody against 5-methylcytosine was performed as described in the Diagenode manual. IP samples were performed in duplicate, input sample once. 1000 ng of DNA were used for each IP and 100 ng for the input. DNA was then purified using IPure (Diagenode) according to the manufacturer's manual and the resulting IP DNA samples belonging together were pooled. Pooled IP DNA and input DNA was then amplified using two-step Whole Genome Amplification (GenomePlex Kit, Sigma, St. Louis, USA). Amplification, labeling, hybridization, and the actual tiling analysis were performed by the Interdisciplinary Centre for Clinical Research (IZKF) at the University of Wuerzburg. 7.5 µg DNA from the second amplification round were fragmented and labeled using the GeneChip 10K Xba Assay Kit (Affymetrix, Santa Clara, California, USA). The size of the obtained biotinylated cDNA fragments was checked with the Bioanalyzer (Agilent) and ranged between 25 and 250 bp (peak at 100 bp). Hybridization to GeneChip<sup>®</sup> Mouse Promoter 1.0R Arrays and washing using the GeneChip<sup>®</sup> Expression Wash, Stain and Scan Kit (Affymetrix) was performed as described in the Affymetrix manuals. Arrays were scanned with the GeneChip<sup>®</sup> Scanner 3000 (Affymetrix). The promoter tiling array used in this study is comprised of over 4.6 million probes tiled to interrogate over 28,000 mouse promoter regions. Each promoter region covers approximately 6 kb upstream through 2.5 kb downstream of 5' transcription start sites. The probes are tiled at an average resolution of 35 bp, leaving a gap of approximately 10 bp between probes.

### **Evaluation of MeDIP-chip data**

Affymetrix quality metrics and visual inspection of overall microarray signals confirmed high-quality readout from the hybridized samples. Genomic locations of microarray probes were adjusted to the *Mus musculus* NCBI assembly version 37.1 (MMv37 thereafter). Probe signals from corresponding MeDIP and input samples were subjected to within-sample pairwise loess normalization and calculation of MeDIP-input signal log<sub>2</sub> ratios (SLRs). Quantile normalization was employed to ensure a common signal distribution between samples. To decrease the noise in the experiment readout, a sliding-window

approach was applied to determine SLR medians in successive genomic regions of 300 bp width. The SLRs were then found to be free from biases introduced by varying probe GC content and particular probe sequence compositions (data not shown), thus confirming successful data normalization. A correspondence analysis further confirmed the absence of extreme outliers in samples and/or SLRs.

In each sample, genomic regions enriched by the MeDIP procedure were detected by the CMARRT algorithm.<sup>1</sup> Briefly, this does not apply a fixed threshold to all SLRs, but rather tests for increased signal content correcting for the signal autocorrelation in considered genomic regions, resulting in higher sensitivity and specificity of the detected enriched regions. For CMARRT modeling, the typical fragment length after DNA sonication was assumed to be 300 bp; enriched regions were required to cover at least five consecutive array probes and to display an enrichment statistic with a false discovery rate (FDR) less than 0.05. Of all detected regions, only those were retained in the analysis that were consistently found within each analysis group. With the present (=1) and absent (=0) calls for MeDIP enrichment, effect directions were determined as previously described.<sup>2</sup> Briefly, genotype (G) effect directions (d) were calculated by

$$G_d = ( (5-Htt+/- C + 5-Htt+/- PS) - (5-Htt+/+ C + 5-Htt+/+ PS) ) * 0.5,$$

environment (E) effect directions by

$$E_d = ( (5-Htt+/+ PS + 5-Htt+/- PS) - (5-Htt+/+ C + 5-Htt+/- C) ) * 0.5$$

and interaction (GxE) effect directions by

$$GxE_d = ( (5-Htt+/- PS - 5-Htt+/- C) - (5-Htt+/+ PS - 5-Htt+/+ C) ) * 0.5.$$

Effect directions for regions with inconclusive effect size (i.e. with absolute values less than 1) were set to zero. To obtain log<sub>2</sub> fold changes (logFCs) quantifying the change of microarray signal for each effect described above, we first summarized data from probes localized inside the regions defined by CMARRT

and of all samples of the same group to determine the median SLR per region and group. With these, we calculated “raw” logFCs (RlogFC) according to the aforementioned formulas. We observed that for a few regions, RlogFCs and effect (Eff) directions were not consistent (i.e. positive  $d_{Eff}$  and negative RlogFC or *vice versa*); therefore, RlogFCs were corrected according to the formula

$$\log FC_{Eff} = RlogFC_{Eff} * \begin{cases} 1, & \text{if } d_{Eff} * RlogFC_{Eff} > 0 \\ 0, & \text{if } d_{Eff} * RlogFC_{Eff} < 0 \end{cases}$$

to obtain the logFC for each region and effect. Thus, whenever the RlogFC is not consistent with the effect direction, the logFC is set to zero; in turn, regions with non-zero logFC for the G, E or GxE effect display a conclusive effect direction which is concordant with the observed median signal change.

Preprocessing and analysis of Affymetrix tiling arrays was performed with R v2.15 along with the Bioconductor package Starr.<sup>3</sup> The package ChIPpeakAnno<sup>4</sup> was used for annotation of enriched regions.

### **Differentially methylated regions (DMRs)**

No “cut off” value for the fold change (FC) was applied. A FC of 1 indicates no change whereas a FC of 2 indicates a double amount of methylation. For optimizing discrimination of DMRs associated with the same gene, a unique DMR identification number (ID) was assigned to each DMR. Sometimes, more than one gene was annotated to one DMR.

### **Functional Annotation Clustering**

Functional Annotation Clustering is an enrichment analysis that clusters functionally similar annotations (terms) associated with user’s gene list into groups provided by DAVID<sup>5, 6</sup>. We performed Functional Annotation Clustering on our DMRs in order to gain insight into which annotation groups are enriched in our DMRs lists.

### **Validation of methylation data using Pyrosequencing and MeDIP-qPCR**

The validity of the methylation data obtained from the promoter microarray was tested using Pyrosequencing® and MeDIP quantitative real-time PCR (MeDIP-qPCR). For Pyrosequencing, 400 ng of genomic DNA were treated with sodium bisulfite as described in the manufacturer's instruction using a standard PCR cycler (EZ DNA Methylation-Gold™ Kit by Zymo, Irvine, California, USA). The product was purified using Zymo-Spin™ IC Columns (Zymo Research). The desired PCR products were amplified using the HotStar Taq Plus DNA polymerase (Qiagen) and subsequently sequenced using the PyroMark Q96 MD™ Pyrosequencer (Biotage, Uppsala, Sweden) and PyroMark Gold Q96 CDT reagents (Qiagen). The PCR and the sequencing primers were designed with the PyroMark Assay Design 2.0 Software (Qiagen). The percentage of unconverted cytosines of single CpG sites was assessed using the Pyro Q-CpG™ Software (Qiagen).

For MeDIP-qPCR, the same MeDIP DNA as applied to the array was used for qPCR. qPCR was performed as described in the Diagenode MeDIP manual. qPCR was performed on the Bio-Rad CFX384 Real-Time PCR Detection System (in technical triplicates).

Statistics on pyrosequencing and MeDIP data were performed using IBM SPSS Statistics. Differences were considered significant when  $p < 0.05$ .

### **Gene expression data and overlap with methylation data**

In addition to focusing solely on differential DNA methylation, DMRs were also assessed in view of gene expression changes, the latter of which were previously examined in the same animals.<sup>2</sup> For this purpose, we identified genes that were both differentially methylated and differentially expressed in our *5-Htt* x PS paradigm. The expression array did not cover miRNAs, hence, no gene expression data from the expression array are available for miRNAs. Gene expression microarray results were validated using reverse transcription quantitative real-time PCR (RT-qPCR) as described in detail previously.<sup>2</sup> In brief, cDNA synthesis was performed using the iScript™ kit (Bio-Rad, Munich, Germany) according to the

manufacturer's instructions. qPCR was performed on the Bio-Rad CFX384 Real-Time PCR Detection System (in technical triplicates). Mean efficiencies were calculated by LinReg.<sup>7</sup> Normalization and calculation of the relative expression was performed using qBase (Biogazelle, Zwijnaarde, Belgium).<sup>8</sup> *CCCTC-binding factor (Ctcf)*, *guanosine diphosphate (GDP) dissociation inhibitor 2 (Gdi2)* and *Smad nuclear interacting protein 1 (Snip1)* were used for normalization. M-values were  $M < 0.103$ .

### Modulated Modularity Clustering (MMC)

We performed a Modulated Modularity Clustering (MMC)<sup>9</sup> with a subset of myelin-associated genes from the previously published gene expression array data<sup>2</sup> in order to identify clusters of myelin-associated genes that correlated in expression. The myelin-associated genes set was a compound category consisting of the gene ontologies GO:0004767, GO:0006684, GO:0006686, GO:0016230, GO:0016277, GO:0019911, GO:0022010, GO:0031641, GO:0031642, GO:0031643, GO:0032286, GO:0032288, GO:0032289, GO:0042552, GO:0043209, GO:0043217, GO:0043218, GO:0047157, GO:2000754 and GO:2000755.

### Primer sequences:

| RT-qPCR Primer         | Mod. | Sequence             | Product size (bp) | Genomic location in NCBIM37/mm9 |
|------------------------|------|----------------------|-------------------|---------------------------------|
| <u>Gene expression</u> |      |                      |                   |                                 |
| RT_Mbp_F               |      | CTCCCTGCCCCAGAAGTC   | 95                |                                 |
| RT_Mbp_R               |      | GAGGTGGTGTTCGAGGTGTC |                   |                                 |
| RT_Mbp_ex1/3_F         |      | ACAGAGACACGGGCATCCT  | 90                |                                 |
| RT_Mbp_ex1/3_R         |      | TGTGTGAGTCCTTGCCAGAG |                   |                                 |
| RT_Mbp_ex1/2_F         |      | ACAGAGACACGGGCATCCT  | 89                |                                 |
| RT_Mbp_ex1/2_R         |      | CCAGGGTACCTTGCCAGAG  |                   |                                 |
| RT_Plp1_F              |      | AGGCCAACATCAAGCTCATT | 82                |                                 |
| RT_Plp1_R              |      | CAAACACCAGGAGCCATACA |                   |                                 |
| RT_Mag_F               |      | TTCTCAGGGGGAGACAACC  | 123               |                                 |
| RT_Mag_R               |      | ACTCTCCTGGGGCTCTCAGT |                   |                                 |
| RT_Mog_F               |      | CTGGCAGGACAGTTTCTTGA | 113               |                                 |
| RT_Mog_R               |      | AAAGAGGCCAATGGGAAATC |                   |                                 |
| RT_Sox10_F             |      | ATGTCAGATGGGAACCCAGA | 88                |                                 |

|            |                           |     |
|------------|---------------------------|-----|
| RT_Sox10_R | CGGACTGCAGCTCTGTCTTT      |     |
| RT_Ctcf_F  | ACACCCATGTGAAAAATCCTG     | 105 |
| RT_Ctcf_R  | CAGAGCAAAGAAAATGTTGATGAG  |     |
| RT_Gdi2_F  | GTCAGAATTGGTTGGTTCTGTTC   | 126 |
| RT_Gdi2_R  | AGCTCTTGGATCACACAATCG     |     |
| RT_Snip1_F | CGTGGCTTCTACCAACAGG       | 129 |
| RT_Snip1_R | CAAAGCTAAAGAAAAAGACCAGATG |     |

#### Mbp MeDIP

|                   |                      |     |                          |
|-------------------|----------------------|-----|--------------------------|
| MeDIP Mbp forward | TGGCTAGTGCTTGTTCCTGA | 119 | chr18: 82694078-82694196 |
| MeDIP Mbp reverse | GTGCATGTGTGAGGGTGACT |     |                          |

#### Pyrosequencing Bisulfite-PCR Primer

---

|             |        |                               |     |                          |
|-------------|--------|-------------------------------|-----|--------------------------|
| PP-Mbp-A-F  |        | AGTATTTAGGGTAAGGTATGGTATAGA   | 250 | chr18: 82693519-82693769 |
| PP-Mbp-A-Rb | Biotin | ATTC AACCTCTAACATAACAAAATATCA |     |                          |
| PP-Mbp-B-F  |        | GAGGTTGAATTTAGGAGTTGAATATATG  | 214 | chr18: 82693760-82693972 |
| PP-Mbp-B-Rb | Biotin | AAAAAAAATACTCACAAAACCTCTTATA  |     |                          |
| PP-Mbp-C-F  |        | TTTGATTGAAGGTAGAATAATGTAGAAG  | 193 | chr18: 82694026-82694219 |
| PP-Mbp-C-Rb | Biotin | ACTCACCAACACCAATATAAATTATACA  |     |                          |

#### Pyrosequencing Sequencing Primer

---

|                   |                          |
|-------------------|--------------------------|
| Seq-Mbp-A-CG3     | GTATTGTGTTTAGGATGG       |
| Seq-Mbp-A-CG4     | ATATTTATATATATAGAGGAGTAT |
| Seq-Mbp-A-CG5-6   | GGTATTAAGGGAAGGTATAA     |
| Seq-Mbp-B-CG7     | ATGTTTAAGTGATTGTTTTATTAT |
| Seq-Mbp-B-CG8     | GAGTTGTGGTATTAGTTTTAA    |
| Seq-Mbp-B-CG9     | GATAGTAGTTTTTGTGTAATATTG |
| Seq-Mbp-C-CG10    | AGGTAGAATAATGTAGAAGTT    |
| Seq-Mbp-C-CG11-13 | TTTTTGAGGTTTGGGAT        |
| Seq-Mbp-C-CG14-15 | GTGGTATGAAGGTATTTTAG     |

#### References

1. Kuan PF, Chun H, Keles S. CMARRT: a tool for the analysis of ChIP-chip data from tiling arrays by incorporating the correlation structure. *Pacific Symposium on Biocomputing Pacific Symposium on Biocomputing 2008*: 515-526.
2. van den Hove DL, Jakob SB, Schraut KG, Kenis G, Schmitt AG, Kneitz S, *et al.* Differential effects of prenatal stress in 5-Htt deficient mice: towards molecular mechanisms of gene x environment interactions. *PLoS one* 2011; **6**(8): e22715.

3. Zacher B, Kuan PF, Tresch A. Starr: Simple Tiling ARRAY analysis of Affymetrix ChIP-chip data. *BMC bioinformatics* 2010; **11**: 194.
4. Zhu LJ, Gazin C, Lawson ND, Pages H, Lin SM, Lapointe DS, *et al.* ChIPpeakAnno: a Bioconductor package to annotate ChIP-seq and ChIP-chip data. *BMC bioinformatics* 2010; **11**: 237.
5. Huang da W, Sherman BT, Lempicki RA. Systematic and integrative analysis of large gene lists using DAVID bioinformatics resources. *Nature protocols* 2009; **4**(1): 44-57.
6. Huang da W, Sherman BT, Lempicki RA. Bioinformatics enrichment tools: paths toward the comprehensive functional analysis of large gene lists. *Nucleic acids research* 2009; **37**(1): 1-13.
7. Ruijter JM, Ramakers C, Hoogaars WM, Karlen Y, Bakker O, van den Hoff MJ, *et al.* Amplification efficiency: linking baseline and bias in the analysis of quantitative PCR data. *Nucleic acids research* 2009; **37**(6): e45.
8. Hellemans J, Mortier G, De Paepe A, Speleman F, Vandesompele J. qBase relative quantification framework and software for management and automated analysis of real-time quantitative PCR data. *Genome biology* 2007; **8**(2): R19.
9. Stone EA, Ayroles JF. Modulated modularity clustering as an exploratory tool for functional genomic inference. *PLoS genetics* 2009; **5**(5): e1000479.



## Supplementary Figures

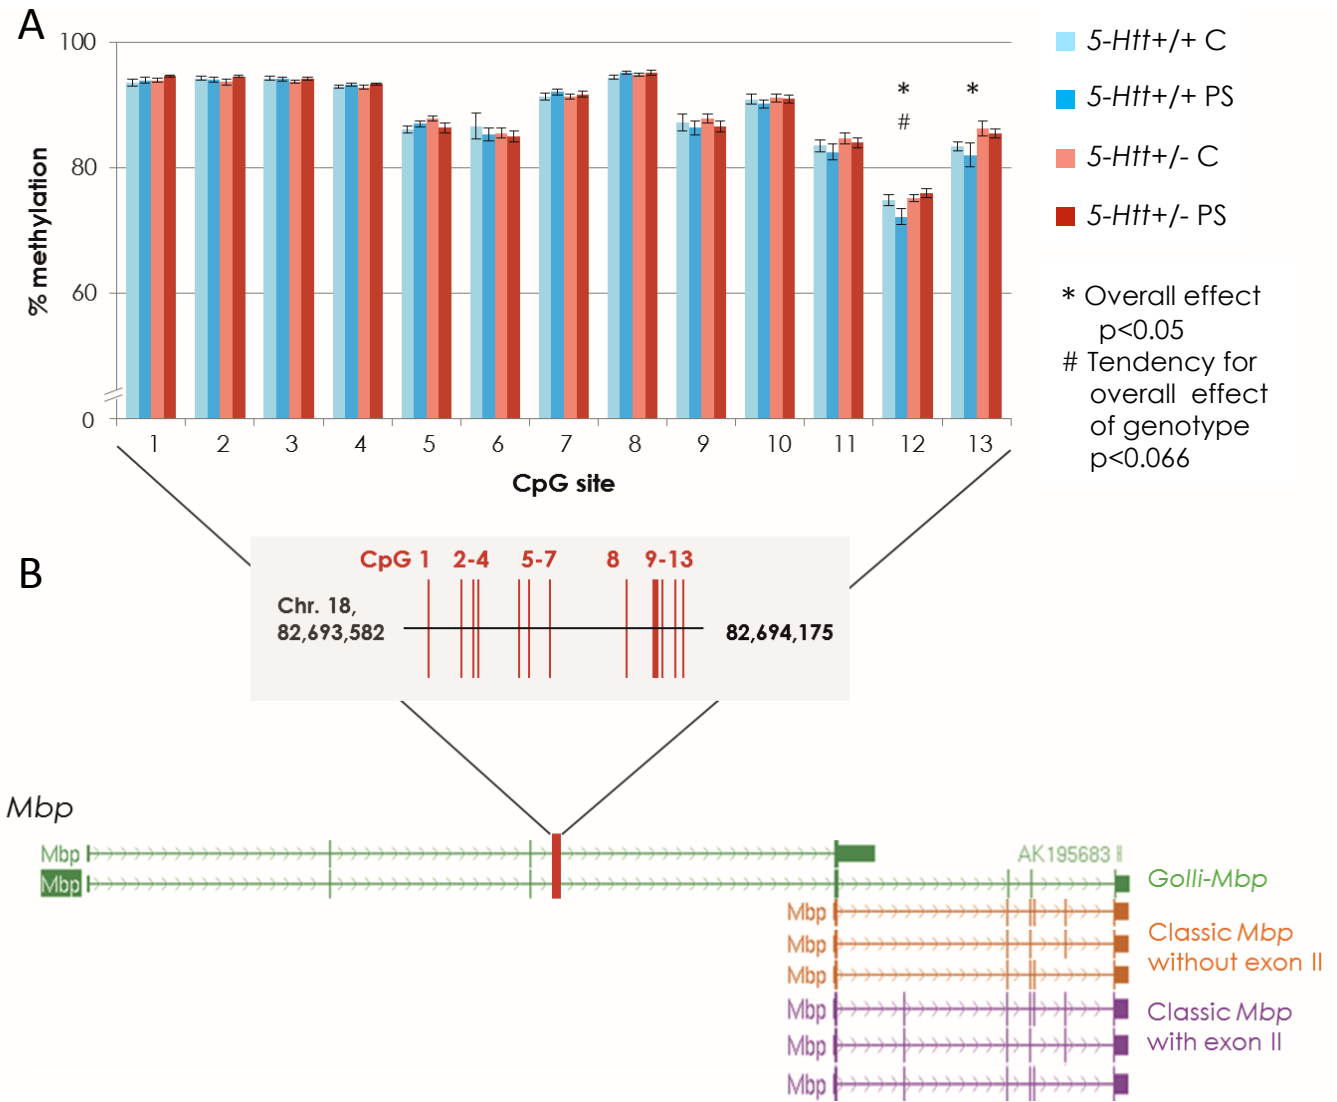

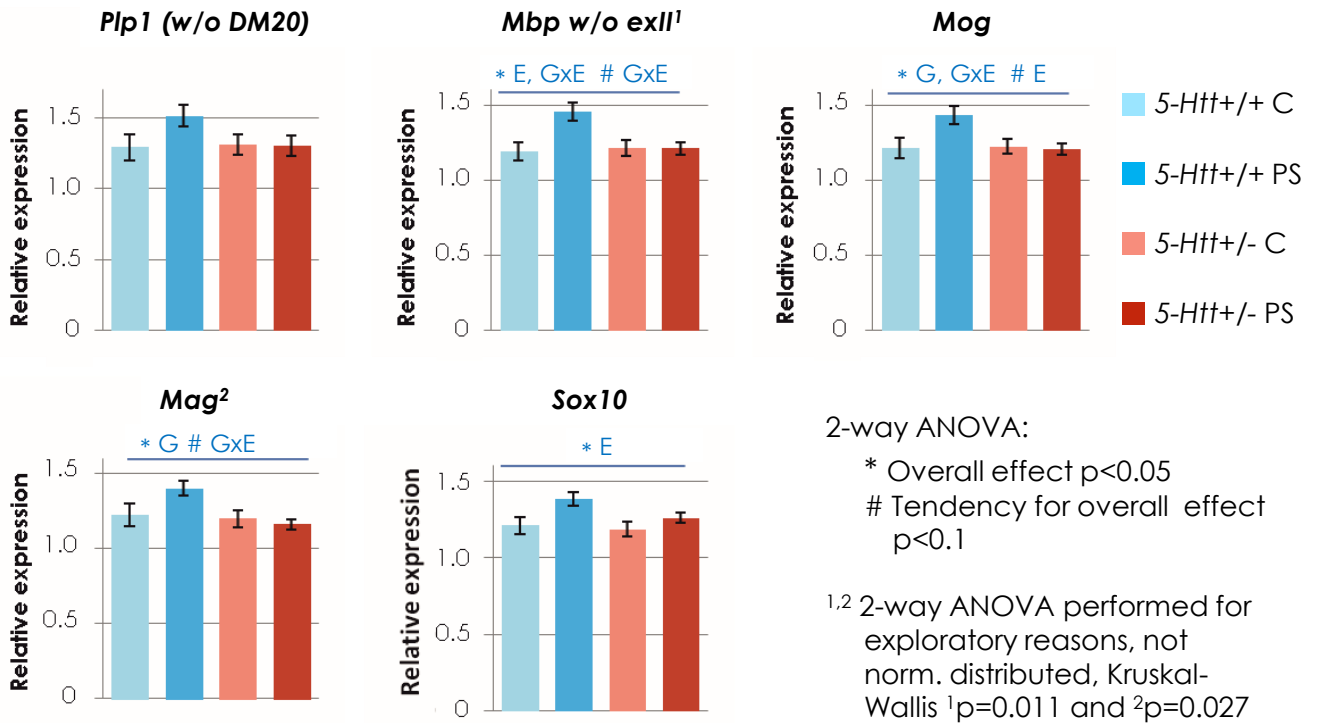

**Supplementary Figure 2.** Expression of myelin-associated genes in the hippocampus of female 5-Htt+/- or 5-Htt+/+ mice exposed to prenatal stress (PS) or not (control, C) obtained by RT-qPCR. Bars representing means, error bars representing SEM.

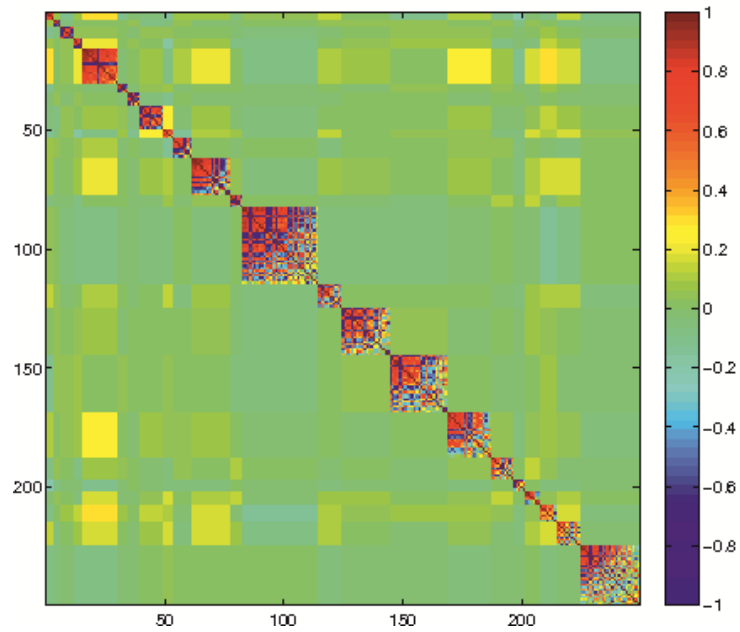

**Supplementary Figure 3.** Clusters of highly correlating genes identified using Modulatory Modularity Cluster (MMC) analysis on differentially expressed myelin-associated genes in the hippocampus of female *5-Htt+/-* and *5-Htt+/+* mice, exposed to prenatal stress or not (control). Dark red indicates a correlation of 1, violet-blue indicates a correlation of -1. See Supplementary Table 4 for details on the clusters.

## Supplementary Tables

### Supplementary Table 1

Differentially methylated regions in the hippocampus of female *5-Htt+/-* or *5-Htt+/+* mice exposed to prenatal stress (PS) or not (control, C), identified by applying enriched methylated DNA (MeDIP) to a promoter tiling array. FC = Fold change, Chr. = Chromosome, G = genotype (5-Htt), E = environment (PS), GxE = gene x environment interaction.

#### A) G-effects

| reg. ID | Chr. | start     | end       | width | Enrichment meDNA |     |          |    | effect dir. | logFC | ENSEMBL ID                                  | symbol                      | gene name                                                                                                                              | next miRNA               |
|---------|------|-----------|-----------|-------|------------------|-----|----------|----|-------------|-------|---------------------------------------------|-----------------------------|----------------------------------------------------------------------------------------------------------------------------------------|--------------------------|
|         |      |           |           |       | 5-Htt+/+         |     | 5-Htt+/- |    |             |       |                                             |                             |                                                                                                                                        |                          |
|         |      |           |           |       | C                | PS  | C        | PS |             |       |                                             |                             |                                                                                                                                        |                          |
| 905     | 12   | 111082441 | 111082607 | 167   | Yes              | Yes | No       | No | ↓           | -0.83 | ENSMUSG00000065497                          | Mir410                      | microRNA 410                                                                                                                           | downstream mmu-mir-3072  |
| 715     | 11   | 104048702 | 104048948 | 247   | Yes              | Yes | No       | No | ↓           | -0.42 | ENSMUSG00000049506                          | 4933407P14Rik               | RIKEN cDNA 4933407P14 gene                                                                                                             | downstream mmu-mir-3064  |
| 866     | 12   | 87088511  | 87088795  | 285   | Yes              | Yes | No       | No | ↓           | -0.42 | ENSMUSG00000034258                          | Mfsd7c                      | major facilitator superfamily domain containing 7C                                                                                     | downstream mmu-mir-3068  |
| 3459    | 6    | 145752604 | 145752976 | 373   | Yes              | Yes | No       | No | ↓           | -0.40 | ENSMUSG00000045110 //<br>ENSMUSG00000030259 | Rassf8 // Rassf8            | Ras association (RalGDS/AF-6) domain family (N-terminal) member 8 // Ras association (RalGDS/AF-6) domain family (N-terminal) member 8 | downstream mmu-mir-680-1 |
| 2803    | 4    | 97188366  | 97188799  | 434   | Yes              | Yes | No       | No | ↓           | -0.36 | ENSMUSG00000084159                          | Gm12696                     | predicted gene 12696                                                                                                                   | downstream mmu-mir-872   |
| 2882    | 4    | 135054667 | 135055125 | 459   | Yes              | Yes | No       | No | ↓           | -0.35 | ENSMUSG00000028801                          | 4930555121Rik               | RIKEN cDNA 4930555121 gene                                                                                                             | upstream mmu-mir-700     |
| 2066    | 19   | 44595070  | 44595399  | 330   | Yes              | Yes | No       | No | ↓           | -0.35 | ENSMUSG00000051984                          | Sec31b                      | Sec31 homolog B ( <i>S. cerevisiae</i> )                                                                                               | downstream mmu-mir-5114  |
| 1830    | 18   | 14133191  | 14133387  | 197   | Yes              | Yes | No       | No | ↓           | -0.33 | ENSMUSG00000024420                          | Zfp521                      | zinc finger protein 521                                                                                                                | downstream mmu-mir-1948  |
| 3754    | 8    | 26825162  | 26825534  | 373   | Yes              | Yes | No       | No | ↓           | -0.33 | ENSMUSG00000031570 //<br>ENSMUSG00000054823 | Ppapdc1b //<br>Whsc11       | phosphatidic acid phosphatase type 2 domain containing 1B // Wolf-Hirschhorn syndrome candidate 1-like 1 (human)                       | upstream mmu-mir-3107    |
| 817     | 12   | 57474440  | 57474780  | 341   | Yes              | Yes | No       | No | ↓           | -0.32 | ENSMUSG00000066491                          | Mbip // Gm6265              | MAP3K12 binding inhibitory protein 1 // predicted pseudogene 6265                                                                      | upstream mmu-mir-1892    |
| 2658    | 3    | 144760299 | 144760468 | 170   | Yes              | Yes | No       | No | ↓           | -0.31 | ENSMUSG00000036960                          | Clca5                       | chloride channel calcium activated 5                                                                                                   | downstream mmu-mir-3963  |
| 3694    | 7    | 144142703 | 144143056 | 354   | Yes              | Yes | No       | No | ↓           | -0.31 | ENSMUSG00000054612                          | Mgmt                        | O-6-methylguanine-DNA methyltransferase                                                                                                | downstream mmu-mir-1962  |
| 3747    | 8    | 24774416  | 24774684  | 269   | Yes              | Yes | No       | No | ↓           | -0.31 | ENSMUSG00000037492                          | Zmat4                       | zinc finger, matrin type 4                                                                                                             | upstream mmu-mir-3107    |
| 1832    | 18   | 14998503  | 14998709  | 207   | Yes              | Yes | No       | No | ↓           | -0.30 | ENSMUSG00000054321                          | Taf4b                       | TAF4B RNA polymerase II, TATA box binding protein (TBP)-associated factor                                                              | downstream mmu-mir-1948  |
| 978     | 13   | 47028519  | 47029667  | 1149  | Yes              | Yes | No       | No | ↓           | -0.30 | ENSMUSG00000021375                          | Kif13a                      | kinesin family member 13A                                                                                                              | downstream mmu-let-7d    |
| 2743    | 4    | 43675169  | 43675597  | 429   | Yes              | Yes | No       | No | ↓           | -0.30 | ENSMUSG00000043770 //<br>ENSMUSG00000043633 | Gm12481 //<br>4930412F15Rik | predicted gene 12481 // RIKEN cDNA 4930412F15 gene                                                                                     | downstream mmu-mir-5106  |
| 2918    | 4    | 141799878 | 141800129 | 252   | Yes              | Yes | No       | No | ↓           | -0.30 | ENSMUSG00000040606                          | Kazn                        | kazrin, perioplakin interacting protein                                                                                                | upstream mmu-mir-2139    |
| 3426    | 6    | 128393132 | 128393439 | 308   | Yes              | Yes | No       | No | ↓           | -0.29 | ENSMUSG00000059659                          | Gm10069                     | predicted gene 10069                                                                                                                   | upstream mmu-mir-680-1   |
| 2581    | 3    | 101089733 | 101090209 | 477   | Yes              | Yes | No       | No | ↓           | -0.29 | ENSMUSG00000027863                          | Cd2                         | CD2 antigen                                                                                                                            | downstream mmu-mir-190b  |
| 2994    | 5    | 41813062  | 41813495  | 434   | Yes              | Yes | No       | No | ↓           | -0.28 | ENSMUSG00000029128                          | Rab28                       | RAB28, member RAS oncogene family                                                                                                      | downstream mmu-mir-3097  |
| 286     | 10   | 24285458  | 24285641  | 184   | Yes              | Yes | No       | No | ↓           | -0.27 | ENSMUSG00000081259                          | Gm6893                      | predicted gene 6893                                                                                                                    | downstream mmu-mir-5104  |
| 885     | 12   | 103945451 | 103945656 | 206   | Yes              | Yes | No       | No | ↓           | -0.27 | ENSMUSG00000057963                          | Itpk1                       | iNositol 1,3,4-triphosphate 5/6 kinase                                                                                                 | upstream mmu-mir-1936    |
| 3958    | 9    | 30231240  | 30231969  | 730   | Yes              | Yes | No       | No | ↓           | -0.26 | ENSMUSG00000031993                          | Snx19                       | sorting nexin 19                                                                                                                       | upstream mmu-mir-1946b   |

| reg. ID | Chr. | start     | end       | width | Enrichment meDNA |     |          |    | effect dir. | logFC | ENSEMBL ID                                                           | symbol             | gene name                                                                                    | next miRNA               |
|---------|------|-----------|-----------|-------|------------------|-----|----------|----|-------------|-------|----------------------------------------------------------------------|--------------------|----------------------------------------------------------------------------------------------|--------------------------|
|         |      |           |           |       | 5-Htt+/+         |     | 5-Htt+/- |    |             |       |                                                                      |                    |                                                                                              |                          |
|         |      |           |           |       | C                | PS  | C        | PS |             |       |                                                                      |                    |                                                                                              |                          |
| 3683    | 7    | 140975216 | 140978199 | 2984  | Yes              | Yes | No       | No | ↓           | -0.25 | ENSMUSG00000030986 //<br>ENSMUSG00000053111                          | Dhx32 // Fank1     | DEAH (Asp-Glu-Ala-His) box polypeptide 32 // fibronectin type 3 and ankyrin repeat domains 1 | upstream mmu-mir-1962    |
| 781     | 12   | 9030965   | 9031131   | 167   | Yes              | Yes | No       | No | ↓           | -0.25 | ENSMUSG00000066637 //<br>ENSMUSG00000066643                          | Ttc32 // Wdr35     | tetratricopeptide repeat domain 32 // WD repeat domain 35                                    | upstream mmu-mir-3066    |
| 1266    | 14   | 77434538  | 77434857  | 320   | Yes              | Yes | No       | No | ↓           | -0.25 | ENSMUSG00000044350                                                   | 9030625A04Rik      | RIKEN cDNA 9030625A04 gene                                                                   | downstream mmu-mir-1971  |
| 3938    | 9    | 15414614  | 15414891  | 278   | Yes              | Yes | No       | No | ↓           | -0.25 | ENSMUSG00000039977                                                   | Ccdc67             | coiled-coil domain containing 67                                                             | downstream mmu-mir-1900  |
| 678     | 11   | 98046669  | 98047229  | 561   | Yes              | Yes | No       | No | ↓           | -0.25 | ENSMUSG00000083408 //<br>ENSMUSG00000059399 //<br>ENSMUSG00000018160 | --- // --- // Med1 | NA // NA // mediator complex subunit 1                                                       | upstream mmu-mir-5119    |
| 3110    | 5    | 106641725 | 106641886 | 162   | Yes              | Yes | No       | No | ↓           | -0.24 | ENSMUSG00000065942                                                   | ---                | NA                                                                                           | downstream mmu-mir-5619  |
| 4023    | 9    | 63445313  | 63445733  | 421   | Yes              | Yes | No       | No | ↓           | -0.24 | ENSMUSG00000037801                                                   | lqch               | IQ motif containing H                                                                        | upstream mmu-mir-5133    |
| 3236    | 5    | 151251871 | 151252034 | 164   | Yes              | Yes | No       | No | ↓           | -0.23 | ENSMUSG00000075527 //<br>ENSMUSG00000056602                          | --- // Fry         | NA // furry homolog (Drosophila)                                                             | downstream mmu-mir-5105  |
| 953     | 13   | 30080878  | 30081078  | 201   | Yes              | Yes | No       | No | ↓           | -0.23 | ENSMUSG00000016477                                                   | E2f3               | E2F transcription factor 3                                                                   | upstream mmu-mir-1983    |
| 1377    | 15   | 68711062  | 68711326  | 265   | Yes              | Yes | No       | No | ↓           | -0.23 | ENSMUSG00000070713                                                   | Gm10282            | predicted pseudogene 10282                                                                   | upstream mmu-mir-30d     |
| 2247    | 2    | 76823368  | 76823897  | 530   | Yes              | Yes | No       | No | ↓           | -0.22 | ENSMUSG00000051747                                                   | Ttn                | titin                                                                                        | downstream mmu-mir-10b   |
| 1663    | 17   | 9966375   | 9966701   | 327   | Yes              | Yes | No       | No | ↓           | -0.22 | ENSMUSG00000046173                                                   | Pabpc6             | poly(A) binding protein, cytoplasmic 6                                                       | upstream mmu-mir-692-1   |
| 2900    | 4    | 138745073 | 138745267 | 195   | Yes              | Yes | No       | No | ↓           | -0.22 | ENSMUSG00000028745                                                   | Capzb              | capping protein (actin filament) muscle Z-line, beta                                         | downstream mmu-mir-2139  |
| 162     | 1    | 161971697 | 161972159 | 463   | Yes              | Yes | No       | No | ↓           | -0.22 | ENSMUSG00000050883                                                   | 4930523C07Rik      | RIKEN cDNA 4930523C07 gene                                                                   | downstream mmu-mir-1927  |
| 1813    | 17   | 87847957  | 87848387  | 431   | Yes              | Yes | No       | No | ↓           | -0.21 | ENSMUSG00000036438                                                   | Calm2              | calmodulin 2                                                                                 | upstream mmu-mir-1195    |
| 3415    | 6    | 124859259 | 124859495 | 237   | Yes              | Yes | No       | No | ↓           | -0.21 | ENSMUSG00000030124                                                   | Lag3               | lymphocyte-activation gene 3                                                                 | upstream mmu-mir-200c    |
| 1824    | 18   | 7581833   | 7582518   | 686   | Yes              | Yes | No       | No | ↓           | -0.21 | ENSMUSG00000062196 //<br>ENSMUSG00000057440                          | --- // Mpp7        | NA // membrane protein, palmitoylated 7 (MAGUK p55 subfamily member 7)                       | upstream mmu-mir-1893    |
| 2319    | 2    | 131635333 | 131635779 | 447   | Yes              | Yes | No       | No | ↓           | -0.21 | ENSMUSG00000081422                                                   | Gm14282            | predicted gene 14282                                                                         | downstream mmu-mir-103-2 |
| 706     | 11   | 102111877 | 102112086 | 210   | Yes              | Yes | No       | No | ↓           | -0.21 | ENSMUSG00000034773                                                   | BC030867           | cDNA sequence BC030867                                                                       | downstream mmu-mir-5119  |
| 3571    | 7    | 78493992  | 78494308  | 317   | Yes              | Yes | No       | No | ↓           | -0.20 | ENSMUSG00000070511                                                   | Gm10295            | predicted gene 10295                                                                         | downstream mmu-mir-211   |
| 3640    | 7    | 125885124 | 125885620 | 497   | Yes              | Yes | No       | No | ↓           | -0.20 | ENSMUSG00000030982                                                   | 9030624J02Rik      | RIKEN cDNA 9030624J02 gene                                                                   | upstream mmu-mir-762     |
| 22      | 1    | 31233325  | 31233665  | 341   | Yes              | Yes | No       | No | ↓           | -0.20 | ENSMUSG00000050217                                                   | Lgsn               | lengsin, lens protein with glutamine synthetase domain                                       | downstream mmu-mir-5103  |
| 3537    | 7    | 52276223  | 52276502  | 280   | Yes              | Yes | No       | No | ↓           | -0.20 | ENSMUSG00000038387                                                   | Rras               | Harvey rat sarcoma oncogene, subgroup R                                                      | upstream mmu-mir-150     |
| 2175    | 2    | 38568797  | 38569145  | 349   | Yes              | Yes | No       | No | ↓           | -0.20 | ENSMUSG00000026751                                                   | Nr5a1              | nuclear receptor subfamily 5, group A, member 1                                              | upstream mmu-mir-181a-2  |
| 550     | 11   | 50723606  | 50723859  | 254   | Yes              | Yes | No       | No | ↓           | -0.20 | ENSMUSG00000049321                                                   | Zfp2               | zinc finger protein 2                                                                        | upstream mmu-mir-804     |
| 3850    | 8    | 97050935  | 97051356  | 422   | Yes              | Yes | No       | No | ↓           | -0.19 | ENSMUSG00000074151                                                   | Nlrc5              | NLR family, CARD domain containing 5                                                         | downstream mmu-mir-138-2 |
| 3976    | 9    | 37340926  | 37341162  | 237   | Yes              | Yes | No       | No | ↓           | -0.19 | ENSMUSG00000001946                                                   | Esam               | endothelial cell-specific adhesion molecule                                                  | upstream mmu-mir-100     |
| 2012    | 19   | 29654132  | 29654407  | 276   | Yes              | Yes | No       | No | ↓           | -0.19 | ENSMUSG00000038658                                                   | C030046E11Rik      | RIKEN cDNA C030046E11 gene                                                                   | downstream mmu-mir-101b  |
| 3961    | 9    | 31082478  | 31082716  | 239   | Yes              | Yes | No       | No | ↓           | -0.19 | ENSMUSG00000042496                                                   | Prdm10             | PR domain containing 10                                                                      | upstream mmu-mir-1946b   |
| 3611    | 7    | 110700775 | 110701123 | 349   | Yes              | Yes | No       | No | ↓           | -0.18 | ENSMUSG00000078624                                                   | Olf1r613           | olfactory receptor 613                                                                       | downstream mmu-mir-139   |
| 254     | 10   | 12809305  | 12809958  | 654   | Yes              | Yes | No       | No | ↓           | -0.18 | ENSMUSG00000019817                                                   | Plagl1             | pleiomorphic adeNoma gene-like 1                                                             | downstream mmu-mir-5104  |

| reg. ID | Chr. | start     | end       | width | Enrichment meDNA |     |    |    | effect dir. | logFC | ENSEMBL ID             | symbol                                                         | gene name                                                                    | next miRNA               |
|---------|------|-----------|-----------|-------|------------------|-----|----|----|-------------|-------|------------------------|----------------------------------------------------------------|------------------------------------------------------------------------------|--------------------------|
|         |      |           |           |       | C                | PS  | C  | PS |             |       |                        |                                                                |                                                                              |                          |
| 375     | 10   | 85757313  | 85757484  | 172   | Yes              | Yes | No | No | ↓           | -0.18 | ENSMUSG00000020044 //  |                                                                |                                                                              |                          |
| 2265    | 2    | 98170120  | 98170838  | 719   | Yes              | Yes | No | No | ↓           | -0.18 | ENSMUSG000000059602    | Timp3 // Syn3                                                  | tissue inhibitor of metalloproteinase 3 // synapsin III                      | downstream mmu-mir-3057  |
| 2688    | 3    | 153630863 | 153631205 | 343   | Yes              | Yes | No | No | ↓           | -0.18 | ENSMUSG000000080802    | Gm13804                                                        | predicted gene 13804                                                         | upstream mmu-mir-670     |
| 809     | 12   | 53060093  | 53060487  | 395   | Yes              | Yes | No | No | ↓           | -0.17 | ENSMUSG000000028360    | Slc44a5                                                        | solute carrier family 44, member 5                                           | upstream mmu-mir-3963    |
| 3229    | 5    | 148673884 | 148674599 | 716   | Yes              | Yes | No | No | ↓           | -0.17 | ENSMUSG000000035181    | Heatr5a                                                        | HEAT repeat containing 5A                                                    | downstream mmu-mir-1892  |
| 2211    | 2    | 70957388  | 70957814  | 427   | Yes              | Yes | No | No | ↓           | -0.17 | ENSMUSG000000029649    | Pomp                                                           | proteasome maturation protein                                                | downstream mmu-mir-5105  |
| 4138    | 9    | 119246762 | 119247040 | 279   | Yes              | Yes | No | No | ↓           | -0.16 | ENSMUSG000000027015    | Cybrd1                                                         | cytochrome b reductase 1                                                     | downstream mmu-mir-5115  |
| 989     | 13   | 48360319  | 48360921  | 603   | Yes              | Yes | No | No | ↓           | -0.16 | ENSMUSG000000032508    | Myd88                                                          | myeloid differentiation primary response gene 88                             | downstream mmu-mir-26a-1 |
|         |      |           |           |       |                  |     |    |    | ↓           | -0.16 | ENSMUSG000000021379    | Id4                                                            | inhibitor of DNA binding 4                                                   | downstream mmu-let-7d    |
|         |      |           |           |       |                  |     |    |    |             |       | ENSMUSG000000038583 // |                                                                |                                                                              |                          |
| 318     | 10   | 53018777  | 53019023  | 247   | Yes              | Yes | No | No | ↓           | -0.14 | ENSMUSG000000038594    | Pln // Gm9766                                                  | phospholamban // predicted gene 9766                                         | upstream mmu-mir-466j    |
|         |      |           |           |       |                  |     |    |    |             |       |                        | a disintegrin-like and metallopeptidase (reprolysin type) with |                                                                              |                          |
| 3071    | 5    | 90316437  | 90316928  | 492   | Yes              | Yes | No | No | ↓           | -0.13 | ENSMUSG000000043635    | Adamts3                                                        | thrombospondin type 1 motif, 3                                               | upstream mmu-mir-3969    |
| 2122    | 19   | 59023959  | 59024160  | 202   | Yes              | Yes | No | No | ↓           | -0.13 | ENSMUSG000000048029    | ENo4                                                           | eNolase 4                                                                    | upstream mmu-mir-3086    |
| 3631    | 7    | 122315033 | 122316086 | 1054  | Yes              | Yes | No | No | ↓           | -0.13 | ENSMUSG000000046411    | Gm6816                                                         | predicted gene 6816                                                          | upstream mmu-mir-762     |
| 94      | 1    | 93694882  | 93695159  | 278   | Yes              | Yes | No | No | ↓           | -0.12 | ENSMUSG000000007805    | Twist2                                                         | twist homolog 2 (Drosophila)                                                 | upstream mmu-mir-149     |
| 11      | 1    | 16610530  | 16610742  | 213   | Yes              | Yes | No | No | ↓           | -0.12 | ENSMUSG000000025939    | Ube2w                                                          | ubiquitin-conjugating enzyme E2W (putative)                                  | upstream mmu-mir-206     |
|         |      |           |           |       |                  |     |    |    |             |       | ENSMUSG000000070192 // |                                                                |                                                                              |                          |
| 811     | 12   | 53980545  | 53980725  | 181   | Yes              | Yes | No | No | ↓           | -0.12 | ENSMUSG000000061603    | n-R5s58 // Akap6                                               | nuclear encoded rRNA 5S 58 // A kinase (PRKA) anchor protein 6               | downstream mmu-mir-1892  |
| 651     | 11   | 90106921  | 90107341  | 421   | Yes              | Yes | No | No | ↓           | -0.11 | ENSMUSG000000003948    | Mmd                                                            | moNocyte to macrophage differentiation-associated                            | downstream mmu-mir-378b  |
|         |      |           |           |       |                  |     |    |    |             |       |                        | a disintegrin-like and metallopeptidase (reprolysin type) with |                                                                              |                          |
| 1453    | 15   | 94235922  | 94236235  | 314   | Yes              | Yes | No | No | ↓           | -0.11 | ENSMUSG000000022449    | Adamts20                                                       | thrombospondin type 1 motif, 20                                              | upstream mmu-mir-1941    |
| 525     | 11   | 43288872  | 43289143  | 272   | Yes              | Yes | No | No | ↓           | -0.10 | ENSMUSG000000046491    | C1qtnf2                                                        | C1q and tumor necrosis factor related protein 2                              | upstream mmu-mir-146a    |
| 1787    | 17   | 78890955  | 78891668  | 714   | Yes              | Yes | No | No | ↓           | -0.10 | ENSMUSG0000000061062   | Gm10093                                                        | predicted pseudogene 10093                                                   | upstream mmu-mir-1195    |
| 1489    | 15   | 98287084  | 98287440  | 357   | Yes              | Yes | No | No | ↓           | -0.10 | ENSMUSG000000032987    | Olf2r281                                                       | olfactory receptor 281                                                       | upstream mmu-mir-1941    |
| 686     | 11   | 99352405  | 99352894  | 490   | Yes              | Yes | No | No | ↓           | -0.10 | ENSMUSG000000006777    | Krt23                                                          | keratin 23                                                                   | downstream mmu-mir-5119  |
| 2176    | 2    | 38569234  | 38569481  | 248   | Yes              | Yes | No | No | ↓           | -0.09 | ENSMUSG000000026751    | Nr5a1                                                          | nuclear receptor subfamily 5, group A, member 1                              | upstream mmu-mir-181a-2  |
| 2728    | 4    | 34851386  | 34851594  | 209   | Yes              | Yes | No | No | ↓           | -0.09 | ENSMUSG000000028298    | Cga                                                            | glycoprotein hormones, alpha subunit                                         | downstream mmu-mir-876   |
| 1719    | 17   | 37311836  | 37312086  | 251   | Yes              | Yes | No | No | ↓           | -0.08 | ENSMUSG000000035186    | Ubd                                                            | ubiquitin D                                                                  | upstream mmu-mir-877     |
| 499     | 11   | 16136951  | 16137262  | 312   | Yes              | Yes | No | No | ↓           | -0.08 | ENSMUSG000000082410    | Gm12011                                                        | predicted gene 12011                                                         | downstream mmu-mir-1933  |
|         |      |           |           |       |                  |     |    |    |             |       | ENSMUSG000000021816 // |                                                                | protein phosphatase 3, catalytic subunit, beta isoform // ubiquitin specific |                          |
| 1136    | 14   | 21384184  | 21384553  | 370   | Yes              | Yes | No | No | ↓           | -0.08 | ENSMUSG000000034235    | Ppp3cb // Usp54                                                | peptidase 54                                                                 | upstream mmu-mir-3075    |
| 1421    | 15   | 83079984  | 83080159  | 176   | Yes              | Yes | No | No | ↓           | -0.07 | ENSMUSG000000047878    | A4galt                                                         | alpha 1,4-galactosyltransferase                                              | upstream mmu-mir-3080    |
| 4152    | 9    | 124040319 | 124040718 | 400   | Yes              | Yes | No | No | ↓           | -0.07 | ENSMUSG000000079227    | Ccr5                                                           | chemokine (C-C motif) receptor 5                                             | downstream mmu-mir-138-1 |
| 3476    | 7    | 7247178   | 7247584   | 407   | Yes              | Yes | No | No | ↓           | -0.06 | ENSMUSG000000000605    | Clcn4-2                                                        | chloride channel 4-2                                                         | upstream mmu-mir-5620    |
| 1738    | 17   | 46576273  | 46576542  | 270   | Yes              | Yes | No | No | ↓           | -0.06 | ENSMUSG0000000067144   | Slc22a7                                                        | solute carrier family 22 (organic anion transporter), member 7               | downstream mmu-mir-693   |
| 909     | 12   | 112726883 | 112727245 | 363   | Yes              | Yes | No | No | ↓           | -0.06 | ENSMUSG000000010529    | Gm266                                                          | predicted gene 266                                                           | upstream mmu-mir-3073    |
| 2130    | 2    | 5056607   | 5056985   | 379   | Yes              | Yes | No | No | ↓           | -0.06 | ENSMUSG000000026676    | Ccdc3                                                          | coiled-coil domain containing 3                                              | upstream mmu-mir-466m    |
|         |      |           |           |       |                  |     |    |    |             |       | ENSMUSG000000048070 // |                                                                | phosphoinositide-interacting regulator of transient receptor potential       |                          |
| 593     | 11   | 66724684  | 66724991  | 308   | Yes              | Yes | No | No | ↓           | -0.05 | ENSMUSG000000072834    | Pirt // Gm12298                                                | channels // predicted gene 12298                                             | upstream mmu-mir-744     |

| reg. ID | Chr. | start     | end       | width | Enrichment meDNA |     |     |     | effect dir. | logFC | ENSEMBL ID                               | symbol            | gene name                                                                            | next miRNA              |
|---------|------|-----------|-----------|-------|------------------|-----|-----|-----|-------------|-------|------------------------------------------|-------------------|--------------------------------------------------------------------------------------|-------------------------|
|         |      |           |           |       | C                | PS  | C   | PS  |             |       |                                          |                   |                                                                                      |                         |
| 1204    | 14   | 53070496  | 53070874  | 379   | Yes              | Yes | No  | No  | ↓           | -0.04 | ENSMUSG00000035626                       | Olf1509           | olfactory receptor 1509                                                              | downstream mmu-mir-686  |
| 650     | 11   | 89896819  | 89897137  | 319   | Yes              | Yes | No  | No  | ↓           | -0.04 | ENSMUSG00000069763                       | Tmem100           | transmembrane protein 100                                                            | downstream mmu-mir-378b |
| 2369    | 2    | 163369652 | 163369895 | 244   | Yes              | Yes | No  | No  | ↓           | -0.03 | ENSMUSG00000046840                       | O610008F07Rik     | RIKEN cDNA O610008F07 gene                                                           | downstream mmu-mir-3474 |
| 1831    | 18   | 14133585  | 14133901  | 317   | Yes              | Yes | No  | No  | ↓           | -0.02 | ENSMUSG00000024420                       | Zfp521            | zinc finger protein 521                                                              | downstream mmu-mir-1948 |
| 2497    | 3    | 58456156  | 58456931  | 776   | Yes              | Yes | No  | No  | ↓           | -0.01 | ENSMUSG00000070471                       | Fam194a           | family with sequence similarity 194, member A                                        | upstream mmu-mir-15b    |
| 2529    | 3    | 83645883  | 83646153  | 271   | Yes              | Yes | No  | No  | ↓           | -0.01 | ENSMUSG00000027995                       | Tlr2              | toll-like receptor 2                                                                 | upstream mmu-mir-466k   |
| 3014    | 5    | 64268747  | 64268986  | 240   | Yes              | Yes | No  | No  | ↓           | -0.01 | ENSMUSG00000060512                       | O610040J01Rik     | RIKEN cDNA O610040J01 gene                                                           | upstream mmu-mir-574    |
| 3050    | 5    | 75097307  | 75097823  | 517   | Yes              | Yes | No  | No  | ↓           | 0.00  | ENSMUSG00000029228                       | Lnx1              | ligand of numb-protein X 1                                                           | upstream mmu-mir-5098   |
| 3539    | 7    | 52513997  | 52514293  | 297   | Yes              | Yes | No  | No  | ↓           | 0.00  | ENSMUSG00000030798                       | Cd37              | CD37 antigen                                                                         | upstream mmu-mir-5121   |
| 2402    | 2    | 169945208 | 169945407 | 200   | No               | No  | Yes | Yes | ↑           | 0.01  | ENSMUSG00000052056                       | Zfp217            | zinc finger protein 217                                                              | downstream mmu-mir-296  |
| 2608    | 3    | 120876377 | 120876657 | 281   | No               | No  | Yes | Yes | ↑           | 0.01  | ENSMUSG00000028133                       | Rwdd3             | RWD domain containing 3                                                              | downstream mmu-mir-760  |
| 3228    | 5    | 148633787 | 148633982 | 196   | No               | No  | Yes | Yes | ↑           | 0.01  | ENSMUSG00000029649                       | Pomp              | proteasome maturation protein                                                        | downstream mmu-mir-5105 |
| 3965    | 9    | 32130003  | 32130278  | 276   | No               | No  | Yes | Yes | ↑           | 0.02  | ENSMUSG00000032034                       | Kcnj5             | potassium inwardly-rectifying channel, subfamily J, member 5                         | upstream mmu-mir-100    |
| 1800    | 17   | 83612261  | 83612513  | 253   | No               | No  | Yes | Yes | ↑           | 0.02  | ENSMUSG00000024247                       | Pkdcc             | protein kinase domain containing, cytoplasmic                                        | upstream mmu-mir-1195   |
| 2641    | 3    | 135146681 | 135146850 | 170   | No               | No  | Yes | Yes | ↑           | 0.03  | ENSMUSG00000028164                       | Manba             | manNosidase, beta A, lysosomal                                                       | upstream mmu-mir-1895   |
| 2898    | 4    | 138390529 | 138390886 | 358   | No               | No  | Yes | Yes | ↑           | 0.03  | ENSMUSG00000058908 // ENSMUSG00000041193 | Pla2g2a // Pla2g5 | phospholipase A2, group IIA (platelets, syNovial fluid) // phospholipase A2, group V | downstream mmu-mir-2139 |
| 4060    | 9    | 85734696  | 85735012  | 317   | No               | No  | Yes | Yes | ↑           | 0.03  | ENSMUSG00000035274                       | Tpbp              | trophoblast glycoprotein                                                             | downstream mmu-mir-184  |
| 451     | 10   | 120749170 | 120749406 | 237   | No               | No  | Yes | Yes | ↑           | 0.03  | ENSMUSG00000052302                       | Tbc1d30           | TBC1 domain family, member 30                                                        | upstream mmu-mir-763    |
| 1182    | 14   | 47003300  | 47004526  | 1227  | No               | No  | Yes | Yes | ↑           | 0.03  | ENSMUSG00000079261 // ENSMUSG00000021835 | Gm15217 // Bmp4   | predicted gene 15217 // bone morphogenetic protein 4                                 | upstream mmu-mir-5131   |
| 556     | 11   | 53883752  | 53883994  | 243   | No               | No  | Yes | Yes | ↑           | 0.03  | ENSMUSG00000020388                       | Pdlim4            | PDZ and LIM domain 4                                                                 | downstream mmu-mir-3061 |
| 3947    | 9    | 21989037  | 21989660  | 624   | No               | No  | Yes | Yes | ↑           | 0.04  | ENSMUSG00000061167                       | Rpl15-ps3         | ribosomal protein L15, pseudogene 3                                                  | upstream mmu-mir-1946b  |
| 2719    | 4    | 32843652  | 32844101  | 450   | No               | No  | Yes | Yes | ↑           | 0.04  | ENSMUSG00000045854 // ENSMUSG00000058006 | Lyrn2 // Mdn1     | LYR motif containing 2 // midasin homolog (yeast)                                    | downstream mmu-mir-876  |
| 1792    | 17   | 79330767  | 79331176  | 410   | No               | No  | Yes | Yes | ↑           | 0.04  | ENSMUSG00000024081                       | Cebpz             | CCAAT/enhancer binding protein zeta                                                  | upstream mmu-mir-1195   |
| 3104    | 5    | 104908083 | 104908330 | 248   | No               | No  | Yes | Yes | ↑           | 0.05  | ENSMUSG00000034462                       | Pkd2              | polycystic kidney disease 2                                                          | downstream mmu-mir-5619 |
| 3237    | 5    | 151319634 | 151319902 | 269   | No               | No  | Yes | Yes | ↑           | 0.05  | ENSMUSG00000056586                       | Zar1l             | zygote arrest 1-like                                                                 | downstream mmu-mir-5105 |
| 480     | 11   | 3092744   | 3093013   | 270   | No               | No  | Yes | Yes | ↑           | 0.05  | ENSMUSG00000023764                       | Sfi1              | Sfi1 homolog, spindle assembly associated (yeast)                                    | upstream mmu-mir-3060   |
| 3724    | 8    | 10807142  | 10807658  | 517   | No               | No  | Yes | Yes | ↑           | 0.06  | ENSMUSG000000062458                      | Gm8623            | predicted gene 8623                                                                  | downstream mmu-mir-1968 |
| 2644    | 3    | 137796736 | 137797014 | 279   | No               | No  | Yes | Yes | ↑           | 0.06  | ENSMUSG00000028158                       | Mtpp              | microsomal triglyceride transfer protein                                             | upstream mmu-mir-1956   |
| 421     | 10   | 115028742 | 115029312 | 571   | No               | No  | Yes | Yes | ↑           | 0.07  | ENSMUSG00000020140                       | Lgr5              | leucine rich repeat containing G protein coupled receptor 5                          | downstream mmu-mir-763  |
| 2060    | 19   | 44065549  | 44066096  | 548   | No               | No  | Yes | Yes | ↑           | 0.07  | ENSMUSG00000025196                       | Cpn1              | carboxypeptidase N, polypeptide 1                                                    | upstream mmu-mir-5114   |
| 3852    | 8    | 98015206  | 98015695  | 490   | No               | No  | Yes | Yes | ↑           | 0.07  | ENSMUSG00000046707                       | Csnk2a2           | casein kinase 2, alpha prime polypeptide                                             | upstream mmu-mir-1186b  |
| 4068    | 9    | 89945685  | 89946425  | 741   | No               | No  | Yes | Yes | ↑           | 0.07  | ENSMUSG00000032359                       | Ctsh              | cathepsin H                                                                          | upstream mmu-mir-184    |
| 1111    | 13   | 114108131 | 114108794 | 664   | No               | No  | Yes | Yes | ↑           | 0.07  | ENSMUSG00000021763                       | BC067074          | cDNA sequence BC067074                                                               | downstream mmu-mir-449a |
| 3049    | 5    | 74424926  | 74425458  | 533   | No               | No  | Yes | Yes | ↑           | 0.08  | ENSMUSG00000054814                       | Usp46             | ubiquitin specific peptidase 46                                                      | upstream mmu-mir-5098   |
| 2881    | 4    | 134959662 | 134960043 | 382   | No               | No  | Yes | Yes | ↑           | 0.09  | ENSMUSG000000081136                      | Gm12990           | predicted gene 12990                                                                 | downstream mmu-mir-700  |
| 1643    | 16   | 92829018  | 92830155  | 1138  | No               | No  | Yes | Yes | ↑           | 0.09  | ENSMUSG00000022952                       | Runx1             | runt related transcription factor 1                                                  | upstream mmu-mir-802    |
| 2950    | 4    | 154845180 | 154845533 | 354   | No               | No  | Yes | Yes | ↑           | 0.10  | ENSMUSG00000023153                       | Tmem52            | transmembrane protein 52                                                             | downstream mmu-mir-429  |
| 2380    | 2    | 164414806 | 164415294 | 489   | No               | No  | Yes | Yes | ↑           | 0.10  | ENSMUSG00000017733                       | Spinlw1           | serine protease inhibitor-like, with Kunitz and WAP domains 1 (eppin)                | downstream mmu-mir-3474 |

| reg. ID | Chr. | start     | end       | width | Enrichment meDNA |    |          |     | effect dir. | logFC | ENSEMBL ID                                  | symbol                   | gene name                                                                   | next miRNA              |
|---------|------|-----------|-----------|-------|------------------|----|----------|-----|-------------|-------|---------------------------------------------|--------------------------|-----------------------------------------------------------------------------|-------------------------|
|         |      |           |           |       | 5-Htt+/+         |    | 5-Htt+/- |     |             |       |                                             |                          |                                                                             |                         |
|         |      |           |           |       | C                | PS | C        | PS  |             |       |                                             |                          |                                                                             |                         |
| 3029    | 5    | 67993675  | 67994044  | 370   | No               | No | Yes      | Yes | ↑           | 0.10  | ENSMUSG00000050010                          | Shisa3                   | shisa homolog 3 (XeNopus laevis)                                            | downstream mmu-mir-574  |
| 462     | 10   | 124949359 | 124949886 | 528   | No               | No | Yes      | Yes | ↑           | 0.10  | ENSMUSG00000020102                          | Slc16a7                  | solute carrier family 16 (monoNocarboxylic acid transporters), member 7     | upstream mmu-mir-26a-2  |
| 2875    | 4    | 133136543 | 133137352 | 810   | No               | No | Yes      | Yes | ↑           | 0.10  | ENSMUSG00000028848 //<br>ENSMUSG00000028850 | Gpn2 // Gpatch3          | GPN-loop GTPase 2 // G patch domain containing 3                            | downstream mmu-mir-5122 |
| 3343    | 6    | 87325328  | 87325644  | 317   | No               | No | Yes      | Yes | ↑           | 0.11  | ENSMUSG00000030049                          | Gkn2                     | gastrokine 2                                                                | upstream mmu-mir-705    |
| 1116    | 13   | 115393466 | 115393678 | 213   | No               | No | Yes      | Yes | ↑           | 0.11  | ENSMUSG00000051758                          | 4930544M13Rik            | RIKEN cDNA 4930544M13 gene                                                  | downstream mmu-mir-449a |
| 1203    | 14   | 52996683  | 52996921  | 239   | No               | No | Yes      | Yes | ↑           | 0.11  | ENSMUSG00000060640                          | ---                      | NA                                                                          | downstream mmu-mir-686  |
| 4099    | 9    | 107880954 | 107881122 | 169   | No               | No | Yes      | Yes | ↑           | 0.11  | ENSMUSG00000032596                          | Uba7                     | ubiquitin-like modifier activating enzyme 7                                 | upstream mmu-mir-191    |
| 2708    | 4    | 11057620  | 11058318  | 699   | No               | No | Yes      | Yes | ↑           | 0.11  | ENSMUSG00000058164                          | ---                      | NA                                                                          | upstream mmu-mir-684-2  |
| 3212    | 5    | 143019222 | 143019509 | 288   | No               | No | Yes      | Yes | ↑           | 0.12  | ENSMUSG00000029576                          | Radil                    | Ras association and DIL domains                                             | upstream mmu-mir-339    |
| 1146    | 14   | 28023269  | 28023495  | 227   | No               | No | Yes      | Yes | ↑           | 0.12  | ENSMUSG00000021895                          | Arhgef3                  | Rho guanine nucleotide exchange factor (GEF) 3                              | downstream mmu-mir-3075 |
| 1098    | 13   | 109100635 | 109100882 | 248   | No               | No | Yes      | Yes | ↑           | 0.12  | ENSMUSG00000021697                          | Depdc1b                  | DEP domain containing 1B                                                    | upstream mmu-mir-582    |
| 1163    | 14   | 33821724  | 33822035  | 312   | No               | No | Yes      | Yes | ↑           | 0.12  | ENSMUSG00000041673 //<br>ENSMUSG00000051506 | Lrrc18 // Wdfy4          | leucine rich repeat containing 18 // WD repeat and FYVE domain containing 4 | upstream mmu-mir-346    |
| 336     | 10   | 67012910  | 67013365  | 456   | No               | No | Yes      | Yes | ↑           | 0.13  | ENSMUSG00000057134                          | Ado                      | 2-aminoethanethiol (cysteamine) dioxygenase                                 | downstream mmu-mir-5108 |
| 527     | 11   | 43418691  | 43419752  | 1062  | No               | No | Yes      | Yes | ↑           | 0.13  | ENSMUSG00000020405                          | Fabp6                    | fatty acid binding protein 6, ileal (gastrotropin)                          | upstream mmu-mir-146a   |
| 1161    | 14   | 33600582  | 33600925  | 344   | No               | No | Yes      | Yes | ↑           | 0.13  | ENSMUSG00000041707                          | 1810011H11Rik            | RIKEN cDNA 1810011H11 gene                                                  | upstream mmu-mir-346    |
| 1392    | 15   | 76765122  | 76765559  | 438   | No               | No | Yes      | Yes | ↑           | 0.13  | ENSMUSG00000054967                          | Zfp647                   | zinc finger protein 647                                                     | upstream mmu-mir-3079   |
| 1819    | 17   | 89024114  | 89024556  | 443   | No               | No | Yes      | Yes | ↑           | 0.13  | ENSMUSG00000033855                          | Ston1                    | stonin 1                                                                    | upstream mmu-mir-1195   |
| 2925    | 4    | 148506204 | 148506552 | 349   | No               | No | Yes      | Yes | ↑           | 0.13  | ENSMUSG00000073705                          | Apitd1                   | apoptosis-inducing, TAF9-like domain 1                                      | upstream mmu-mir-5616   |
| 1758    | 17   | 66768104  | 66768598  | 495   | No               | No | Yes      | Yes | ↑           | 0.13  | ENSMUSG00000052105                          | 1110012J17Rik            | RIKEN cDNA 1110012J17 gene                                                  | downstream mmu-mir-5709 |
| 2269    | 2    | 103330312 | 103330597 | 286   | No               | No | Yes      | Yes | ↑           | 0.14  | ENSMUSG00000027187                          | Cat                      | catalase                                                                    | downstream mmu-mir-1902 |
| 41      | 1    | 52003151  | 52003381  | 231   | No               | No | Yes      | Yes | ↑           | 0.14  | ENSMUSG00000065285                          | ---                      | NA                                                                          | upstream mmu-mir-5103   |
| 1282    | 14   | 104877036 | 104877211 | 176   | No               | No | Yes      | Yes | ↑           | 0.16  | ENSMUSG00000048349 //<br>ENSMUSG00000022120 | Pou4f1 // Rnf219         | POU domain, class 4, transcription factor 1 // ring finger protein 219      | upstream mmu-mir-5130   |
| 3723    | 8    | 10560071  | 10560342  | 272   | No               | No | Yes      | Yes | ↑           | 0.16  | ENSMUSG00000062458 //<br>ENSMUSG00000039057 | Gm8623 // Myo16          | predicted gene 8623 // myosin XVI                                           | downstream mmu-mir-1968 |
| 3576    | 7    | 86838583  | 86838862  | 280   | No               | No | Yes      | Yes | ↑           | 0.16  | ENSMUSG00000050382 //<br>ENSMUSG00000046591 | Kif7 //<br>5730590G19Rik | kinesin family member 7 // RIKEN cDNA 5730590G19 gene                       | downstream mmu-mir-9-3  |
| 1053    | 13   | 91352863  | 91353176  | 314   | No               | No | Yes      | Yes | ↑           | 0.16  | ENSMUSG00000021619                          | Atg10                    | autophagy-related 10 (yeast)                                                | upstream mmu-mir-5624   |
| 2788    | 4    | 84529491  | 84529727  | 237   | No               | No | Yes      | Yes | ↑           | 0.16  | ENSMUSG00000038070                          | Cntln                    | centlein, centrosomal protein                                               | upstream mmu-mir-491    |
| 4003    | 9    | 53515949  | 53516155  | 207   | No               | No | Yes      | Yes | ↑           | 0.16  | ENSMUSG00000055069                          | Rab39                    | RAB39, member RAS oncogene family                                           | upstream mmu-mir-5710   |
| 2564    | 3    | 96957059  | 96957266  | 208   | No               | No | Yes      | Yes | ↑           | 0.16  | ENSMUSG00000028093                          | Acp6                     | acid phosphatase 6, lysophosphatidic                                        | downstream mmu-mir-190b |
| 1532    | 16   | 17446806  | 17447033  | 228   | No               | No | Yes      | Yes | ↑           | 0.16  | ENSMUSG00000006134                          | Crkl                     | v-crk sarcoma virus CT10 oncogene homolog (avian)-like                      | upstream mmu-mir-301b   |
| 2592    | 3    | 102584291 | 102584599 | 309   | No               | No | Yes      | Yes | ↑           | 0.17  | ENSMUSG00000027857                          | Tshb                     | thyroid stimulating hormone, beta subunit                                   | downstream mmu-mir-190b |
| 1123    | 13   | 119172747 | 119173041 | 295   | No               | No | Yes      | Yes | ↑           | 0.17  | ENSMUSG00000021731                          | Mrps30                   | mitochondrial ribosomal protein S30                                         | downstream mmu-mir-449a |
| 1032    | 13   | 64467996  | 64468309  | 314   | No               | No | Yes      | Yes | ↑           | 0.18  | ENSMUSG00000021477                          | Ctsl                     | cathepsin L                                                                 | upstream mmu-mir-3074-1 |
| 2204    | 2    | 67956732  | 67956938  | 207   | No               | No | Yes      | Yes | ↑           | 0.18  | ENSMUSG00000034780                          | B3galt1                  | UDP-Gal:betaGlcNAc beta 1,3-galactosyltransferase, polypeptide 1            | downstream mmu-mir-5115 |



| reg. ID | Chr. | start     | end       | width | Enrichment meDNA |    |     |     | effect dir. | logFC | ENSEMBL ID                               | symbol                                                                      | gene name                                                                   | next miRNA                |
|---------|------|-----------|-----------|-------|------------------|----|-----|-----|-------------|-------|------------------------------------------|-----------------------------------------------------------------------------|-----------------------------------------------------------------------------|---------------------------|
|         |      |           |           |       | C                | PS | C   | PS  |             |       |                                          |                                                                             |                                                                             |                           |
| 3513    | 7    | 31349777  | 31350185  | 409   | No               | No | Yes | Yes | ↑           | 0.18  | ENSMUSG00000036826 // Tmem149 // U2af114 | transmembrane protein 149 // U2 small nuclear RNA auxiliary factor 1-like 4 | downstream mmu-mir-1964                                                     |                           |
| 454     | 10   | 121041099 | 121041382 | 284   | No               | No | Yes | Yes | ↑           | 0.19  | ENSMUSG00000020115 // ENSMUSG00000034667 | Tbk1 // Xpot                                                                | TANK-binding kinase 1 // exportin, tRNA (nuclear export receptor for tRNAs) | upstream mmu-mir-763      |
| 230     | 1    | 191546433 | 191547188 | 756   | No               | No | Yes | Yes | ↑           | 0.19  | ENSMUSG00000026604                       | Ptpn14                                                                      | protein tyrosine phosphatase, Non-receptor type 14                          | downstream mmu-mir-3473c  |
| 2652    | 3    | 141593558 | 141593900 | 343   | No               | No | Yes | Yes | ↑           | 0.19  | ENSMUSG00000080000 // ENSMUSG00000052430 | --- // Bmpr1b                                                               | NA // bone morphogenetic protein receptor, type 1B                          | downstream mmu-mir-1956   |
| 377     | 10   | 86175833  | 86176109  | 277   | No               | No | Yes | Yes | ↑           | 0.19  | ENSMUSG00000044937                       | BC030307                                                                    | cDNA sequence BC030307                                                      | downstream mmu-mir-135a-2 |
| 1486    | 15   | 98208788  | 98209102  | 315   | No               | No | Yes | Yes | ↑           | 0.20  | ENSMUSG00000056184                       | Olf2r283                                                                    | olfactory receptor 283                                                      | upstream mmu-mir-1941     |
| 89      | 1    | 92809681  | 92809996  | 316   | No               | No | Yes | Yes | ↑           | 0.20  | ENSMUSG00000026303                       | Mlph                                                                        | melaNophilin                                                                | upstream mmu-mir-149      |
| 850     | 12   | 77486766  | 77486979  | 214   | No               | No | Yes | Yes | ↑           | 0.20  | ENSMUSG00000033454                       | Zbtb1                                                                       | zinc finger and BTB domain containing 1                                     | downstream mmu-mir-5135   |
| 2347    | 2    | 154078659 | 154079003 | 345   | No               | No | Yes | Yes | ↑           | 0.20  | ENSMUSG00000067998                       | Bpifb9a                                                                     | BPI fold containing family B, member 9A                                     | upstream mmu-mir-695      |
| 1799    | 17   | 81426032  | 81426276  | 245   | No               | No | Yes | Yes | ↑           | 0.21  | ENSMUSG00000024246                       | Thumpd2                                                                     | THUMP domain containing 2                                                   | upstream mmu-mir-1195     |
| 275     | 10   | 21138856  | 21139464  | 609   | No               | No | Yes | Yes | ↑           | 0.22  | ENSMUSG00000037535                       | 1700021A07Rik                                                               | RIKEN cDNA 1700021A07 gene                                                  | downstream mmu-mir-5104   |
| 581     | 11   | 61078258  | 61078515  | 258   | No               | No | Yes | Yes | ↑           | 0.22  | ENSMUSG00000010025                       | Aldh3a2                                                                     | aldehyde dehydrogenase family 3, subfamily A2                               | downstream mmu-mir-5100   |
| 2385    | 2    | 165476902 | 165477422 | 521   | No               | No | Yes | Yes | ↑           | 0.22  | ENSMUSG00000081758 // ENSMUSG00000017897 | Gm11460 // Eya2                                                             | predicted gene 11460 // eYes absent 2 homolog (Drosophila)                  | downstream mmu-mir-3474   |
| 3055    | 5    | 77021717  | 77022001  | 285   | No               | No | Yes | Yes | ↑           | 0.22  | ENSMUSG00000036403                       | Cep135                                                                      | centrosomal protein 135                                                     | upstream mmu-mir-5098     |
| 3078    | 5    | 91315571  | 91316721  | 1151  | No               | No | Yes | Yes | ↑           | 0.23  | ENSMUSG00000029380                       | Cxcl1                                                                       | chemokine (C-X-C motif) ligand 1                                            | downstream mmu-mir-1961   |
| 1238    | 14   | 66698262  | 66698685  | 424   | No               | No | Yes | Yes | ↑           | 0.23  | ENSMUSG00000022039                       | Adam2                                                                       | a disintegrin and metallopeptidase domain 2                                 | downstream mmu-mir-3078   |
| 695     | 11   | 100219497 | 100219995 | 499   | No               | No | Yes | Yes | ↑           | 0.23  | ENSMUSG00000006930                       | Hap1                                                                        | huntingtin-associated protein 1                                             | downstream mmu-mir-5119   |
| 1009    | 13   | 55249814  | 55250054  | 241   | No               | No | Yes | Yes | ↑           | 0.23  | ENSMUSG00000005320                       | Fgfr4                                                                       | fibroblast growth factor receptor 4                                         | downstream mmu-mir-874    |
| 2053    | 19   | 42680733  | 42680970  | 238   | No               | No | Yes | Yes | ↑           | 0.23  | ENSMUSG00000025185                       | Loxl4                                                                       | lysyl oxidase-like 4                                                        | upstream mmu-mir-3085     |
| 1220    | 14   | 57484938  | 57485648  | 711   | No               | No | Yes | Yes | ↑           | 0.23  | ENSMUSG00000021945                       | Zmym2                                                                       | zinc finger, MYM-type 2                                                     | upstream mmu-mir-3077     |
| 4056    | 9    | 78254281  | 78254806  | 526   | No               | No | Yes | Yes | ↑           | 0.23  | ENSMUSG00000070291                       | Ddx43                                                                       | DEAD (Asp-Glu-Ala-Asp) box polypeptide 43                                   | upstream mmu-mir-5626     |
| 2021    | 19   | 32546110  | 32546481  | 372   | No               | No | Yes | Yes | ↑           | 0.24  | ENSMUSG00000062456                       | Rpl9-ps6                                                                    | ribosomal protein L9, pseudogene 6                                          | upstream mmu-mir-3970     |
| 1816    | 17   | 88407669  | 88408047  | 379   | No               | No | Yes | Yes | ↑           | 0.24  | ENSMUSG00000005370 // ENSMUSG00000005371 | Msh6 // Fbxo11                                                              | mutS homolog 6 (E. coli) // F-box protein 11                                | upstream mmu-mir-1195     |
| 1895    | 18   | 58036113  | 58036461  | 349   | No               | No | Yes | Yes | ↑           | 0.24  | ENSMUSG00000024597                       | Slc12a2                                                                     | solute carrier family 12, member 2                                          | upstream mmu-mir-5107     |
| 2845    | 4    | 119202799 | 119203019 | 221   | No               | No | Yes | Yes | ↑           | 0.24  | ENSMUSG00000065240 // ENSMUSG00000062260 | --- // ---                                                                  | NA // NA                                                                    | downstream mmu-mir-1957   |
| 922     | 13   | 3802066   | 3802383   | 318   | No               | No | Yes | Yes | ↑           | 0.24  | ENSMUSG00000063130                       | Calml3                                                                      | calmodulin-like 3                                                           | upstream mmu-mir-466i     |
| 3494    | 7    | 28332101  | 28332288  | 188   | No               | No | Yes | Yes | ↑           | 0.24  | ENSMUSG00000003363                       | Pld3                                                                        | phospholipase D family, member 3                                            | downstream mmu-mir-1191   |
| 1371    | 15   | 63894542  | 63895059  | 518   | No               | No | Yes | Yes | ↑           | 0.25  | ENSMUSG00000022378                       | Fam49b                                                                      | family with sequence similarity 49, member B                                | downstream mmu-mir-30b    |
| 3005    | 5    | 51948792  | 51948961  | 170   | No               | No | Yes | Yes | ↑           | 0.25  | ENSMUSG00000029167                       | Ppargc1a                                                                    | peroxisome proliferative activated receptor, gamma, coactivator 1 alpha     | downstream mmu-mir-218-1  |
| 2571    | 3    | 97964249  | 97964719  | 471   | No               | No | Yes | Yes | ↑           | 0.26  | ENSMUSG00000043468                       | Adam30                                                                      | a disintegrin and metallopeptidase domain 30                                | downstream mmu-mir-190b   |
| 1997    | 19   | 25107165  | 25107489  | 325   | No               | No | Yes | Yes | ↑           | 0.26  | ENSMUSG00000052085                       | Dock8                                                                       | dedicator of cytokinesis 8                                                  | upstream mmu-mir-3084     |
| 2820    | 4    | 108536005 | 108536359 | 355   | No               | No | Yes | Yes | ↑           | 0.27  | ENSMUSG00000003411                       | Rab3b                                                                       | RAB3B, member RAS oncogene family                                           | upstream mmu-mir-761      |

| reg. ID | Chr. | start     | end       | width | Enrichment meDNA |    |     |     | effect dir. | logFC | ENSEMBL ID            | symbol           | gene name                                                                  | next miRNA               |
|---------|------|-----------|-----------|-------|------------------|----|-----|-----|-------------|-------|-----------------------|------------------|----------------------------------------------------------------------------|--------------------------|
|         |      |           |           |       | C                | PS | C   | PS  |             |       |                       |                  |                                                                            |                          |
| 240     | 10   | 5733709   | 5733915   | 207   | No               | No | Yes | Yes | ↑           | 0.27  | ENSMUSG00000019768    | Esr1             | estrogen receptor 1 (alpha)                                                | upstream mmu-mir-5104    |
| 3067    | 5    | 86986020  | 86986223  | 204   | No               | No | Yes | Yes | ↑           | 0.27  | ENSMUSG00000079451 // | Tmprss11g //     | transmembrane protease, serine 11g // transmembrane protease, serine 11f   | downstream mmu-mir-3969  |
| 1236    | 14   | 66625813  | 66626127  | 315   | No               | No | Yes | Yes | ↑           | 0.27  | ENSMUSG00000034450    | Gulo             | guloNolactone (L-) oxidase                                                 | downstream mmu-mir-3078  |
| 2759    | 4    | 53693414  | 53693700  | 287   | No               | No | Yes | Yes | ↑           | 0.28  | ENSMUSG00000078703    | ---              | NA                                                                         | downstream mmu-mir-32    |
| 1264    | 14   | 77430580  | 77430819  | 240   | No               | No | Yes | Yes | ↑           | 0.28  | ENSMUSG00000044350    | 9030625A04Rik    | RIKEN cDNA 9030625A04 gene                                                 | downstream mmu-mir-1971  |
| 345     | 10   | 74323781  | 74323951  | 171   | No               | No | Yes | Yes | ↑           | 0.29  | ENSMUSG00000072407    | Gm6419           | predicted gene 6419                                                        | downstream mmu-mir-678   |
| 3033    | 5    | 72970136  | 72970575  | 440   | No               | No | Yes | Yes | ↑           | 0.29  | ENSMUSG00000063935    | Zar1             | zygote arrest 1                                                            | upstream mmu-mir-5098    |
| 3352    | 6    | 87617066  | 87617788  | 723   | No               | No | Yes | Yes | ↑           | 0.30  | ENSMUSG00000030051    | Aplf             | aprataxin and PNKP like factor                                             | upstream mmu-mir-705     |
| 3727    | 8    | 11683366  | 11684307  | 942   | No               | No | Yes | Yes | ↑           | 0.30  | ENSMUSG00000031509    | 1700016D06Rik    | RIKEN cDNA 1700016D06 gene                                                 | downstream mmu-mir-1968  |
| 2932    | 4    | 149331144 | 149332126 | 983   | No               | No | Yes | Yes | ↑           | 0.30  | ENSMUSG00000039911    | Spsb1            | splA/ryaNodine receptor domain and SOCS box containing 1                   | upstream mmu-mir-34a     |
| 3587    | 7    | 91561041  | 91561344  | 304   | No               | No | Yes | Yes | ↑           | 0.30  | ENSMUSG00000015709    | Arnt2            | aryl hydrocarbon receptor nuclear translocator 2                           | downstream mmu-mir-1839  |
| 822     | 12   | 66326292  | 66327082  | 791   | No               | No | Yes | Yes | ↑           | 0.30  | ENSMUSG00000035560    | Wdr20b           | WD repeat domain 20b                                                       | downstream mmu-mir-681   |
| 3941    | 9    | 20766078  | 20766307  | 230   | No               | No | Yes | Yes | ↑           | 0.31  | ENSMUSG00000004099    | Dnmt1            | DNA methyltransferase (cytosine-5) 1                                       | downstream mmu-mir-1900  |
| 1861    | 18   | 37678974  | 37679310  | 337   | No               | No | Yes | Yes | ↑           | 0.31  | ENSMUSG00000073591    | Pcdhb22          | protocadherin beta 22                                                      | downstream mmu-mir-1949  |
| 3408    | 6    | 122800125 | 122800385 | 261   | No               | No | Yes | Yes | ↑           | 0.31  | ENSMUSG00000040552    | C3ar1            | complement component 3a receptor 1                                         | downstream mmu-mir-141   |
| 1666    | 17   | 13106629  | 13106975  | 347   | No               | No | Yes | Yes | ↑           | 0.31  | ENSMUSG00000057388    | Mrpl18           | mitochondrial ribosomal protein L18                                        | upstream mmu-mir-99b     |
| 98      | 1    | 109314463 | 109314750 | 288   | No               | No | Yes | Yes | ↑           | 0.32  | ENSMUSG00000067001    | Serpinb7         | serine (or cysteine) peptidase inhibitor, clade B, member 7                | downstream mmu-mir-149   |
| 3271    | 6    | 34329666  | 34329904  | 239   | No               | No | Yes | Yes | ↑           | 0.33  | ENSMUSG00000081196 // | Gm13858 //       | predicted gene 13858 // predicted gene 13859                               | upstream mmu-mir-490     |
| 2309    | 2    | 127946767 | 127947010 | 244   | No               | No | Yes | Yes | ↑           | 0.33  | ENSMUSG00000027380    | Bcl2l11 // Acox1 | BCL2-like 11 (apoptosis facilitator) // acyl-Coenzyme A oxidase-like       | upstream mmu-mir-103-2   |
| 1035    | 13   | 67631796  | 67632037  | 242   | No               | No | Yes | Yes | ↑           | 0.33  | ENSMUSG00000071285    | ---              | NA                                                                         | upstream mmu-mir-466f-4  |
| 1276    | 14   | 96280847  | 96281169  | 323   | No               | No | Yes | Yes | ↑           | 0.34  | ENSMUSG00000034689    | 4921530L21Rik    | RIKEN cDNA 4921530L21 gene                                                 | downstream mmu-mir-5130  |
| 835     | 12   | 73221642  | 73222696  | 1055  | No               | No | Yes | Yes | ↑           | 0.34  | ENSMUSG00000077094    | ---              | NA                                                                         | upstream mmu-mir-681     |
| 3939    | 9    | 15487157  | 15487512  | 356   | No               | No | Yes | Yes | ↑           | 0.35  | ENSMUSG00000043885    | Slc36a4          | solute carrier family 36 (proton/amiNo acid symporter), member 4           | downstream mmu-mir-1900  |
| 2973    | 5    | 24608619  | 24609015  | 397   | No               | No | Yes | Yes | ↑           | 0.35  | ENSMUSG00000043833    | 2900005J15Rik    | RIKEN cDNA 2900005J15 gene                                                 | downstream mmu-mir-671   |
| 2266    | 2    | 102029692 | 102029893 | 202   | No               | No | Yes | Yes | ↑           | 0.35  | ENSMUSG00000048058    | Ldlrad3          | low density lipoprotein receptor class A domain containing 3               | downstream mmu-mir-1902  |
| 2559    | 3    | 96065100  | 96065415  | 316   | No               | No | Yes | Yes | ↑           | 0.36  | ENSMUSG00000068851    | ---              | NA                                                                         | downstream mmu-mir-190b  |
| 3438    | 6    | 136829507 | 136829785 | 279   | No               | No | Yes | Yes | ↑           | 0.36  | ENSMUSG00000030218    | Mgp              | matrix Gla protein                                                         | downstream mmu-mir-680-1 |
| 1518    | 15   | 101402117 | 101402431 | 315   | No               | No | Yes | Yes | ↑           | 0.36  | ENSMUSG00000022986    | Krt75            | keratin 75                                                                 | downstream mmu-mir-1941  |
| 326     | 10   | 62069271  | 62069550  | 280   | No               | No | Yes | Yes | ↑           | 0.36  | ENSMUSG00000020075    | Ddx21            | DEAD (Asp-Glu-Ala-Asp) box polypeptide 21                                  | downstream mmu-mir-5108  |
| 1455    | 15   | 94378033  | 94378505  | 473   | No               | No | Yes | Yes | ↑           | 0.39  | ENSMUSG00000059883    | Irak4            | interleukin-1 receptor-associated kinase 4                                 | upstream mmu-mir-1941    |
| 3268    | 6    | 31515562  | 31515798  | 237   | No               | No | Yes | Yes | ↑           | 0.40  | ENSMUSG00000025608    | Podxl            | podocalyxin-like                                                           | upstream mmu-mir-29b-1   |
| 2639    | 3    | 133897525 | 133897835 | 311   | No               | No | Yes | Yes | ↑           | 0.41  | ENSMUSG00000044365    | Cxxc4            | CXXC finger 4                                                              | downstream mmu-mir-1895  |
| 3116    | 5    | 108301808 | 108302471 | 664   | No               | No | Yes | Yes | ↑           | 0.42  | ENSMUSG00000011831    | Evi5             | ecotropic viral integration site 5                                         | upstream mmu-mir-701     |
| 1742    | 17   | 47445342  | 47445549  | 208   | No               | No | Yes | Yes | ↑           | 0.44  | ENSMUSG00000064043    | Mrps10 // Trerf1 | mitochondrial ribosomal protein S10 // transcriptional regulating factor 1 | downstream mmu-mir-693   |
| 3171    | 5    | 124234434 | 124234853 | 420   | No               | No | Yes | Yes | ↑           | 0.45  | ENSMUSG00000029414    | Kntc1            | kinetochore associated 1                                                   | upstream mmu-mir-3965    |
| 348     | 10   | 75081881  | 75082202  | 322   | No               | No | Yes | Yes | ↑           | 0.46  | ENSMUSG00000006342    | Susd2            | sushi domain containing 2                                                  | downstream mmu-mir-678   |
| 2253    | 2    | 83562829  | 83563031  | 203   | No               | No | Yes | Yes | ↑           | 0.46  | ENSMUSG00000027087    | Ilgav            | integrin alpha V                                                           | downstream mmu-mir-130a  |

| reg. ID | Chr. | start     | end       | width | Enrichment meDNA |    |          |     | effect dir. | logFC | ENSEMBL ID                                  | symbol                   | gene name                                                                            | next miRNA              |
|---------|------|-----------|-----------|-------|------------------|----|----------|-----|-------------|-------|---------------------------------------------|--------------------------|--------------------------------------------------------------------------------------|-------------------------|
|         |      |           |           |       | 5-Htt+/+         |    | 5-Htt+/- |     |             |       |                                             |                          |                                                                                      |                         |
|         |      |           |           |       | C                | PS | C        | PS  |             |       |                                             |                          |                                                                                      |                         |
| 881     | 12   | 101125553 | 101126031 | 479   | No               | No | Yes      | Yes | ↑           | 0.48  | ENSMUSG00000072886                          | ---                      | NA                                                                                   | downstream mmu-mir-1190 |
| 2145    | 2    | 17957373  | 17957980  | 608   | No               | No | Yes      | Yes | ↑           | 0.49  | ENSMUSG00000054057                          | A930004D18Rik            | RIKEN cDNA A930004D18 gene                                                           | downstream mmu-mir-511  |
| 316     | 10   | 44181109  | 44181866  | 758   | No               | No | Yes      | Yes | ↑           | 0.49  | ENSMUSG00000038151                          | Prdm1                    | PR domain containing 1, with ZNF domain                                              | downstream mmu-mir-1929 |
| 2552    | 3    | 94408321  | 94408919  | 599   | No               | No | Yes      | Yes | ↑           | 0.55  | ENSMUSG00000083323 //<br>ENSMUSG00000062896 | --- // Rpl31-ps11        | NA // ribosomal protein L31, pseudogene 11                                           | downstream mmu-mir-190b |
| 2254    | 2    | 84513354  | 84513558  | 205   | No               | No | Yes      | Yes | ↑           | 0.55  | ENSMUSG00000076437 //<br>ENSMUSG00000050043 | 2700094K13Rik //<br>Tmx2 | RIKEN cDNA 2700094K13 gene // thioredoxin-related transmembrane protein 2            | downstream mmu-mir-130a |
| 1592    | 16   | 50435836  | 50436363  | 528   | No               | No | Yes      | Yes | ↑           | 0.66  | ENSMUSG00000022641                          | Bbx                      | bobby sox homolog (Drosophila)                                                       | upstream mmu-mir-5118   |
| 1034    | 13   | 64986680  | 64986851  | 172   | No               | No | Yes      | Yes | ↑           | 0.72  | ENSMUSG00000033063                          | Cntnap3                  | contactin associated protein-like 3                                                  | upstream mmu-mir-3074-1 |
| 2048    | 19   | 42104546  | 42104715  | 170   | No               | No | Yes      | Yes | ↑           | 0.73  | ENSMUSG00000025172 //<br>ENSMUSG00000025171 | Ankrd2 // Ubtd1          | ankyrin repeat domain 2 (stretch responsive muscle) // ubiquitin domain containing 1 | downstream mmu-mir-3085 |

B) E-effects

| reg_ID | Chr. | start     | end       | width | Enrichment meDNA |    |          |    | effect dir. | logFC | ENSEMBL ID                               | symbol               | gene name                                                                                 | next miRNA                |
|--------|------|-----------|-----------|-------|------------------|----|----------|----|-------------|-------|------------------------------------------|----------------------|-------------------------------------------------------------------------------------------|---------------------------|
|        |      |           |           |       | 5-Htt+/*         |    | 5-Htt+/- |    |             |       |                                          |                      |                                                                                           |                           |
|        |      |           |           |       | C                | PS | C        | PS |             |       |                                          |                      |                                                                                           |                           |
| 1812   | 17   | 87477480  | 87478570  | 1091  | Yes              | No | Yes      | No | ↓           | -0.59 | ENSMUSG00000071035                       | Gm5499               | predicted pseudogene 5499                                                                 | upstream mmu-mir-1195     |
| 3774   | 8    | 36033392  | 36033602  | 211   | Yes              | No | Yes      | No | ↓           | -0.57 | ENSMUSG00000031529                       | Tnks                 | tankyrase, TRF1-interacting ankyrin-related ADP-ribose polymerase                         | downstream mmu-mir-383    |
| 3354   | 6    | 87960287  | 87960658  | 372   | Yes              | No | Yes      | No | ↓           | -0.49 | ENSMUSG00000044927 // ENSMUSG00000079477 | H1fx // Rab7         | H1 histone family, member X // RAB7, member RAS oncogene family                           | upstream mmu-mir-705      |
| 3726   | 8    | 11551940  | 11552376  | 437   | Yes              | No | Yes      | No | ↓           | -0.48 | ENSMUSG00000056228                       | Cars2                | cysteinyl-tRNA synthetase 2 (mitochondrial)(putative)                                     | downstream mmu-mir-1968   |
| 531    | 11   | 45534077  | 45534261  | 185   | Yes              | No | Yes      | No | ↓           | -0.47 | ENSMUSG00000077320                       |                      | Small nucleolar RNA SNoRA17                                                               | upstream mmu-mir-146a     |
| 3215   | 5    | 143942968 | 143943209 | 242   | Yes              | No | Yes      | No | ↓           | -0.44 | ENSMUSG00000029586                       | 4933411G11Rik        | RIKEN cDNA 4933411G11Rik gene                                                             | upstream mmu-mir-5105     |
| 869    | 12   | 88074694  | 88075010  | 317   | Yes              | No | Yes      | No | ↓           | -0.43 | ENSMUSG00000059114                       | Gm6772               | predicted gene 6772                                                                       | downstream mmu-mir-3068   |
| 1176   | 14   | 35081410  | 35081865  | 456   | Yes              | No | Yes      | No | ↓           | -0.37 | ENSMUSG00000041471                       | Fam35a               | family with sequence similarity 35, member A                                              | upstream mmu-mir-346      |
| 794    | 12   | 25389222  | 25389739  | 518   | Yes              | No | Yes      | No | ↓           | -0.35 | ENSMUSG00000020649 // ENSMUSG00000066553 | Rrm2 // Gm6969       | ribonucleotide reductase M2 // predicted pseudogene 6969                                  | downstream mmu-mir-3066   |
| 2102   | 19   | 56478325  | 56478881  | 557   | Yes              | No | Yes      | No | ↓           | -0.35 | ENSMUSG00000025076                       | Casp7                | caspase 7                                                                                 | upstream mmu-mir-5623     |
| 635    | 11   | 85160714  | 85161044  | 331   | Yes              | No | Yes      | No | ↓           | -0.35 | ENSMUSG00000059439                       | Bcas3                | breast carciNoma amplified sequence 3                                                     | upstream mmu-mir-1935     |
| 2172   | 2    | 34818037  | 34818578  | 542   | Yes              | No | Yes      | No | ↓           | -0.33 | ENSMUSG00000026875                       | Traf1                | TNF receptor-associated factor 1                                                          | upstream mmu-mir-3960     |
| 3875   | 8    | 111477836 | 111478263 | 428   | Yes              | No | Yes      | No | ↓           | -0.33 | ENSMUSG00000038872                       | Zfhx3                | zinc finger homeobox 3                                                                    | downstream mmu-mir-3108   |
| 413    | 10   | 104626225 | 104626657 | 433   | Yes              | No | Yes      | No | ↓           | -0.32 | ENSMUSG00000077407 // ENSMUSG00000036019 | // Tmtc2             | Small nucleolar RNA SNoRA17 // transmembrane and tetratricopeptide repeat containing 2    | downstream mmu-mir-3059   |
| 139    | 1    | 144990530 | 144990925 | 396   | Yes              | No | Yes      | No | ↓           | -0.30 | ENSMUSG00000078284                       | Cdc73                | cell division cycle 73, Paf1/RNA polymerase II complex component, homolog (S. cerevisiae) | downstream mmu-mir-181b-1 |
| 3634   | 7    | 123171580 | 123171989 | 410   | Yes              | No | Yes      | No | ↓           | -0.30 | ENSMUSG00000051910                       | Sox6                 | SRY-box containing gene 6                                                                 | upstream mmu-mir-762      |
| 359    | 10   | 76632735  | 76633306  | 572   | Yes              | No | Yes      | No | ↓           | -0.29 | ENSMUSG00000001435                       | Col18a1              | collagen, type XVIII, alpha 1                                                             | upstream mmu-mir-1930     |
| 2452   | 3    | 27923321  | 27923641  | 321   | Yes              | No | Yes      | No | ↓           | -0.29 | ENSMUSG00000027695                       | Pld1                 | phospholipase D1                                                                          | upstream mmu-mir-466q     |
| 618    | 11   | 75399931  | 75400493  | 563   | Yes              | No | Yes      | No | ↓           | -0.28 | ENSMUSG00000017781                       | Pitpna               | phosphatidylinositol transfer protein, alpha                                              | downstream mmu-mir-3971   |
| 2914   | 4    | 141569626 | 141569905 | 280   | Yes              | No | Yes      | No | ↓           | -0.28 | ENSMUSG00000051435                       | Fhad1                | forkhead-associated (FHA) phosphopeptide binding domain 1                                 | upstream mmu-mir-2139     |
| 2659   | 3    | 145538088 | 145538612 | 525   | Yes              | No | Yes      | No | ↓           | -0.27 | ENSMUSG00000028191 // ENSMUSG00000028194 | Bcl10 // Ddah1       | B cell leukemia/lymphoma 10 // dimethylarginine dimethylaminohydrolase 1                  | downstream mmu-mir-3963   |
| 2432   | 2    | 180964456 | 180964941 | 486   | Yes              | No | Yes      | No | ↓           | -0.25 | ENSMUSG00000047841 // ENSMUSG00000027580 | BC051628 // BC006779 | cDNA sequence BC051628 // cDNA sequence BC006779                                          | downstream mmu-mir-124-3  |
| 2749   | 4    | 44939851  | 44940124  | 274   | Yes              | No | Yes      | No | ↓           | -0.25 | ENSMUSG00000035637 // ENSMUSG00000035649 | Grhpr // Zcchc7      | glyoxylate reductase/hydroxypyruvate reductase // zinc finger, CCHC domain containing 7   | upstream mmu-mir-5120     |
| 3316   | 6    | 67364538  | 67364983  | 446   | Yes              | No | Yes      | No | ↓           | -0.25 | ENSMUSG00000018341                       | Il12rb2              | interleukin 12 receptor, beta 2                                                           | downstream mmu-mir-468    |
| 54     | 1    | 62684470  | 62684816  | 347   | Yes              | No | Yes      | No | ↓           | -0.24 | ENSMUSG00000046526 // ENSMUSG00000052062 | --- // Pard3b        | NA // par-3 partitioning defective 3 homolog B (C. elegans)                               | downstream mmu-mir-1928   |
| 3648   | 7    | 128123902 | 128124106 | 205   | Yes              | No | Yes      | No | ↓           | -0.24 | ENSMUSG00000030878                       | Cdr2                 | cerebellar degeneration-related 2                                                         | upstream mmu-mir-762      |
| 2444   | 3    | 17683961  | 17684158  | 198   | Yes              | No | Yes      | No | ↓           | -0.23 | ENSMUSG00000074674                       | Gm10742              | predicted gene 10742                                                                      | upstream mmu-mir-124-2    |

| reg_ID | Chr. | start     | end       | width | Enrichment meDNA |     |          |     | effect dir. | logFC | ENSEMBL ID                                | symbol                  | gene name                                                                                             | next miRNA                |
|--------|------|-----------|-----------|-------|------------------|-----|----------|-----|-------------|-------|-------------------------------------------|-------------------------|-------------------------------------------------------------------------------------------------------|---------------------------|
|        |      |           |           |       | 5-Htt+/-         |     | 5-Htt-/- |     |             |       |                                           |                         |                                                                                                       |                           |
|        |      |           |           |       | C                | PS  | C        | PS  |             |       |                                           |                         |                                                                                                       |                           |
| 3943   | 9    | 21192840  | 21193122  | 283   | Yes              | No  | Yes      | No  | ↓           | -0.23 | ENSMUSG00000032178                        | Ilf3                    | interleukin enhancer binding factor 3                                                                 | downstream mmu-mir-199a-1 |
| 486    | 11   | 4164725   | 4165063   | 339   | Yes              | No  | Yes      | No  | ↓           | -0.23 | ENSMUSG00000034394                        | Lif                     | leukemia inhibitory factor                                                                            | downstream mmu-mir-3060   |
| 2476   | 3    | 48412216  | 48412817  | 602   | Yes              | No  | Yes      | No  | ↓           | -0.23 | ENSMUSG00000037910                        | 1700018B24Rik           | RIKEN cDNA 1700018B24 gene                                                                            | downstream mmu-mir-1897   |
| 995    | 13   | 50095635  | 50096127  | 493   | Yes              | No  | Yes      | No  | ↓           | -0.22 | ENSMUSG00000074908                        | ---                     | NA                                                                                                    | downstream mmu-mir-683-1  |
| 1650   | 16   | 98020737  | 98020899  | 163   | Yes              | No  | Yes      | No  | ↓           | -0.22 | ENSMUSG00000005251 // ENSMUSG00000014039  | Ripk4 // Prdm15         | receptor-interacting serine-threonine kinase 4 // PR domain containing 15                             | downstream mmu-mir-802    |
| 2911   | 4    | 141225826 | 141226072 | 247   | Yes              | No  | Yes      | No  | ↓           | -0.22 | ENSMUSG00000028917                        | Plekhm2                 | pleckstrin homology domain containing, family M (with RUN domain) member 2                            | upstream mmu-mir-2139     |
| 2225   | 2    | 76543768  | 76543971  | 204   | Yes              | No  | Yes      | No  | ↓           | -0.22 | ENSMUSG00000002733 // ENSMUSG000000051747 | Plekha3 // Ttn          | pleckstrin homology domain-containing, family A (phosphoinositide binding specific) member 3 // titin | downstream mmu-mir-10b    |
| 2456   | 3    | 28774557  | 28775005  | 449   | Yes              | No  | Yes      | No  | ↓           | -0.21 | ENSMUSG00000074655                        | Gm1527                  | predicted gene 1527                                                                                   | downstream mmu-mir-466q   |
| 1213   | 14   | 56094004  | 56094170  | 167   | Yes              | No  | Yes      | No  | ↓           | -0.20 | ENSMUSG00000022210                        | Dhrs4                   | dehydrogenase/reductase (SDR family) member 4                                                         | upstream mmu-mir-208b     |
| 1044   | 13   | 69757968  | 69758351  | 384   | Yes              | No  | Yes      | No  | ↓           | -0.19 | ENSMUSG00000021595                        | Nsun2                   | NoL1/NoP2/Sun domain family member 2                                                                  | upstream mmu-mir-466f-4   |
| 1090   | 13   | 103564348 | 103564628 | 281   | Yes              | No  | Yes      | No  | ↓           | -0.19 | ENSMUSG00000021624 // ENSMUSG00000034751  | Cd180 // Mast4          | CD180 antigen // microtubule associated serine/threonine kinase family member 4                       | upstream mmu-mir-582      |
| 1166   | 14   | 34730914  | 34731450  | 537   | Yes              | No  | Yes      | No  | ↓           | -0.18 | ENSMUSG00000021943                        | Gdf10                   | growth differentiation factor 10                                                                      | upstream mmu-mir-346      |
| 1177   | 14   | 35417539  | 35417811  | 273   | Yes              | No  | Yes      | No  | ↓           | -0.18 | ENSMUSG00000021799                        | Opn4                    | opsin 4 (melaNopsin)                                                                                  | upstream mmu-mir-346      |
| 2210   | 2    | 69549549  | 69549768  | 220   | Yes              | No  | Yes      | No  | ↓           | -0.16 | ENSMUSG00000027086                        | Fastkd1                 | FAST kinase domains 1                                                                                 | downstream mmu-mir-5115   |
| 570    | 11   | 58600336  | 58600587  | 252   | Yes              | No  | Yes      | No  | ↓           | -0.16 | ENSMUSG00000059504                        | Olftr314                | olfactory receptor 314                                                                                | upstream mmu-mir-5100     |
| 2926   | 4    | 148848668 | 148849202 | 535   | Yes              | No  | Yes      | No  | ↓           | -0.15 | ENSMUSG00000028992                        | Nmnat1                  | nicotinamide nucleotide adenyltransferase 1                                                           | upstream mmu-mir-5616     |
| 3317   | 6    | 71097883  | 71098064  | 182   | Yes              | No  | Yes      | No  | ↓           | -0.14 | ENSMUSG00000054474                        | Thnsl2                  | threonine synthase-like 2 (bacterial)                                                                 | downstream mmu-mir-468    |
| 1209   | 14   | 55534627  | 55534907  | 281   | Yes              | No  | Yes      | No  | ↓           | -0.14 | ENSMUSG00000022199                        | Slc22a17                | solute carrier family 22 (organic cation transporter), member 17                                      | downstream mmu-mir-208a   |
| 665    | 11   | 95117001  | 95117197  | 197   | Yes              | No  | Yes      | No  | ↓           | -0.13 | ENSMUSG00000020872                        | Tac4                    | tachykinin 4                                                                                          | downstream mmu-mir-3063   |
| 3204   | 5    | 139787258 | 139787791 | 534   | Yes              | No  | Yes      | No  | ↓           | -0.10 | ENSMUSG00000056413                        | Adap1                   | ArfGAP with dual PH domains 1                                                                         | downstream mmu-mir-339    |
| 3589   | 7    | 96658688  | 96659035  | 348   | Yes              | No  | Yes      | No  | ↓           | -0.10 | ENSMUSG00000030623 // ENSMUSG00000039405  | 1700019G06Rik // Prss23 | RIKEN cDNA 1700019G06 gene // protease, serine, 23                                                    | upstream mmu-mir-708      |
| 3418   | 6    | 125446559 | 125446809 | 251   | Yes              | No  | Yes      | No  | ↓           | -0.10 | ENSMUSG00000030342                        | Cd9                     | CD9 antigen                                                                                           | downstream mmu-mir-3098   |
| 1572   | 16   | 36915463  | 36915709  | 247   | Yes              | No  | Yes      | No  | ↓           | -0.09 | ENSMUSG00000022831 // ENSMUSG00000034243  | Hcls1 // Golgb1         | hematopoietic cell specific Lyn substrate 1 // golgi autoantigen, golgin subfamily b, macrogolgin 1   | downstream mmu-mir-1947   |
| 1225   | 14   | 58141531  | 58141774  | 244   | Yes              | No  | Yes      | No  | ↓           | -0.08 | ENSMUSG00000050222                        | Il17d                   | interleukin 17D                                                                                       | upstream mmu-mir-3077     |
| 2207   | 2    | 69386514  | 69386730  | 217   | Yes              | No  | Yes      | No  | ↓           | -0.08 | ENSMUSG00000027070                        | Lrp2                    | low density lipoprotein receptor-related protein 2                                                    | downstream mmu-mir-5115   |
| 2128   | 2    | 4878461   | 4878773   | 313   | Yes              | No  | Yes      | No  | ↓           | -0.07 | ENSMUSG00000082795                        | Gm13193                 | predicted gene 13193                                                                                  | upstream mmu-mir-466m     |
| 1426   | 15   | 83955189  | 83955587  | 399   | Yes              | No  | Yes      | No  | ↓           | -0.05 | ENSMUSG00000018868                        | Pnpla5                  | patatin-like phospholipase domain containing 5                                                        | downstream mmu-mir-1249   |
| 2806   | 4    | 101387961 | 101388267 | 307   | Yes              | No  | Yes      | No  | ↓           | -0.05 | ENSMUSG00000057722                        | Lepr                    | leptin receptor                                                                                       | upstream mmu-mir-101a     |
| 779    | 12   | 4749851   | 4750016   | 166   | Yes              | No  | Yes      | No  | ↓           | -0.05 | ENSMUSG00000079177                        | 4930417G10Rik           | RIKEN cDNA 4930417G10 gene                                                                            | upstream mmu-mir-3066     |
| 1217   | 14   | 56467479  | 56467680  | 202   | Yes              | No  | Yes      | No  | ↓           | -0.03 | ENSMUSG00000075592                        | Nynrin                  | NYN domain and retroviral integrase containing                                                        | upstream mmu-mir-208b     |
| 1877   | 18   | 42419323  | 42419639  | 317   | Yes              | No  | Yes      | No  | ↓           | -0.01 | ENSMUSG00000024493                        | Lars                    | leucyl-tRNA synthetase                                                                                | downstream mmu-mir-5097   |
| 770    | 11   | 120591735 | 120591982 | 248   | Yes              | No  | Yes      | No  | ↓           | 0.00  | ENSMUSG00000025150                        | Cbr2                    | carbonyl reductase 2                                                                                  | upstream mmu-mir-338      |
| 3567   | 7    | 73909608  | 73910201  | 594   | No               | Yes | No       | Yes | ↑           | 0.00  | ENSMUSG00000030510                        | Lass3                   | LAG1 homolog, ceramide synthase 3                                                                     | downstream mmu-mir-211    |
| 2153   | 2    | 24776424  | 24777489  | 1066  | No               | Yes | No       | Yes | ↑           | 0.00  | ENSMUSG00000036893                        | Ehmt1                   | euchromatic histone methyltransferase 1                                                               | upstream mmu-mir-3087     |
| 1037   | 13   | 67911042  | 67911446  | 405   | No               | Yes | No       | Yes | ↑           | 0.00  | ENSMUSG00000030446                        | Zfp273                  | zinc finger protein 273                                                                               | upstream mmu-mir-466f-4   |
| 2391   | 2    | 166885481 | 166885643 | 163   | No               | Yes | No       | Yes | ↑           | 0.01  | ENSMUSG00000039501                        | Znfx1                   | zinc finger, NFX1-type containing 1                                                                   | downstream mmu-mir-296    |

| reg. ID | Chr. | start     | end       | width | Enrichment meDNA |     |    |     | effect dir. | logFC                                          | ENSEMBL ID       | symbol                                                                                              | gene name                 | next miRNA |
|---------|------|-----------|-----------|-------|------------------|-----|----|-----|-------------|------------------------------------------------|------------------|-----------------------------------------------------------------------------------------------------|---------------------------|------------|
|         |      |           |           |       | 5-Htt+/*         | PS  | C  | PS  |             |                                                |                  |                                                                                                     |                           |            |
| 808     | 12   | 52849737  | 52849976  | 240   | No               | Yes | No | Yes |             | 0.01 ENSMUSG00000020954 // ENSMUSG000000035247 | Strn3 // Hectd1  | striatin, calmodulin binding protein 3 // HECT domain containing 1                                  | downstream mmu-mir-1892   |            |
|         |      |           |           |       |                  |     |    |     | ↑           |                                                |                  |                                                                                                     |                           |            |
| 382     | 10   | 87610930  | 87611132  | 203   | No               | Yes | No | Yes | ↑           | 0.01 ENSMUSG00000035351                        | Nup37            | nucleoporin 37                                                                                      | downstream mmu-mir-135a-2 |            |
| 3150    | 5    | 116376067 | 116376466 | 400   | No               | Yes | No | Yes | ↑           | 0.02 ENSMUSG00000029516                        | Cit              | citron                                                                                              | downstream mmu-mir-701    |            |
| 4088    | 9    | 104072319 | 104072594 | 276   | No               | Yes | No | Yes | ↑           | 0.02 ENSMUSG00000032560                        | Dnajc13          | Dnaj (Hsp40) homolog, subfamily C, member 13                                                        | upstream mmu-mir-2136     |            |
| 2044    | 19   | 41157150  | 41157501  | 352   | No               | Yes | No | Yes |             | 0.02 ENSMUSG00000050121 // ENSMUSG00000025013  | Opalin // Tll2   | oligodendrocytic myelin paraNodal and inner loop protein // tolloid-like 2                          | downstream mmu-mir-3085   |            |
|         |      |           |           |       |                  |     |    |     | ↑           |                                                |                  |                                                                                                     |                           |            |
| 1564    | 16   | 34685038  | 34685283  | 246   | No               | Yes | No | Yes | ↑           | 0.02 ENSMUSG00000022833                        | Ccdc14           | coiled-coil domain containing 14                                                                    | downstream mmu-mir-1947   |            |
| 3488    | 7    | 25666274  | 25666504  | 231   | No               | Yes | No | Yes | ↑           | 0.02 ENSMUSG00000040952                        | Rps19            | ribosomal protein S19                                                                               | downstream mmu-mir-3101   |            |
| 705     | 11   | 101613484 | 101613726 | 243   | No               | Yes | No | Yes | ↑           | 0.02 ENSMUSG00000034931                        | Dhx8             | DEAH (Asp-Glu-Ala-His) box polypeptide 8                                                            | downstream mmu-mir-5119   |            |
| 1854    | 18   | 37502614  | 37502947  | 334   | No               | Yes | No | Yes | ↑           | 0.02 ENSMUSG00000045062                        | Pcdhb7           | protocadherin beta 7                                                                                | downstream mmu-mir-1949   |            |
| 3492    | 7    | 26387031  | 26387393  | 363   | No               | Yes | No | Yes | ↑           | 0.02 ENSMUSG00000074261                        | Gm7092           | predicted gene 7092                                                                                 | downstream mmu-mir-3101   |            |
| 2998    | 5    | 44370699  | 44370911  | 213   | No               | Yes | No | Yes | ↑           | 0.03 ENSMUSG00000048373                        | Fgfbp1           | fibroblast growth factor binding protein 1                                                          | upstream mmu-mir-218-1    |            |
| 298     | 10   | 31133482  | 31133973  | 492   | No               | Yes | No | Yes | ↑           | 0.03 ENSMUSG00000000296                        | Tpd52l1          | tumor protein D52-like 1                                                                            | upstream mmu-mir-3473b    |            |
| 3842    | 8    | 95261425  | 95261666  | 242   | No               | Yes | No | Yes | ↑           | 0.03 ENSMUSG00000078967                        | Gm3272           | predicted pseudogene 3272                                                                           | upstream mmu-mir-138-2    |            |
| 3475    | 7    | 6683366   | 6683635   | 270   | No               | Yes | No | Yes | ↑           | 0.03 ENSMUSG00000051527                        | Usp29            | ubiquitin specific peptidase 29                                                                     | upstream mmu-mir-3099     |            |
| 1716    | 17   | 36120733  | 36120966  | 234   | No               | Yes | No | Yes |             | 0.03 ENSMUSG00000038500 // ENSMUSG00000024429  | Prr3 // Gnl1     | proline-rich polypeptide 3 // guanine nucleotide binding protein-like 1                             | upstream mmu-mir-877      |            |
|         |      |           |           |       |                  |     |    |     | ↑           |                                                |                  |                                                                                                     |                           |            |
| 4008    | 9    | 57182026  | 57182403  | 378   | No               | Yes | No | Yes | ↑           | 0.03 ENSMUSG00000066626                        | Gm5121           | predicted gene 5121                                                                                 | downstream mmu-mir-5710   |            |
| 1573    | 16   | 36931815  | 36932065  | 251   | No               | Yes | No | Yes |             | 0.03 ENSMUSG00000022831 // ENSMUSG000000034243 | Hcls1 // Golgb1  | hematopoietic cell specific Lyn substrate 1 // golgi autoantigen, golgin subfamily b, macrogolgin 1 | downstream mmu-mir-1947   |            |
|         |      |           |           |       |                  |     |    |     | ↑           |                                                |                  |                                                                                                     |                           |            |
| 2617    | 3    | 123143853 | 123144117 | 265   | No               | Yes | No | Yes | ↑           | 0.03 ENSMUSG00000027978                        | Prss12           | protease, serine, 12 neurotrypsin (motopsin)                                                        | upstream mmu-mir-760      |            |
| 2682    | 3    | 152336353 | 152336671 | 319   | No               | Yes | No | Yes | ↑           | 0.03 ENSMUSG00000039058                        | Ak5              | adenylate kinase 5                                                                                  | upstream mmu-mir-3963     |            |
| 2481    | 3    | 51497241  | 51497532  | 292   | No               | Yes | No | Yes |             | 0.04 ENSMUSG00000074603 // ENSMUSG000000061143 | Gm10729 // Mam13 | predicted gene 10729 // mastermind like 3 (Drosophila)                                              | downstream mmu-mir-1897   |            |
|         |      |           |           |       |                  |     |    |     | ↑           |                                                |                  |                                                                                                     |                           |            |
| 2509    | 3    | 68492517  | 68492909  | 393   | No               | Yes | No | Yes | ↑           | 0.04 ENSMUSG00000027776                        | Il12a            | interleukin 12a                                                                                     | upstream mmu-mir-15b      |            |
| 1470    | 15   | 96849252  | 96849630  | 379   | No               | Yes | No | Yes | ↑           | 0.04 ENSMUSG00000022464                        | Slc38a4          | solute carrier family 38, member 4                                                                  | upstream mmu-mir-1941     |            |
| 1309    | 14   | 122009137 | 122009513 | 377   | No               | Yes | No | Yes |             | 0.04 ENSMUSG00000025557 // ENSMUSG000000025558 | Slc15a1 // Dock9 | solute carrier family 15 (oligopeptide transporter), member 1 // dedicator of cytokinesis 9         | downstream mmu-mir-92a-1  |            |
|         |      |           |           |       |                  |     |    |     | ↑           |                                                |                  |                                                                                                     |                           |            |
| 1987    | 19   | 21875988  | 21876273  | 286   | No               | Yes | No | Yes | ↑           | 0.04 ENSMUSG00000024754                        | Tmem2            | transmembrane protein 2                                                                             | upstream mmu-mir-204      |            |
| 3686    | 7    | 142286142 | 142286654 | 513   | No               | Yes | No | Yes |             | 0.05 ENSMUSG00000047543 // ENSMUSG00000058325  | --- // Dock1     | NA // dedicator of cytokinesis 1                                                                    | upstream mmu-mir-1962     |            |
|         |      |           |           |       |                  |     |    |     | ↑           |                                                |                  |                                                                                                     |                           |            |
| 3429    | 6    | 129803965 | 129804241 | 277   | No               | Yes | No | Yes | ↑           | 0.05 ENSMUSG00000014543                        | Klra17           | killer cell lectin-like receptor, subfamily A, member 17                                            | downstream mmu-mir-680-1  |            |
| 1251    | 14   | 70921915  | 70922194  | 280   | No               | Yes | No | Yes | ↑           | 0.05 ENSMUSG00000022097                        | Sftpc            | surfactant associated protein C                                                                     | downstream mmu-mir-320    |            |
| 2398    | 2    | 168580463 | 168580784 | 322   | No               | Yes | No | Yes | ↑           | 0.05 ENSMUSG00000027547                        | Sall4            | sal-like 4 (Drosophila)                                                                             | downstream mmu-mir-296    |            |
| 1376    | 15   | 68023036  | 68023471  | 436   | No               | Yes | No | Yes | ↑           | 0.05 ENSMUSG00000022335                        | Zfat             | zinc finger and AT hook domain containing                                                           | downstream mmu-mir-30b    |            |
| 266     | 10   | 19430465  | 19430757  | 293   | No               | Yes | No | Yes | ↑           | 0.05 ENSMUSG00000020007                        | Il20ra           | interleukin 20 receptor, alpha                                                                      | downstream mmu-mir-5104   |            |
| 1048    | 13   | 79092752  | 79093067  | 316   | No               | Yes | No | Yes | ↑           | 0.05 ENSMUSG00000065339                        | ---              | NA                                                                                                  | downstream mmu-mir-682    |            |
| 911     | 12   | 112948677 | 112948973 | 297   | No               | Yes | No | Yes | ↑           | 0.05 ENSMUSG00000049792                        | Bag5             | BCL2-associated athaNogene 5                                                                        | upstream mmu-mir-3073     |            |
| 1079    | 13   | 99383774  | 99384423  | 650   | No               | Yes | No | Yes | ↑           | 0.05 ENSMUSG00000074750                        | ---              | NA                                                                                                  | downstream mmu-mir-1940   |            |

| reg. ID | Chr. | start     | end       | width | Enrichment meDNA |     |          |     | effect dir. | logFC | ENSEMBL ID                               | symbol            | gene name                                                                   | next miRNA               |
|---------|------|-----------|-----------|-------|------------------|-----|----------|-----|-------------|-------|------------------------------------------|-------------------|-----------------------------------------------------------------------------|--------------------------|
|         |      |           |           |       | 5-Htt+/*         | PS  | 5-Htt+/- | PS  |             |       |                                          |                   |                                                                             |                          |
| 666     | 11   | 95449473  | 95449949  | 477   | No               | Yes | No       | Yes | ↑           | 0.06  | ENSMUSG00000000120                       | Ngfr              | nerve growth factor receptor (TNFR superfamily, member 16)                  | downstream mmu-mir-3063  |
| 882     | 12   | 101127939 | 101128352 | 414   | No               | Yes | No       | Yes | ↑           | 0.06  | ENSMUSG000000021177                      | Tdp1              | tyrosyl-DNA phosphodiesterase 1                                             | downstream mmu-mir-1190  |
| 1906    | 18   | 63108516  | 63109633  | 1118  | No               | Yes | No       | Yes | ↑           | 0.06  | ENSMUSG000000071847                      | Apcdd1            | adeNomatosis polyposis coli down-regulated 1                                | upstream mmu-mir-143     |
| 1580    | 16   | 43761565  | 43761948  | 384   | No               | Yes | No       | Yes | ↑           | 0.06  | ENSMUSG00000022705                       | Drd3              | dopamine receptor D3                                                        | downstream mmu-mir-568   |
| 3521    | 7    | 35445146  | 35445494  | 349   | No               | Yes | No       | Yes | ↑           | 0.06  | ENSMUSG00000030499                       | Kctd15            | potassium channel tetramerisation domain containing 15                      | downstream mmu-mir-1964  |
| 319     | 10   | 56216896  | 56217111  | 216   | No               | Yes | No       | Yes | ↑           | 0.06  | ENSMUSG00000050953                       | Gja1              | gap junction protein, alpha 1                                               | upstream mmu-mir-466j    |
| 2522    | 3    | 82812246  | 82812531  | 286   | No               | Yes | No       | Yes | ↑           | 0.06  | ENSMUSG00000033860                       | Fgg               | fibriNogen gamma chain                                                      | upstream mmu-mir-466k    |
| 996     | 13   | 50559259  | 50559862  | 604   | No               | Yes | No       | Yes | ↑           | 0.06  | ENSMUSG00000071909                       | Gm806             | predicted gene 806                                                          | downstream mmu-mir-683-1 |
| 554     | 11   | 53450789  | 53451099  | 311   | No               | Yes | No       | Yes | ↑           | 0.06  | ENSMUSG00000020383                       | Il13              | interleukin 13                                                              | downstream mmu-mir-3061  |
| 1184    | 14   | 47013375  | 47013576  | 202   | No               | Yes | No       | Yes | ↑           | 0.07  | ENSMUSG00000021835                       | Bmp4              | bone morphogenetic protein 4                                                | upstream mmu-mir-5131    |
| 2047    | 19   | 41899049  | 41899237  | 189   | No               | Yes | No       | Yes | ↑           | 0.07  | ENSMUSG00000067199                       | Frat1             | frequently rearranged in advanced T cell lymphomas                          | downstream mmu-mir-3085  |
| 241     | 10   | 5833726   | 5833961   | 236   | No               | Yes | No       | Yes | ↑           | 0.07  | ENSMUSG00000019767                       | Gm221             | predicted gene 221                                                          | upstream mmu-mir-5104    |
| 1884    | 18   | 48206052  | 48206319  | 268   | No               | Yes | No       | Yes | ↑           | 0.07  | ENSMUSG00000059040                       | Gm5506            | predicted gene 5506                                                         | downstream mmu-mir-5097  |
| 1659    | 17   | 8589782   | 8590059   | 278   | No               | Yes | No       | Yes | ↑           | 0.07  | ENSMUSG00000058159                       | T2                | brachyury 2                                                                 | upstream mmu-mir-692-1   |
| 3297    | 6    | 48938474  | 48938862  | 389   | No               | Yes | No       | Yes | ↑           | 0.08  | ENSMUSG00000039215                       | Svs1              | seminal vesicle secretory protein 1                                         | upstream mmu-mir-704     |
| 3107    | 5    | 105946140 | 105946378 | 239   | No               | Yes | No       | Yes | ↑           | 0.08  | ENSMUSG00000054720                       | Lrrc8c            | leucine rich repeat containing 8 family, member C                           | downstream mmu-mir-5619  |
| 1979    | 19   | 16034141  | 16034557  | 417   | No               | Yes | No       | Yes | ↑           | 0.08  | ENSMUSG00000041491                       | Cep78             | centrosomal protein 78                                                      | upstream mmu-mir-204     |
| 3379    | 6    | 101311897 | 101312124 | 228   | No               | Yes | No       | Yes | ↑           | 0.09  | ENSMUSG00000035357                       | Pdzn3             | PDZ domain containing RING finger 3                                         | upstream mmu-mir-705     |
| 3186    | 5    | 135826782 | 135827588 | 807   | No               | Yes | No       | Yes | ↑           | 0.09  | ENSMUSG00000040013                       | Fkbp6             | FK506 binding protein 6                                                     | downstream mmu-mir-721   |
| 258     | 10   | 14162696  | 14163007  | 312   | No               | Yes | No       | Yes | ↑           | 0.09  | ENSMUSG00000071532 // ENSMUSG00000039116 | Gm10335 // Gpr126 | predicted gene 10335 // G protein-coupled receptor 126                      | downstream mmu-mir-5104  |
| 1675    | 17   | 24006224  | 24006528  | 305   | No               | Yes | No       | Yes | ↑           | 0.09  | ENSMUSG00000024116                       | Prss21            | protease, serine, 21                                                        | downstream mmu-mir-5125  |
| 3681    | 7    | 140893351 | 140893626 | 276   | No               | Yes | No       | Yes | ↑           | 0.09  | ENSMUSG00000030979                       | Uros              | uroporphyrinogen III synthase                                               | upstream mmu-mir-1962    |
| 2771    | 4    | 59006179  | 59006341  | 163   | No               | Yes | No       | Yes | ↑           | 0.09  | ENSMUSG00000028378                       | Ptgr1             | prostaglandin reductase 1                                                   | upstream mmu-mir-3095    |
| 2181    | 2    | 52146535  | 52146897  | 363   | No               | Yes | No       | Yes | ↑           | 0.09  | ENSMUSG00000026950                       | Neb               | nebulin                                                                     | upstream mmu-mir-5129    |
| 110     | 1    | 132835994 | 132836195 | 202   | No               | Yes | No       | Yes | ↑           | 0.09  | ENSMUSG00000016524                       | Il19              | interleukin 19                                                              | upstream mmu-mir-135b    |
| 1644    | 16   | 93865780  | 93866055  | 276   | No               | Yes | No       | Yes | ↑           | 0.10  | ENSMUSG00000022945 // ENSMUSG00000039456 | Chaf1b // Morc3   | chromatin assembly factor 1, subunit B (p60) // microrchidia 3              | downstream mmu-mir-802   |
| 1430    | 15   | 84278991  | 84279417  | 427   | No               | Yes | No       | Yes | ↑           | 0.10  | ENSMUSG00000062760                       | 1810041L15Rik     | RIKEN cDNA 1810041L15 gene                                                  | downstream mmu-mir-1249  |
| 3158    | 5    | 118312626 | 118312968 | 343   | No               | Yes | No       | Yes | ↑           | 0.10  | ENSMUSG00000029361                       | Nos1              | nitric oxide synthase 1, neuronal                                           | downstream mmu-mir-701   |
| 2780    | 4    | 69515070  | 69515539  | 470   | No               | Yes | No       | Yes | ↑           | 0.10  | ENSMUSG00000080879 // ENSMUSG00000061015 | --- // ---        | NA // NA                                                                    | downstream mmu-mir-455   |
| 2558    | 3    | 95999025  | 95999383  | 359   | No               | Yes | No       | Yes | ↑           | 0.10  | ENSMUSG00000015943 // ENSMUSG00000038486 | Bola1 // Sv2a     | bola-like 1 (E. coli) // synaptic vesicle glycoprotein 2 a                  | downstream mmu-mir-190b  |
| 3838    | 8    | 91573421  | 91573661  | 241   | No               | Yes | No       | Yes | ↑           | 0.10  | ENSMUSG00000031665                       | Sall1             | sal-like 1 (Drosophila)                                                     | upstream mmu-mir-3074-2  |
| 3974    | 9    | 37058270  | 37058666  | 397   | No               | Yes | No       | Yes | ↑           | 0.10  | ENSMUSG00000066757 // ENSMUSG00000032122 | --- // Slc37a2    | NA // solute carrier family 37 (glycerol-3-phosphate transporter), member 2 | upstream mmu-mir-100     |
| 2029    | 19   | 36808219  | 36808558  | 340   | No               | Yes | No       | Yes | ↑           | 0.10  | ENSMUSG00000067279                       | Ppp1r3c           | protein phosphatase 1, regulatory (inhibitor) subunit 3C                    | downstream mmu-mir-1950  |
| 2256    | 2    | 86990202  | 86990477  | 276   | No               | Yes | No       | Yes | ↑           | 0.11  | ENSMUSG00000075158                       | Olf1111           | olfactory receptor 1111                                                     | upstream mmu-mir-130a    |
| 3503    | 7    | 29418646  | 29419250  | 605   | No               | Yes | No       | Yes | ↑           | 0.11  | ENSMUSG00000037469                       | C330005M16Rik     | RIKEN cDNA C330005M16 gene                                                  | downstream mmu-mir-1963  |

| reg. ID | Chr. | start     | end       | width | Enrichment meDNA |          |          |          | effect dir. | logFC                                         | ENSEMBL ID               | symbol                                                                                                                                | gene name                | next miRNA |
|---------|------|-----------|-----------|-------|------------------|----------|----------|----------|-------------|-----------------------------------------------|--------------------------|---------------------------------------------------------------------------------------------------------------------------------------|--------------------------|------------|
|         |      |           |           |       | 5-Htt+/*         | 5-Htt+/* | 5-Htt+/* | 5-Htt+/* |             |                                               |                          |                                                                                                                                       |                          |            |
| 234     | 1    | 193732789 | 193733167 | 379   | No               | Yes      | No       | Yes      |             | 0.11 ENSMUSG00000055833 // ENSMUSG00000037434 | 1700034H15Rik // Slc30a1 | RIKEN cDNA 1700034H15 gene // solute carrier family 30 (zinc transporter), member 1                                                   | downstream mmu-mir-3473c |            |
| 329     | 10   | 62407000  | 62407211  | 212   | No               | Yes      | No       | Yes      | ↑           | 0.11 ENSMUSG00000036875 // ENSMUSG00000071253 | Dna2 // Slc25a16         | DNA replication helicase 2 homolog (yeast) // solute carrier family 25 (mitochondrial carrier, Graves disease autoantigen), member 16 | downstream mmu-mir-5108  |            |
| 4121    | 9    | 115162948 | 115163232 | 285   | No               | Yes      | No       | Yes      | ↑           | 0.11 ENSMUSG00000032438 // ENSMUSG00000032437 | --- // Stt3b             | NA // STT3, subunit of the oligosaccharyltransferase complex, homolog B (S. cerevisiae)                                               | upstream mmu-mir-467h    |            |
| 1848    | 18   | 37135322  | 37135554  | 233   | No               | Yes      | No       | Yes      | ↑           | 0.11 ENSMUSG00000079714 // ENSMUSG00000007440 | --- // Pcdha9            | NA // protocadherin alpha subfamily C, 1                                                                                              | downstream mmu-mir-1949  |            |
| 2527    | 3    | 83075469  | 83075924  | 456   | No               | Yes      | No       | Yes      | ↑           | 0.11 ENSMUSG00000074517                       | Gm10710                  | predicted gene 10710                                                                                                                  | upstream mmu-mir-466k    |            |
| 411     | 10   | 99000422  | 99000988  | 567   | No               | Yes      | No       | Yes      | ↑           | 0.11 ENSMUSG00000044633                       | B530045E10Rik            | RIKEN cDNA B530045E10 gene                                                                                                            | downstream mmu-mir-3966  |            |
| 3442    | 6    | 137602579 | 137602746 | 168   | No               | Yes      | No       | Yes      | ↑           | 0.11 ENSMUSG00000015766                       | Eps8                     | epidermal growth factor receptor pathway substrate 8                                                                                  | downstream mmu-mir-680-1 |            |
| 1291    | 14   | 119030238 | 119030583 | 346   | No               | Yes      | No       | Yes      | ↑           | 0.11 ENSMUSG00000064644 // ENSMUSG00000032849 | // Abcc4                 | U6 spliceosomal RNA // ATP-binding cassette, sub-family C (CFTR/MRP), member 4                                                        | downstream mmu-mir-92a-1 |            |
| 2007    | 19   | 26827128  | 26827469  | 342   | No               | Yes      | No       | Yes      | ↑           | 0.11 ENSMUSG00000074913 // ENSMUSG00000024921 | Gm815 // Smarca2         | predicted gene 815 // SWI/SNF related, matrix associated, actin dependent regulator of chromatin, subfamily a, member 2               | upstream mmu-mir-3084    |            |
| 144     | 1    | 152604470 | 152604867 | 398   | No               | Yes      | No       | Yes      | ↑           | 0.11 ENSMUSG00000057399 // ENSMUSG00000066842 | --- // Hmcn1             | NA // hemicentin 1                                                                                                                    | upstream mmu-mir-488     |            |
| 1808    | 17   | 87155284  | 87155719  | 436   | No               | Yes      | No       | Yes      | ↑           | 0.12 ENSMUSG00000024140                       | Epas1                    | endothelial PAS domain protein 1                                                                                                      | upstream mmu-mir-1195    |            |
| 1312    | 14   | 122575495 | 122575664 | 170   | No               | Yes      | No       | Yes      | ↑           | 0.12 ENSMUSG00000025545                       | Clybl                    | citrate lyase beta like                                                                                                               | downstream mmu-mir-92a-1 |            |
| 2058    | 19   | 43986577  | 43986889  | 313   | No               | Yes      | No       | Yes      | ↑           | 0.12 ENSMUSG00000025195                       | Dnmbp                    | dynamin binding protein                                                                                                               | upstream mmu-mir-5114    |            |
| 3144    | 5    | 115873837 | 115874905 | 1069  | No               | Yes      | No       | Yes      | ↑           | 0.12 ENSMUSG00000054256                       | Msi1                     | Musashi homolog 1(Drosophila)                                                                                                         | downstream mmu-mir-701   |            |
| 2619    | 3    | 123282573 | 123282917 | 345   | No               | Yes      | No       | Yes      | ↑           | 0.12 ENSMUSG00000065113 // ENSMUSG00000027977 | --- // Ndst3             | NA // N-deacetylase/N-sulfotransferase (heparan glucosaminyl) 3                                                                       | upstream mmu-mir-760     |            |
| 1891    | 18   | 52854519  | 52855185  | 667   | No               | Yes      | No       | Yes      | ↑           | 0.12 ENSMUSG00000053624                       | Gykl1                    | glycerol kinase-like 1                                                                                                                | upstream mmu-mir-5107    |            |
| 3807    | 8    | 58452572  | 58453004  | 433   | No               | Yes      | No       | Yes      | ↑           | 0.12 ENSMUSG00000038257                       | Gira3                    | glycine receptor, alpha 3 subunit                                                                                                     | downstream mmu-mir-710   |            |
| 648     | 11   | 89862649  | 89862853  | 205   | No               | Yes      | No       | Yes      | ↑           | 0.12 ENSMUSG00000069765 // ENSMUSG00000020553 | --- // Pctp              | NA // phosphatidylcholine transfer protein                                                                                            | downstream mmu-mir-378b  |            |
| 3267    | 6    | 31346438  | 31346681  | 244   | No               | Yes      | No       | Yes      | ↑           | 0.12 ENSMUSG00000025609                       | Mkn1                     | muskelin 1, intracellular mediator containing kelch motifs                                                                            | upstream mmu-mir-29b-1   |            |
| 14      | 1    | 20807895  | 20808068  | 174   | No               | Yes      | No       | Yes      | ↑           | 0.12 ENSMUSG00000041859                       | Mcm3                     | minichromosome maintenance deficient 3 (S. cerevisiae)                                                                                | downstream mmu-mir-133b  |            |
| 643     | 11   | 87754336  | 87754505  | 170   | No               | Yes      | No       | Yes      | ↑           | 0.12 ENSMUSG00000044639                       | Gm11507                  | predicted gene 11507                                                                                                                  | downstream mmu-mir-142   |            |
| 1444    | 15   | 89205614  | 89205817  | 204   | No               | Yes      | No       | Yes      | ↑           | 0.12 ENSMUSG00000022615                       | Tymp                     | thymidine phosphorylase                                                                                                               | downstream mmu-let-7b    |            |
| 3164    | 5    | 122803144 | 122803311 | 168   | No               | Yes      | No       | Yes      | ↑           | 0.12 ENSMUSG00000038569                       | Rad9b                    | RAD9 homolog B (S. cerevisiae)                                                                                                        | downstream mmu-mir-701   |            |
| 971     | 13   | 41330037  | 41330823  | 787   | No               | Yes      | No       | Yes      | ↑           | 0.12 ENSMUSG00000021364                       | Elovl2                   | elongation of very long chain fatty acids (FEN1/Elo2, SUR4/Elo3, yeast)-like 2                                                        | downstream mmu-mir-5124  |            |
| 1507    | 15   | 100326264 | 100326870 | 607   | No               | Yes      | No       | Yes      | ↑           | 0.12 ENSMUSG00000044636                       | Csrnp2                   | cysteine-serine-rich nuclear protein 2                                                                                                | upstream mmu-mir-1941    |            |
| 1352    | 15   | 37100579  | 37100981  | 403   | No               | Yes      | No       | Yes      | ↑           | 0.13 ENSMUSG00000022286                       | Grhl2                    | grainyhead-like 2 (Drosophila)                                                                                                        | upstream mmu-mir-875     |            |
| 3021    | 5    | 65614403  | 65614878  | 476   | No               | Yes      | No       | Yes      | ↑           | 0.13 ENSMUSG00000037890                       | Wdr19                    | WD repeat domain 19                                                                                                                   | downstream mmu-mir-574   |            |



| reg. ID | Chr. | start     | end       | width | Enrichment meDNA |     |    |     | effect dir. | logFC | ENSEMBL ID                                | symbol                | gene name                                                                        | next miRNA                |
|---------|------|-----------|-----------|-------|------------------|-----|----|-----|-------------|-------|-------------------------------------------|-----------------------|----------------------------------------------------------------------------------|---------------------------|
|         |      |           |           |       | 5-Htt+/*         | PS  | C  | PS  |             |       |                                           |                       |                                                                                  |                           |
| 2846    | 4    | 119205358 | 119205848 | 491   | No               | Yes | No | Yes |             | 0.13  | ENSMUSG00000065240 // ENSMUSG00000062260  | --- // ---            | NA // NA                                                                         | downstream mmu-mir-1957   |
|         |      |           |           |       |                  |     |    |     | ↑           |       |                                           |                       |                                                                                  |                           |
| 878     | 12   | 99923550  | 99923778  | 229   | No               | Yes | No | Yes | ↑           | 0.13  | ENSMUSG00000021009                        | Ptpn21                | protein tyrosine phosphatase, Non-receptor type 21                               | downstream mmu-mir-1190   |
| 4078    | 9    | 99511591  | 99511868  | 278   | No               | Yes | No | Yes | ↑           | 0.13  | ENSMUSG00000037953                        | A4gnt                 | alpha-1,4-N-acetylglucosaminyltransferase                                        | upstream mmu-mir-2136     |
| 2458    | 3    | 30645640  | 30645882  | 243   | No               | Yes | No | Yes | ↑           | 0.13  | ENSMUSG00000051860                        | Samd7                 | sterile alpha motif domain containing 7                                          | downstream mmu-mir-551b   |
| 2873    | 4    | 132357714 | 132358054 | 341   | No               | Yes | No | Yes | ↑           | 0.13  | ENSMUSG00000081647                        | Gm13022               | predicted gene 13022                                                             | upstream mmu-mir-5122     |
| 385     | 10   | 87964190  | 87964417  | 228   | No               | Yes | No | Yes | ↑           | 0.13  | ENSMUSG00000060002                        | Chpt1                 | choline phosphotransferase 1                                                     | downstream mmu-mir-135a-2 |
| 3374    | 6    | 99674161  | 99674602  | 442   | No               | Yes | No | Yes | ↑           | 0.13  | ENSMUSG00000030069                        | Prok2                 | prokineticin 2                                                                   | upstream mmu-mir-705      |
| 2493    | 3    | 54863075  | 54863499  | 425   | No               | Yes | No | Yes | ↑           | 0.14  | ENSMUSG00000027793                        | Ccna1                 | cyclin A1                                                                        | upstream mmu-mir-15b      |
| 566     | 11   | 58193871  | 58194338  | 468   | No               | Yes | No | Yes | ↑           | 0.14  | ENSMUSG00000013643                        | 2210415F13Rik         | RIKEN cDNA 2210415F13 gene                                                       | upstream mmu-mir-5100     |
| 704     | 11   | 101484122 | 101484320 | 199   | No               | Yes | No | Yes | ↑           | 0.14  | ENSMUSG00000065767                        |                       | U2 spliceosomal RNA                                                              | downstream mmu-mir-5119   |
| 697     | 11   | 100566819 | 100567318 | 500   | No               | Yes | No | Yes |             | 0.14  | ENSMUSG00000017830 // ENSMUSG00000020918  | Dhx58 // Kat2a        | DEXH (Asp-Glu-X-His) box polypeptide 58 // K(lysine) acetyltransferase 2A        | downstream mmu-mir-5119   |
|         |      |           |           |       |                  |     |    |     | ↑           |       |                                           |                       |                                                                                  |                           |
| 361     | 10   | 79110753  | 79111007  | 255   | No               | Yes | No | Yes | ↑           | 0.14  | ENSMUSG00000035963                        | Odf3l2                | outer dense fiber of sperm tails 3-like 2                                        | upstream mmu-mir-1982     |
| 1311    | 14   | 122229694 | 122230394 | 701   | No               | Yes | No | Yes | ↑           | 0.14  | ENSMUSG00000041765                        | Ubac2                 | ubiquitin associated domain containing 2                                         | downstream mmu-mir-92a-1  |
| 4074    | 9    | 98502538  | 98503127  | 590   | No               | Yes | No | Yes | ↑           | 0.14  | ENSMUSG00000032459                        | Mrps22                | mitochondrial ribosomal protein S22                                              | upstream mmu-mir-2136     |
| 848     | 12   | 77142793  | 77143118  | 326   | No               | Yes | No | Yes | ↑           | 0.14  | ENSMUSG00000063450                        | Syne2                 | synaptic nuclear envelope 2                                                      | downstream mmu-mir-5101   |
| 3632    | 7    | 122316794 | 122317003 | 210   | No               | Yes | No | Yes | ↑           | 0.15  | ENSMUSG00000046411                        | Gm6816                | predicted gene 6816                                                              | upstream mmu-mir-762      |
| 2027    | 19   | 36193238  | 36193603  | 366   | No               | Yes | No | Yes | ↑           | 0.15  | ENSMUSG00000024803                        | Ankrd1                | ankyrin repeat domain 1 (cardiac muscle)                                         | downstream mmu-mir-1950   |
| 3990    | 9    | 44189296  | 44189647  | 352   | No               | Yes | No | Yes | ↑           | 0.15  | ENSMUSG00000032115                        | Hyou1                 | hypoxia up-regulated 1                                                           | downstream mmu-mir-125b-1 |
| 4127    | 9    | 117261163 | 117261546 | 384   | No               | Yes | No | Yes | ↑           | 0.15  | ENSMUSG00000039607                        | Rbms3                 | RNA binding motif, single stranded interacting protein                           | upstream mmu-mir-26a-1    |
| 1881    | 18   | 46515779  | 46516173  | 395   | No               | Yes | No | Yes | ↑           | 0.15  | ENSMUSG00000080355                        | ---                   | NA                                                                               | downstream mmu-mir-5097   |
| 1422    | 15   | 83262952  | 83263203  | 252   | No               | Yes | No | Yes |             | 0.15  | ENSMUSG00000049414 // ENSMUSG00000016664  | Gm5417 // Pacsin2     | predicted gene 5417 // protein kinase C and casein kinase substrate in neurons 2 | upstream mmu-mir-3080     |
|         |      |           |           |       |                  |     |    |     | ↑           |       |                                           |                       |                                                                                  |                           |
| 4024    | 9    | 64229192  | 64229640  | 449   | No               | Yes | No | Yes | ↑           | 0.15  | ENSMUSG00000036466                        | Megf11                | multiple EGF-like-domains 11                                                     | upstream mmu-mir-5133     |
| 606     | 11   | 69290421  | 69290898  | 478   | No               | Yes | No | Yes |             | 0.15  | ENSMUSG00000018476 // ENSMUSG00000005237  | Kdm6b // Dnahc2       | KDM1 lysine (K)-specific demethylase 6B // dynein, axonemal, heavy chain 2       | downstream mmu-mir-467f   |
|         |      |           |           |       |                  |     |    |     | ↑           |       |                                           |                       |                                                                                  |                           |
| 1319    | 15   | 6530516   | 6530757   | 242   | No               | Yes | No | Yes | ↑           | 0.15  | ENSMUSG00000022148                        | Fyb                   | FYN binding protein                                                              | upstream mmu-mir-1898     |
| 3573    | 7    | 82870878  | 82871179  | 302   | No               | Yes | No | Yes |             | 0.15  | ENSMUSG00000076961 // ENSMUSG00000066406  | // Akap13             | // A kinase (PRKA) anchor protein 13                                             | upstream mmu-mir-7a-2     |
|         |      |           |           |       |                  |     |    |     | ↑           |       |                                           |                       |                                                                                  |                           |
| 1107    | 13   | 112601065 | 112601546 | 482   | No               | Yes | No | Yes | ↑           | 0.16  | ENSMUSG00000021754                        | Map3k1                | mitogen-activated protein kinase kinase kinase 1                                 | upstream mmu-mir-449c     |
| 898     | 12   | 109722642 | 109722991 | 350   | No               | Yes | No | Yes |             | 0.16  | ENSMUSG00000082203 // ENSMUSG00000058070  | Gm15636 // Eml1       | predicted gene 15636 // echiNoderm microtubule associated protein like 1         | upstream mmu-mir-342      |
|         |      |           |           |       |                  |     |    |     | ↑           |       |                                           |                       |                                                                                  |                           |
| 4080    | 9    | 99617339  | 99617897  | 559   | No               | Yes | No | Yes | ↑           | 0.16  | ENSMUSG00000032473                        | Cldn18                | claudin 18                                                                       | upstream mmu-mir-2136     |
| 2395    | 2    | 167491630 | 167491871 | 242   | No               | Yes | No | Yes | ↑           | 0.16  | ENSMUSG00000019755                        | ---                   | NA                                                                               | downstream mmu-mir-296    |
| 1739    | 17   | 46793530  | 46793901  | 372   | No               | Yes | No | Yes | ↑           | 0.16  | ENSMUSG00000038545                        | Cul7                  | cullin 7                                                                         | downstream mmu-mir-693    |
| 3584    | 7    | 89131205  | 89131697  | 493   | No               | Yes | No | Yes |             | 0.16  | ENSMUSG00000052779 // ENSMUSG000000025105 | 4833418N17Rik // Bnc1 | RIKEN cDNA 4833418N17 gene // basonuclin 1                                       | downstream mmu-mir-1839   |
|         |      |           |           |       |                  |     |    |     | ↑           |       |                                           |                       |                                                                                  |                           |
| 3031    | 5    | 72908087  | 72908363  | 277   | No               | Yes | No | Yes |             | 0.16  | ENSMUSG00000005220 // ENSMUSG00000072889  | Corin // Nfxl1        | corin // nuclear transcription factor, X-box binding-like 1                      | upstream mmu-mir-5098     |
|         |      |           |           |       |                  |     |    |     | ↑           |       |                                           |                       |                                                                                  |                           |

| reg. ID | Chr. | start     | end       | width | Enrichment meDNA |          |          |          | effect dir. | logFC | ENSEMBL ID                               | symbol           | gene name                                                                                                 | next miRNA                |
|---------|------|-----------|-----------|-------|------------------|----------|----------|----------|-------------|-------|------------------------------------------|------------------|-----------------------------------------------------------------------------------------------------------|---------------------------|
|         |      |           |           |       | 5-Htt+/*         | 5-Htt+/* | 5-Htt+/* | 5-Htt+/* |             |       |                                          |                  |                                                                                                           |                           |
| 2694    | 4    | 3948925   | 3949264   | 340   | No               | Yes      | No       | Yes      | ↑           | 0.17  | ENSMUSG00000028236                       | Sdr16c5          | short chain dehydrogenase/reductase family 16C, member 5                                                  | downstream mmu-mir-3471-2 |
| 2357    | 2    | 158357101 | 158357370 | 270   | No               | Yes      | No       | Yes      | ↑           | 0.17  | ENSMUSG00000074625                       | Arhgap40         | Rho GTPase activating protein 40                                                                          | upstream mmu-mir-3474     |
| 1594    | 16   | 50593455  | 50593692  | 238   | No               | Yes      | No       | Yes      | ↑           | 0.17  | ENSMUSG00000050685                       | Ccdc54           | coiled-coil domain containing 54                                                                          | upstream mmu-mir-5118     |
| 4073    | 9    | 97936180  | 97936420  | 241   | No               | Yes      | No       | Yes      | ↑           | 0.17  | ENSMUSG00000032452                       | Clstn2           | calysntenin 2                                                                                             | upstream mmu-mir-2136     |
| 334     | 10   | 62919859  | 62920167  | 309   | No               | Yes      | No       | Yes      | ↑           | 0.17  | ENSMUSG00000060843                       | Ctnna3           | catenin (cadherin associated protein), alpha 3                                                            | downstream mmu-mir-5108   |
| 3312    | 6    | 64676526  | 64676756  | 231   | No               | Yes      | No       | Yes      | ↑           | 0.17  | ENSMUSG00000073043                       | Atoh1            | atonal homolog 1 (Drosophila)                                                                             | upstream mmu-mir-196b     |
| 1558    | 16   | 33720634  | 33721023  | 390   | No               | Yes      | No       | Yes      | ↑           | 0.17  | ENSMUSG00000075254 // ENSMUSG00000035500 | Heg1 // ---      | HEG homolog 1 (zebrafish) // NA                                                                           | downstream mmu-mir-1947   |
| 446     | 10   | 120203054 | 120203709 | 656   | No               | Yes      | No       | Yes      | ↑           | 0.17  | ENSMUSG00000044544                       | 4921513I03Rik    | RIKEN cDNA 4921513I03 gene                                                                                | upstream mmu-mir-763      |
| 3036    | 5    | 73125441  | 73125606  | 166   | No               | Yes      | No       | Yes      | ↑           | 0.17  | ENSMUSG00000054892                       | Txk              | TXK tyrosine kinase                                                                                       | upstream mmu-mir-5098     |
| 3486    | 7    | 25607024  | 25607260  | 237   | No               | Yes      | No       | Yes      | ↑           | 0.17  | ENSMUSG00000011350                       | Gm5893           | predicted gene 5893                                                                                       | downstream mmu-mir-3101   |
| 1112    | 13   | 114137153 | 114137688 | 536   | No               | Yes      | No       | Yes      | ↑           | 0.18  | ENSMUSG00000021763                       | BC067074         | cDNA sequence BC067074                                                                                    | downstream mmu-mir-449a   |
| 3792    | 8    | 44710589  | 44711018  | 430   | No               | Yes      | No       | Yes      | ↑           | 0.18  | ENSMUSG00000050190                       | Gm5346           | predicted gene 5346                                                                                       | upstream mmu-mir-383      |
| 1362    | 15   | 56529643  | 56530037  | 395   | No               | Yes      | No       | Yes      | ↑           | 0.18  | ENSMUSG00000022367                       | Has2             | hyaluronan synthase 2                                                                                     | upstream mmu-mir-28c      |
| 788     | 12   | 14937154  | 14937432  | 279   | No               | Yes      | No       | Yes      | ↑           | 0.18  | ENSMUSG00000064386                       |                  | U6 spliceosomal RNA                                                                                       | upstream mmu-mir-3066     |
| 1502    | 15   | 99762022  | 99762403  | 382   | No               | Yes      | No       | Yes      | ↑           | 0.18  | ENSMUSG00000045350                       | 1700030F18Rik    | RIKEN cDNA 1700030F18 gene                                                                                | upstream mmu-mir-1941     |
| 1113    | 13   | 114409629 | 114410176 | 548   | No               | Yes      | No       | Yes      | ↑           | 0.18  | ENSMUSG00000042364                       | Snx18            | sorting nexin 18                                                                                          | downstream mmu-mir-449a   |
| 1725    | 17   | 43405594  | 43405872  | 279   | No               | Yes      | No       | Yes      | ↑           | 0.18  | ENSMUSG00000041293                       | Gpr110           | G protein-coupled receptor 110                                                                            | upstream mmu-mir-693      |
| 2876    | 4    | 133803501 | 133803921 | 421   | No               | Yes      | No       | Yes      | ↑           | 0.18  | ENSMUSG00000028840                       | Zfp593           | zinc finger protein 593                                                                                   | downstream mmu-mir-5122   |
| 271     | 10   | 20602373  | 20602741  | 369   | No               | Yes      | No       | Yes      | ↑           | 0.19  | ENSMUSG00000019986                       | Ahi1             | Abelson helper integration site 1                                                                         | downstream mmu-mir-5104   |
| 2076    | 19   | 47204376  | 47204624  | 249   | No               | Yes      | No       | Yes      | ↑           | 0.19  | ENSMUSG00000033033 // ENSMUSG00000025047 | Calhm2 // Pdc11  | calcium homeostasis modulator 2 // programmed cell death 11                                               | downstream mmu-mir-146b   |
| 402     | 10   | 93657585  | 93657974  | 390   | No               | Yes      | No       | Yes      | ↑           | 0.19  | ENSMUSG00000020022 // ENSMUSG00000005897 | Ndufa12 // Nr2c1 | NADH dehydrogenase (ubiquinone) 1 alpha subcomplex, 12 // nuclear receptor subfamily 2, group C, member 1 | upstream mmu-mir-331      |
| 1668    | 17   | 15461631  | 15462099  | 469   | No               | Yes      | No       | Yes      | ↑           | 0.19  | ENSMUSG00000073453                       | ---              | NA                                                                                                        | upstream mmu-mir-99b      |
| 2121    | 19   | 59015598  | 59015868  | 271   | No               | Yes      | No       | Yes      | ↑           | 0.19  | ENSMUSG00000048029                       | ENo4             | eNolase 4                                                                                                 | upstream mmu-mir-3086     |
| 3128    | 5    | 111648319 | 111648886 | 568   | No               | Yes      | No       | Yes      | ↑           | 0.20  | ENSMUSG00000072734 // ENSMUSG00000033209 | --- // Ttc28     | NA // tetratricopeptide repeat domain 28                                                                  | downstream mmu-mir-701    |
| 161     | 1    | 160288942 | 160289246 | 305   | No               | Yes      | No       | Yes      | ↑           | 0.20  | ENSMUSG0000004031                        | Fam5b            | family with sequence similarity 5, member B                                                               | upstream mmu-mir-488      |
| 1375    | 15   | 68012383  | 68012847  | 465   | No               | Yes      | No       | Yes      | ↑           | 0.20  | ENSMUSG00000022335                       | Zfat             | zinc finger and AT hook domain containing                                                                 | downstream mmu-mir-30b    |
| 1169    | 14   | 34899322  | 34899697  | 376   | No               | Yes      | No       | Yes      | ↑           | 0.20  | ENSMUSG00000021950                       | Anxa8            | annexin A8                                                                                                | upstream mmu-mir-346      |
| 2069    | 19   | 44618003  | 44618500  | 498   | No               | Yes      | No       | Yes      | ↑           | 0.20  | ENSMUSG00000051984                       | Sec31b           | Sec31 homolog B (S. cerevisiae)                                                                           | downstream mmu-mir-5114   |
| 46      | 1    | 56693175  | 56693340  | 166   | No               | Yes      | No       | Yes      | ↑           | 0.20  | ENSMUSG00000045336                       | Hsfy2            | heat shock transcription factor, Y linked 2                                                               | downstream mmu-mir-1928   |
| 141     | 1    | 152270670 | 152270996 | 327   | No               | Yes      | No       | Yes      | ↑           | 0.20  | ENSMUSG00000006010 // ENSMUSG00000006005 | BC003331 // Tpr  | cDNA sequence BC003331 // translocated promoter region                                                    | upstream mmu-mir-488      |
| 456     | 10   | 121044448 | 121044882 | 435   | No               | Yes      | No       | Yes      | ↑           | 0.21  | ENSMUSG00000034667                       | Xpot             | exportin, tRNA (nuclear export receptor for tRNAs)                                                        | upstream mmu-mir-763      |
| 801     | 12   | 36818451  | 36818624  | 174   | No               | Yes      | No       | Yes      | ↑           | 0.21  | ENSMUSG00000059301                       | Gm5434           | predicted gene 5434                                                                                       | upstream mmu-mir-5099     |
| 1538    | 16   | 21471098  | 21471306  | 209   | No               | Yes      | No       | Yes      | ↑           | 0.21  | ENSMUSG00000033653                       | Vps8             | vacuolar protein sorting 8 homolog (S. cerevisiae)                                                        | downstream mmu-mir-1224   |
| 3223    | 5    | 147764324 | 147764649 | 326   | No               | Yes      | No       | Yes      | ↑           | 0.21  | ENSMUSG00000016503 // ENSMUSG00000016510 | Gtf3a // Mtif3   | general transcription factor III A // mitochondrial translational initiation factor 3                     | downstream mmu-mir-5105   |
| 2677    | 3    | 151097251 | 151097526 | 276   | No               | Yes      | No       | Yes      | ↑           | 0.21  | ENSMUSG00000039167                       | Elt1             | EGF, latrophilin seven transmembrane domain containing 1                                                  | upstream mmu-mir-3963     |

| reg. ID | Chr. | start     | end       | width | Enrichment meDNA |     |    |     | effect dir. | logFC                                         | ENSEMBL ID          | symbol                                                                                                                             | gene name                 | next miRNA |
|---------|------|-----------|-----------|-------|------------------|-----|----|-----|-------------|-----------------------------------------------|---------------------|------------------------------------------------------------------------------------------------------------------------------------|---------------------------|------------|
|         |      |           |           |       | 5-Htt+/*         | PS  | C  | PS  |             |                                               |                     |                                                                                                                                    |                           |            |
| 1841    | 18   | 34607244  | 34607481  | 238   | No               | Yes | No | Yes |             | 0.21 ENSMUSG00000014503 // ENSMUSG00000036501 | Pkd2l2 // Fam13b    | polycystic kidney disease 2-like 2 // family with sequence similarity 13, member B                                                 | upstream mmu-mir-1949     |            |
|         |      |           |           |       |                  |     |    |     | ↑           |                                               |                     |                                                                                                                                    |                           |            |
| 403     | 10   | 94411381  | 94412198  | 818   | No               | Yes | No | Yes | ↑           | 0.21 ENSMUSG00000074785                       | Plxnc1              | plexin C1                                                                                                                          | downstream mmu-mir-3058   |            |
| 3127    | 5    | 111606607 | 111606774 | 168   | No               | Yes | No | Yes | ↑           | 0.21 ENSMUSG00000072734 // ENSMUSG00000033209 | --- // Ttc28        | NA // tetratricopeptide repeat domain 28                                                                                           | downstream mmu-mir-701    |            |
|         |      |           |           |       |                  |     |    |     | ↑           |                                               |                     |                                                                                                                                    |                           |            |
| 1344    | 15   | 27616554  | 27616952  | 399   | No               | Yes | No | Yes | ↑           | 0.21 ENSMUSG00000056069                       | Fam105a             | family with sequence similarity 105, member A                                                                                      | downstream mmu-mir-3964   |            |
| 2399    | 2    | 168808365 | 168808848 | 484   | No               | Yes | No | Yes | ↑           | 0.22 ENSMUSG00000027551                       | Zfp64               | zinc finger protein 64                                                                                                             | downstream mmu-mir-296    |            |
| 3174    | 5    | 125255372 | 125256056 | 685   | No               | Yes | No | Yes | ↑           | 0.22 ENSMUSG00000051869                       | ---                 | NA                                                                                                                                 | upstream mmu-mir-3965     |            |
| 2118    | 19   | 58744425  | 58744760  | 336   | No               | Yes | No | Yes | ↑           | 0.22 ENSMUSG00000046008                       | Pnlip               | pancreatic lipase                                                                                                                  | downstream mmu-mir-3086   |            |
| 2261    | 2    | 91288835  | 91289186  | 352   | No               | Yes | No | Yes | ↑           | 0.22 ENSMUSG00000040591                       | 1110051M20Rik       | RIKEN cDNA 1110051M20 gene                                                                                                         | upstream mmu-mir-1955     |            |
| 3066    | 5    | 86627049  | 86627217  | 169   | No               | Yes | No | Yes | ↑           | 0.22 ENSMUSG00000029255                       | Gnrhr               | gonadotropin releasing hormone receptor                                                                                            | downstream mmu-mir-3969   |            |
| 769     | 11   | 120481709 | 120482018 | 310   | No               | Yes | No | Yes | ↑           | 0.22 ENSMUSG00000025137 // ENSMUSG00000025138 | Pcyt2 // Sirt7      | phosphate cytidyltransferase 2, ethaNolamine // sirtuin 7 (silent mating type information regulation 2, homolog) 7 (S. cerevisiae) | upstream mmu-mir-338      |            |
|         |      |           |           |       |                  |     |    |     | ↑           |                                               |                     |                                                                                                                                    |                           |            |
| 1797    | 17   | 80743120  | 80743409  | 290   | No               | Yes | No | Yes | ↑           | 0.23 ENSMUSG00000054901                       | Arhgef33            | Rho guanine nucleotide exchange factor (GEF) 33                                                                                    | upstream mmu-mir-1195     |            |
| 949     | 13   | 26405315  | 26406249  | 935   | No               | Yes | No | Yes | ↑           | 0.23 ENSMUSG00000084358                       | Gm11352             | predicted gene 11352                                                                                                               | upstream mmu-mir-1983     |            |
| 1428    | 15   | 84176876  | 84177219  | 344   | No               | Yes | No | Yes | ↑           | 0.24 ENSMUSG00000022439                       | Parvg               | parvin, gamma                                                                                                                      | downstream mmu-mir-1249   |            |
| 216     | 1    | 186630697 | 186631016 | 320   | No               | Yes | No | Yes | ↑           | 0.24 ENSMUSG00000026621                       | Mosc1               | MOCO sulphurase C-terminal domain containing 1                                                                                     | downstream mmu-mir-1981   |            |
| 1940    | 18   | 79055340  | 79055802  | 463   | No               | Yes | No | Yes | ↑           | 0.24 ENSMUSG00000024548                       | Setbp1              | SET binding protein 1                                                                                                              | downstream mmu-mir-5127   |            |
| 3837    | 8    | 91572848  | 91573302  | 455   | No               | Yes | No | Yes | ↑           | 0.24 ENSMUSG00000031665                       | Sall1               | sal-like 1 (Drosophila)                                                                                                            | upstream mmu-mir-3074-2   |            |
| 136     | 1    | 141373967 | 141374280 | 314   | No               | Yes | No | Yes | ↑           | 0.24 ENSMUSG00000033952                       | Aspm                | asp (abNormal spindle)-like, microcephaly associated (Drosophila)                                                                  | downstream mmu-mir-181b-1 |            |
|         |      |           |           |       |                  |     |    |     | ↑           |                                               |                     |                                                                                                                                    |                           |            |
| 2442    | 3    | 14628742  | 14628985  | 244   | No               | Yes | No | Yes | ↑           | 0.24 ENSMUSG00000027555                       | Car13               | carbonic anhydrase 13                                                                                                              | upstream mmu-mir-124-2    |            |
| 2913    | 4    | 141477891 | 141478291 | 401   | No               | Yes | No | Yes | ↑           | 0.24 ENSMUSG00000040659 // ENSMUSG00000051435 | Efh2 // Fhad1       | EF hand domain containing 2 // forkhead-associated (FHA) phosphopeptide binding domain 1                                           | upstream mmu-mir-2139     |            |
|         |      |           |           |       |                  |     |    |     | ↑           |                                               |                     |                                                                                                                                    |                           |            |
| 739     | 11   | 113569751 | 113569968 | 218   | No               | Yes | No | Yes | ↑           | 0.24 ENSMUSG00000018727                       | Cpsf4l              | cleavage and polyadenylation specific factor 4-like                                                                                | downstream mmu-mir-3968   |            |
| 2405    | 2    | 170286863 | 170287060 | 198   | No               | Yes | No | Yes | ↑           | 0.24 ENSMUSG00000084067                       | Gm14269             | predicted gene 14269                                                                                                               | downstream mmu-mir-296    |            |
| 3086    | 5    | 93026098  | 93026452  | 355   | No               | Yes | No | Yes | ↑           | 0.24 ENSMUSG00000047963                       | Stbd1               | starch binding domain 1                                                                                                            | downstream mmu-mir-1961   |            |
| 1471    | 15   | 96850052  | 96850679  | 628   | No               | Yes | No | Yes | ↑           | 0.24 ENSMUSG00000022464                       | Slc38a4             | solute carrier family 38, member 4                                                                                                 | upstream mmu-mir-1941     |            |
| 2328    | 2    | 145756087 | 145756327 | 241   | No               | Yes | No | Yes | ↑           | 0.25 ENSMUSG00000001767                       | Crnk1l              | Crn, crooked neck-like 1 (Drosophila)                                                                                              | downstream mmu-mir-1953   |            |
| 4110    | 9    | 110701490 | 110701942 | 453   | No               | Yes | No | Yes | ↑           | 0.25 ENSMUSG00000044664                       | Prss42              | protease, serine, 42                                                                                                               | downstream mmu-mir-128-2  |            |
| 2461    | 3    | 32380257  | 32380445  | 189   | No               | Yes | No | Yes | ↑           | 0.25 ENSMUSG00000027667                       | Zfp639              | zinc finger protein 639                                                                                                            | upstream mmu-mir-1897     |            |
| 615     | 11   | 71849915  | 71850521  | 607   | No               | Yes | No | Yes | ↑           | 0.25 ENSMUSG00000040554                       | Aipl1               | aryl hydrocarbon receptor-interacting protein-like 1                                                                               | downstream mmu-mir-195    |            |
| 2177    | 2    | 38849157  | 38849619  | 463   | No               | Yes | No | Yes | ↑           | 0.26 ENSMUSG00000035295                       | Wdr38               | WD repeat domain 38                                                                                                                | downstream mmu-mir-181b-2 |            |
| 309     | 10   | 43164353  | 43164583  | 231   | No               | Yes | No | Yes | ↑           | 0.26 ENSMUSG00000069885                       | ---                 | NA                                                                                                                                 | upstream mmu-mir-1929     |            |
| 2970    | 5    | 23758541  | 23758994  | 454   | No               | Yes | No | Yes | ↑           | 0.26 ENSMUSG00000049380                       | ---                 | NA                                                                                                                                 | upstream mmu-mir-671      |            |
| 379     | 10   | 86298512  | 86298902  | 391   | No               | Yes | No | Yes | ↑           | 0.26 ENSMUSG00000080679 // ENSMUSG00000054027 | --- // Nt5dc3       | NA // 5'-nucleotidase domain containing 3                                                                                          | downstream mmu-mir-135a-2 |            |
|         |      |           |           |       |                  |     |    |     | ↑           |                                               |                     |                                                                                                                                    |                           |            |
| 3091    | 5    | 100037981 | 100038156 | 176   | No               | Yes | No | Yes | ↑           | 0.26 ENSMUSG00000029331 // ENSMUSG00000056908 | 4930522N08Rik // -- | RIKEN cDNA 4930522N08 gene // NA                                                                                                   | upstream mmu-mir-703      |            |
|         |      |           |           |       |                  |     |    |     | ↑           |                                               |                     |                                                                                                                                    |                           |            |
| 3152    | 5    | 116457782 | 116458147 | 366   | No               | Yes | No | Yes | ↑           | 0.26 ENSMUSG00000029513 // ENSMUSG00000029516 | Prkab1 // Cit       | protein kinase, AMP-activated, beta 1 Non-catalytic subunit // citron                                                              | downstream mmu-mir-701    |            |
|         |      |           |           |       |                  |     |    |     | ↑           |                                               |                     |                                                                                                                                    |                           |            |

| reg. ID | Chr. | start     | end       | width | Enrichment meDNA |     |          |     | effect dir. | logFC | ENSEMBL ID                                                     | symbol                     | gene name                                                                                 | next miRNA                |
|---------|------|-----------|-----------|-------|------------------|-----|----------|-----|-------------|-------|----------------------------------------------------------------|----------------------------|-------------------------------------------------------------------------------------------|---------------------------|
|         |      |           |           |       | 5-Htt+/*         |     | 5-Htt+/- |     |             |       |                                                                |                            |                                                                                           |                           |
|         |      |           |           |       | C                | PS  | C        | PS  |             |       |                                                                |                            |                                                                                           |                           |
| 965     | 13   | 41091308  | 41091547  | 240   | No               | Yes | No       | Yes | ↑           | 0.26  | ENSMUSG00000038683                                             | Pak1ip1                    | PAK1 interacting protein 1                                                                | downstream mmu-mir-5124   |
| 458     | 10   | 122443012 | 122443256 | 245   | No               | Yes | No       | Yes |             | 0.26  | ENSMUSG00000065406 // ENSMUSG00000034602                       | Mirlet7i // Mon2           | microRNA let7i // MON2 homolog (yeast)                                                    | upstream mmu-let-7i       |
| 1378    | 15   | 71140169  | 71140406  | 238   | No               | Yes | No       | Yes | ↑           | 0.27  | ENSMUSG00000036800                                             | Fam135b                    | family with sequence similarity 135, member B                                             | downstream mmu-mir-151    |
| 1503    | 15   | 100131133 | 100131965 | 833   | No               | Yes | No       | Yes | ↑           | 0.27  | ENSMUSG00000054619                                             | Mettl7a1                   | methyltransferase like 7A1                                                                | upstream mmu-mir-1941     |
| 1187    | 14   | 47689339  | 47689594  | 256   | No               | Yes | No       | Yes |             | 0.28  | ENSMUSG00000072589 // ENSMUSG00000021838                       | Gm10371 // Samd4           | predicted gene 10371 // sterile alpha motif domain containing 4                           | upstream mmu-mir-5131     |
| 1472    | 15   | 96855601  | 96855851  | 251   | No               | Yes | No       | Yes | ↑           | 0.28  | ENSMUSG00000022464                                             | Slc38a4                    | solute carrier family 38, member 4                                                        | upstream mmu-mir-1941     |
| 2089    | 19   | 51866739  | 51867081  | 343   | No               | Yes | No       | Yes | ↑           | 0.28  | ENSMUSG00000035804                                             | Ins1                       | insulin I                                                                                 | downstream mmu-mir-146b   |
| 795     | 12   | 31947546  | 31947788  | 243   | No               | Yes | No       | Yes | ↑           | 0.28  | ENSMUSG00000002900                                             | Lamb1                      | laminin B1                                                                                | downstream mmu-mir-680-3  |
| 2976    | 5    | 30428904  | 30429154  | 251   | No               | Yes | No       | Yes | ↑           | 0.29  | ENSMUSG00000044576                                             | Fam59b                     | family with sequence similarity 59, member B                                              | upstream mmu-mir-1960     |
| 1825    | 18   | 9909611   | 9910137   | 527   | No               | Yes | No       | Yes | ↑           | 0.29  | ENSMUSG00000073635                                             | ---                        | NA                                                                                        | downstream mmu-mir-133a-1 |
| 3528    | 7    | 48745656  | 48746308  | 653   | No               | Yes | No       | Yes |             | 0.29  | ENSMUSG00000083500 // ENSMUSG00000074166 // ENSMUSG00000074160 | Gm15470 // AW146154 // --- | predicted gene 15470 // expressed sequence AW146154                                       | upstream mmu-mir-707      |
| 2517    | 3    | 79206063  | 79206308  | 246   | No               | Yes | No       | Yes | ↑           | 0.29  | ENSMUSG00000061175                                             | Frip2                      | folliculin interacting protein 2                                                          | upstream mmu-mir-466k     |
| 1682    | 17   | 25995934  | 25996276  | 343   | No               | Yes | No       | Yes | ↑           | 0.30  | ENSMUSG00000073434                                             | Wdr90                      | WD repeat domain 90                                                                       | upstream mmu-mir-3082     |
| 4001    | 9    | 50919228  | 50919520  | 293   | No               | Yes | No       | Yes | ↑           | 0.30  | ENSMUSG00000032056                                             | Btg4                       | B cell translocation gene 4                                                               | upstream mmu-mir-34b      |
| 2267    | 2    | 102295770 | 102296667 | 898   | No               | Yes | No       | Yes | ↑           | 0.30  | ENSMUSG00000075012                                             | Fjx1                       | four jointed box 1 (Drosophila)                                                           | downstream mmu-mir-1902   |
| 682     | 11   | 99146952  | 99147182  | 231   | No               | Yes | No       | Yes | ↑           | 0.30  | ENSMUSG00000020913                                             | Krt24                      | keratin 24                                                                                | downstream mmu-mir-5119   |
| 2816    | 4    | 107381184 | 107381320 | 137   | No               | Yes | No       | Yes | ↑           | 0.30  | ENSMUSG00000080460                                             | ---                        | NA                                                                                        | upstream mmu-mir-761      |
| 1178    | 14   | 37912666  | 37913077  | 412   | No               | Yes | No       | Yes | ↑           | 0.30  | ENSMUSG00000021803                                             | Cdhr1                      | cadherin-related family member 1                                                          | downstream mmu-mir-346    |
| 1404    | 15   | 79436710  | 79436978  | 269   | No               | Yes | No       | Yes |             | 0.30  | ENSMUSG00000022429                                             | Dmc1                       | DMC1 dosage suppressor of mck1 homolog, meiosis-specific homologous recombination (yeast) | upstream mmu-mir-1943     |
| 3598    | 7    | 107672495 | 107672817 | 323   | No               | Yes | No       | Yes | ↑           | 0.31  | ENSMUSG00000030708                                             | Dnajb13                    | Dnaj (Hsp40) related, subfamily B, member 13                                              | downstream mmu-mir-3102   |
| 2314    | 2    | 129925284 | 129926709 | 1426  | No               | Yes | No       | Yes |             | 0.31  | ENSMUSG00000074804 // ENSMUSG00000081387                       | AU015228 // ---            | expressed sequence AU015228 // NA                                                         | upstream mmu-mir-103-2    |
| 1023    | 13   | 59818518  | 59818830  | 313   | No               | Yes | No       | Yes | ↑           | 0.31  | ENSMUSG00000043986                                             | 4932411G14Rik              | RIKEN cDNA 4932411G14 gene                                                                | upstream mmu-mir-7a-1     |
| 707     | 11   | 102341776 | 102341987 | 212   | No               | Yes | No       | Yes |             | 0.31  | ENSMUSG00000050324 // ENSMUSG00000034621                       | --- // Gpatch8             | NA // G patch domain containing 8                                                         | downstream mmu-mir-5119   |
| 265     | 10   | 18980753  | 18982015  | 1263  | No               | Yes | No       | Yes | ↑           | 0.32  | ENSMUSG00000045591                                             | Olig3                      | oligodendrocyte transcription factor 3                                                    | downstream mmu-mir-5104   |
| 3279    | 6    | 36474804  | 36475007  | 204   | No               | Yes | No       | Yes | ↑           | 0.32  | ENSMUSG00000045613                                             | Chrm2                      | cholinergic receptor, muscarinic 2, cardiac                                               | downstream mmu-mir-490    |
| 1709    | 17   | 35021281  | 35021725  | 445   | No               | Yes | No       | Yes | ↑           | 0.33  | ENSMUSG00000024372                                             | ---                        | NA                                                                                        | upstream mmu-mir-219-1    |
| 4151    | 9    | 123892333 | 123892750 | 418   | No               | Yes | No       | Yes | ↑           | 0.33  | ENSMUSG00000064039                                             | Ccr11                      | chemokine (C-C motif) receptor 1-like 1                                                   | downstream mmu-mir-138-1  |
| 1347    | 15   | 31378527  | 31378689  | 163   | No               | Yes | No       | Yes |             | 0.34  | ENSMUSG00000068964 // ENSMUSG00000022236                       | Gm6361 // Ropn1            | predicted gene 6361 // ropporin 1-like                                                    | upstream mmu-mir-3964     |
| 1653    | 17   | 4880676   | 4881955   | 1280  | No               | Yes | No       | Yes | ↑           | 0.34  | ENSMUSG00000073473                                             | ---                        | NA                                                                                        | downstream mmu-mir-692-1  |
| 3523    | 7    | 36900763  | 36901209  | 447   | No               | Yes | No       | Yes | ↑           | 0.34  | ENSMUSG00000066543                                             | Gm10166                    | predicted pseudogene 10166                                                                | downstream mmu-mir-1964   |
| 338     | 10   | 67498813  | 67499010  | 198   | No               | Yes | No       | Yes | ↑           | 0.34  | ENSMUSG00000037846                                             | Rtkn2                      | rhotekin 2                                                                                | downstream mmu-mir-5108   |
| 3397    | 6    | 118472562 | 118473155 | 594   | No               | Yes | No       | Yes | ↑           | 0.34  | ENSMUSG00000007827                                             | Ankrd26                    | ankyrin repeat domain 26                                                                  | downstream mmu-mir-706    |
| 2696    | 4    | 5568113   | 5568422   | 310   | No               | Yes | No       | Yes | ↑           | 0.34  | ENSMUSG00000049119                                             | Fam110b                    | family with sequence similarity 110, member B                                             | downstream mmu-mir-3471-2 |

| reg_ID | Chr. | start     | end       | width | Enrichment meDNA |     |          |     | effect dir. | logFC | ENSEMBL ID                                | symbol                    | gene name                                                                                              | next miRNA                 |
|--------|------|-----------|-----------|-------|------------------|-----|----------|-----|-------------|-------|-------------------------------------------|---------------------------|--------------------------------------------------------------------------------------------------------|----------------------------|
|        |      |           |           |       | 5-Htt+/*         |     | 5-Htt+/- |     |             |       |                                           |                           |                                                                                                        |                            |
|        |      |           |           |       | C                | PS  | C        | PS  |             |       |                                           |                           |                                                                                                        |                            |
| 2593   | 3    | 102880788 | 102881130 | 343   | No               | Yes | No       | Yes | ↑           | 0.34  | ENSMUSG00000070385                        | Ampd1                     | adeNosine moNophosphate deaminase 1                                                                    | upstream mmu-mir-669n      |
| 1159   | 14   | 33480197  | 33480398  | 202   | No               | Yes | No       | Yes | ↑           | 0.35  | ENSMUSG00000071540                        | 3425401B19Rik             | RIKEN cDNA 3425401B19 gene                                                                             | downstream mmu-mir-3076    |
| 2436   | 3    | 9072303   | 9072844   | 542   | No               | Yes | No       | Yes | ↑           | 0.35  | ENSMUSG00000056797                        | Gm4889                    | predicted gene 4889                                                                                    | upstream mmu-mir-124-2     |
| 1058   | 13   | 93345166  | 93345552  | 387   | No               | Yes | No       | Yes | ↑           | 0.35  | ENSMUSG00000046957                        | Spz1                      | spermatogenic leucine zipper 1                                                                         | upstream mmu-mir-5624      |
| 1685   | 17   | 28620956  | 28621127  | 172   | No               | Yes | No       | Yes | ↑           | 0.35  | ENSMUSG00000024222                        | Fkbp5                     | FK506 binding protein 5                                                                                | upstream mmu-mir-3083      |
| 2964   | 5    | 8792216   | 8792537   | 322   | No               | Yes | No       | Yes | ↑           | 0.36  | ENSMUSG00000028970                        | Abcb1b                    | ATP-binding cassette, sub-family B (MDR/TAP), member 1B                                                | upstream mmu-mir-879       |
| 2670   | 3    | 146353374 | 146353549 | 176   | No               | Yes | No       | Yes | ↑           | 0.37  | ENSMUSG00000048652                        | Samd13                    | sterile alpha motif domain containing 13                                                               | downstream mmu-mir-3963    |
| 337    | 10   | 67489441  | 67489693  | 253   | No               | Yes | No       | Yes | ↑           | 0.37  | ENSMUSG00000037846                        | Rtkn2                     | rhotekin 2                                                                                             | downstream mmu-mir-5108    |
| 1826   | 18   | 13056787  | 13057336  | 550   | No               | Yes | No       | Yes | ↑           | 0.37  | ENSMUSG00000080866 // ENSMUSG00000044252  | Gm5687 // Osbpl1a         | predicted gene 5687 // oxysterol binding protein-like 1A                                               | downstream mmu-mir-1948    |
| 3854   | 8    | 99951047  | 99951637  | 591   | No               | Yes | No       | Yes | ↑           | 0.38  | ENSMUSG00000081111                        | Gm5913                    | predicted gene 5913                                                                                    | downstream mmu-mir-1186b   |
| 192    | 1    | 173168306 | 173168720 | 415   | No               | Yes | No       | Yes | ↑           | 0.38  | ENSMUSG00000058715 // ENSMUSG000000013593 | Fcer1g // Ndufs2          | Fc receptor, IgE, high affinity I, gamma polypeptide // NADH dehydrogenase (ubiquinone) Fe-S protein 2 | downstream mmu-mir-350     |
| 2784   | 4    | 83303475  | 83303838  | 364   | No               | Yes | No       | Yes | ↑           | 0.38  | ENSMUSG00000080793 // ENSMUSG00000052407  | Cbx3-ps3 // 4930473A06Rik | chromobox homolog 3 (Drosophila HP1 gamma), pseudogene 3 // RIKEN cDNA 4930473A06 gene                 | upstream mmu-mir-491       |
| 1335   | 15   | 12755943  | 12756295  | 353   | No               | Yes | No       | Yes | ↑           | 0.39  | ENSMUSG00000022191                        | Drosha                    | drosha, ribonuclease type III                                                                          | downstream mmu-mir-1898    |
| 2808   | 4    | 104549913 | 104550111 | 199   | No               | Yes | No       | Yes | ↑           | 0.39  | ENSMUSG00000035031                        | C8a                       | complement component 8, alpha polypeptide                                                              | upstream mmu-mir-101a      |
| 2863   | 4    | 128291909 | 128292687 | 779   | No               | Yes | No       | Yes | ↑           | 0.39  | ENSMUSG00000062545                        | Tlr12                     | toll-like receptor 12                                                                                  | downstream mmu-mir-692-2.1 |
| 259    | 10   | 14466914  | 14467435  | 522   | No               | Yes | No       | Yes | ↑           | 0.39  | ENSMUSG00000059814                        | ---                       | NA                                                                                                     | downstream mmu-mir-5104    |
| 1495   | 15   | 99050982  | 99051487  | 506   | No               | Yes | No       | Yes | ↑           | 0.39  | ENSMUSG00000037579                        | Kcnh3                     | potassium voltage-gated channel, subfamily H (eag-related), member 3                                   | upstream mmu-mir-1941      |
| 212    | 1    | 184246716 | 184247109 | 394   | No               | Yes | No       | Yes | ↑           | 0.40  | ENSMUSG00000047539                        | Fbxo28                    | F-box protein 28                                                                                       | downstream mmu-mir-1981    |
| 1011   | 13   | 55749228  | 55749440  | 213   | No               | Yes | No       | Yes | ↑           | 0.41  | ENSMUSG00000021500                        | Ddx46                     | DEAD (Asp-Glu-Ala-Asp) box polypeptide 46                                                              | downstream mmu-mir-874     |
| 2031   | 19   | 37619145  | 37619409  | 265   | No               | Yes | No       | Yes | ↑           | 0.41  | ENSMUSG00000053799                        | Exoc6                     | exocyst complex component 6                                                                            | downstream mmu-mir-1950    |
| 913    | 12   | 113218228 | 113218501 | 274   | No               | Yes | No       | Yes | ↑           | 0.41  | ENSMUSG00000021290                        | 2010107E04Rik             | RIKEN cDNA 2010107E04 gene                                                                             | upstream mmu-mir-3073      |
| 2615   | 3    | 122815622 | 122815945 | 324   | No               | Yes | No       | Yes | ↑           | 0.43  | ENSMUSG00000028116 // ENSMUSG00000050315  | Myoz2 // Synpo2           | myozenin 2 // synaptopodin 2                                                                           | upstream mmu-mir-760       |
| 2902   | 4    | 139161007 | 139161329 | 323   | No               | Yes | No       | Yes | ↑           | 0.44  | ENSMUSG00000028737 // ENSMUSG000000041025 | Aldh4a1 // Iffo2          | aldehyde dehydrogenase 4 family, member A1 // intermediate filament family orphan 2                    | downstream mmu-mir-2139    |
| 1731   | 17   | 44327479  | 44327718  | 240   | No               | Yes | No       | Yes | ↑           | 0.44  | ENSMUSG00000023959                        | Clic5                     | chloride intracellular channel 5                                                                       | upstream mmu-mir-693       |
| 3647   | 7    | 127981617 | 127981784 | 168   | No               | Yes | No       | Yes | ↑           | 0.47  | ENSMUSG00000035064                        | Eef2k                     | eukaryotic elongation factor-2 kinase                                                                  | upstream mmu-mir-762       |
| 3203   | 5    | 139628239 | 139628507 | 269   | No               | Yes | No       | Yes | ↑           | 0.48  | ENSMUSG00000025857                        | Heatr2                    | HEAT repeat containing 2                                                                               | downstream mmu-mir-339     |
| 3622   | 7    | 115413401 | 115413731 | 331   | No               | Yes | No       | Yes | ↑           | 0.50  | ENSMUSG00000060549                        | ---                       | NA                                                                                                     | downstream mmu-mir-139     |
| 557    | 11   | 53915463  | 53915779  | 317   | No               | Yes | No       | Yes | ↑           | 0.50  | ENSMUSG00000018906                        | P4ha2                     | procollagen-proline, 2-oxoglutarate 4-dioxygenase (proline 4-hydroxylase), alpha II polypeptide        | downstream mmu-mir-3061    |
| 1078   | 13   | 99259885  | 99260140  | 256   | No               | Yes | No       | Yes | ↑           | 0.50  | ENSMUSG00000071222                        | ---                       | NA                                                                                                     | downstream mmu-mir-1940    |
| 3253   | 6    | 15672786  | 15673027  | 242   | No               | Yes | No       | Yes | ↑           | 0.51  | ENSMUSG00000041390                        | Mdfic                     | MyoD family inhibitor domain containing                                                                | upstream mmu-mir-489       |
| 2278   | 2    | 111840721 | 111841251 | 531   | No               | Yes | No       | Yes | ↑           | 0.51  | ENSMUSG00000081037                        | Gm13929                   | predicted gene 13929                                                                                   | upstream mmu-mir-1951      |
| 1429   | 15   | 84179604  | 84180261  | 658   | No               | Yes | No       | Yes | ↑           | 0.52  | ENSMUSG00000022439                        | Parvg                     | parvin, gamma                                                                                          | downstream mmu-mir-1249    |

C) GxE effects

| reg_ID | Chr.      | start     | end | width | Enrichment meDNA |     |     |    | ENSEMBL ID            | symbol           | gene name                                                                   | next miRNA              |
|--------|-----------|-----------|-----|-------|------------------|-----|-----|----|-----------------------|------------------|-----------------------------------------------------------------------------|-------------------------|
|        |           |           |     |       | 5-Htt+/-         | C   | PS  | C  |                       |                  |                                                                             |                         |
| 12     | 16620450  | 16620622  | 173 | 790   | No               | Yes | Yes | No | ENSMUSG00000020593    | Lpin1            | lipin 1                                                                     | upstream mmu-mir-3066   |
| 1      | 79921439  | 79921674  | 236 | 71    | No               | Yes | Yes | No | ENSMUSG00000067106    | Gm5529           | predicted pseudogene 5529                                                   | upstream mmu-mir-5126   |
| 5      | 24754488  | 24754761  | 274 | 2974  | No               | Yes | Yes | No | ENSMUSG00000054116 // | E130116L18Rik // | RIKEN cDNA E130116L18 gene // UDP-N-acetyl-alpha-D-                         |                         |
| 10     | 68991227  | 68992000  | 774 | 343   | No               | Yes | Yes | No | ENSMUSG00000069601    | Galnt11          | galactosamine:polypeptide N-acetylgalactosaminyltransferase 11              | downstream mmu-mir-671  |
| 2      | 172240549 | 172240961 | 413 | 2410  | No               | Yes | Yes | No | ENSMUSG00000074570    | Ank3             | ankyrin 3, epithelial                                                       | downstream mmu-mir-678  |
| 16     | 85555822  | 85556177  | 356 | 1616  | No               | Yes | Yes | No | ENSMUSG00000041134    | Cass4            | Cas scaffolding protein family member 4                                     | downstream mmu-mir-296  |
| 16     | 59553283  | 59553530  | 248 | 1600  | No               | Yes | Yes | No | ENSMUSG00000022723    | Cypr1            | cysteine and tyrosine-rich protein 1                                        | downstream mmu-mir-155  |
| 9      | 114308807 | 114309002 | 196 | 4116  | No               | Yes | Yes | No | ENSMUSG00000079260    | Crybg3           | beta-gamma crystallin domain containing 3                                   | downstream mmu-mir-5118 |
| 16     | 18326679  | 18326871  | 193 | 1535  | No               | Yes | Yes | No | ENSMUSG00000065464 // | Mir185 //        | microRNA 185 // DNA segment, Chr 16, human D22S680E, expressed              | downstream mmu-mir-185  |
| 10     | 75229253  | 75229611  | 359 | 349   | No               | Yes | Yes | No | ENSMUSG00000020196    | D16H22S680E      | calcineurin binding protein 1                                               | downstream mmu-mir-678  |
| 7      | 108938653 | 108939395 | 743 | 3601  | No               | Yes | Yes | No | ENSMUSG0000007946 //  | Phox2a // Clpb   | paired-like homeobox 2a // ClpB caseinolytic peptidase B homolog (E. coli)  | downstream mmu-mir-139  |
| 8      | 49073362  | 49073530  | 169 | 3800  | No               | Yes | Yes | No | ENSMUSG00000031563    | Wwc2             | WW, C2 and coiled-coil domain containing 2                                  | upstream mmu-mir-383    |
| 5      | 98756166  | 98756519  | 354 | 3087  | No               | Yes | Yes | No | ENSMUSG00000057816    | 1700007G11Rik    | RIKEN cDNA 1700007G11 gene                                                  | downstream mmu-mir-703  |
| 12     | 73763288  | 73763668  | 381 | 837   | No               | Yes | Yes | No | ENSMUSG00000021094    | Dhrs7            | dehydrogenase/reductase (SDR family) member 7                               | upstream mmu-mir-681    |
| 12     | 76275174  | 76275331  | 158 | 843   | No               | Yes | Yes | No | ENSMUSG00000034402    | Kcnh5            | potassium voltage-gated channel, subfamily H (eag-related), member 5        | upstream mmu-mir-5101   |
| 1      | 64660522  | 64661239  | 718 | 60    | No               | Yes | Yes | No | ENSMUSG00000025956    | Mettl21a         | methyltransferase like 21A                                                  | downstream mmu-mir-1928 |
| 6      | 96114742  | 96115018  | 277 | 3365  | No               | Yes | Yes | No | ENSMUSG00000072878 // | 1700123L14Rik // | RIKEN cDNA 1700123L14 gene // family with sequence similarity 19, member A1 | upstream mmu-mir-705    |
| 11     | 117951073 | 117951265 | 193 | 757   | No               | Yes | Yes | No | ENSMUSG00000033987    | Fam19a1          | dynein, axonemal, heavy chain 17                                            | upstream mmu-mir-1932   |
| 7      | 83552619  | 83553367  | 749 | 3574  | No               | Yes | Yes | No | ENSMUSG00000025754    | Dnahc17          | ATP/GTP binding protein-like 1                                              | upstream mmu-mir-7a-2   |
| 9      | 121018331 | 121018670 | 340 | 4147  | No               | Yes | Yes | No | ENSMUSG00000084706 // | // Uik4          | 7SK RNA // unc-51-like kinase 4 (C. elegans)                                | upstream mmu-mir-138-1  |
| 2      | 127514291 | 127514610 | 320 | 2308  | No               | Yes | Yes | No | ENSMUSG00000084006    | Gm14245          | predicted gene 14245                                                        | upstream mmu-mir-103-2  |
| 5      | 104276793 | 104277126 | 334 | 3100  | No               | Yes | Yes | No | ENSMUSG00000029313    | --- // Aff1      | NA // AF4/FMR2 family, member 1                                             | upstream mmu-mir-5619   |
| 7      | 31662811  | 31662985  | 175 | 3518  | No               | Yes | Yes | No | ENSMUSG00000030577    | Cd22             | CD22 antigen                                                                | downstream mmu-mir-1964 |
| 16     | 17113575  | 17113815  | 241 | 1530  | No               | Yes | Yes | No | ENSMUSG00000022771 // | Ppil2 //         | peptidylprolyl isomerase (cyclophilin)-like 2 // RIKEN cDNA 2610318N02      | downstream mmu-mir-130b |
| 12     | 87160119  | 87160359  | 241 | 867   | No               | Yes | Yes | No | ENSMUSG00000021252    | 2610318N02Rik    | gene                                                                        | downstream mmu-mir-3068 |
| 11     | 22523259  | 22523680  | 422 | 506   | No               | Yes | Yes | No | ENSMUSG00000083008    | 0610007P14Rik    | RIKEN cDNA 0610007P14 gene                                                  | upstream mmu-mir-1933   |
| 15     | 88586607  | 88586808  | 202 | 1437  | No               | Yes | Yes | No | ENSMUSG00000034333    | Gm12053          | predicted gene 12053                                                        | downstream mmu-let-7b   |
| 13     | 64374026  | 64374926  | 901 | 1031  | No               | Yes | Yes | No | ENSMUSG00000033102    | Zbed4            | zinc finger, BED domain containing 4                                        | upstream mmu-mir-3074-1 |

| reg. ID | Chr.      | start     | end | width | Enrichment meDNA |          |     |    | ENSEMBL ID                                  | symbol                | gene name                                                                                        | next miRNA               |
|---------|-----------|-----------|-----|-------|------------------|----------|-----|----|---------------------------------------------|-----------------------|--------------------------------------------------------------------------------------------------|--------------------------|
|         |           |           |     |       | 5-Htt+/+         | 5-Htt+/- | C   | PS |                                             |                       |                                                                                                  |                          |
| 7       | 138758514 | 138758684 | 171 | 3672  | No               | Yes      | Yes | No | ENSMUSG00000062758                          | Gm16477               | predicted pseudogene 16477                                                                       | downstream mmu-mir-5102  |
| 10      | 80635352  | 80635568  | 217 | 363   | No               | Yes      | Yes | No | ENSMUSG00000034994                          | Eef2                  | eukaryotic translation elongation factor 2                                                       | upstream mmu-mir-5615-1  |
| 6       | 31998322  | 31998560  | 239 | 3269  | No               | Yes      | Yes | No | ENSMUSG00000029766                          | 1700012A03Rik         | RIKEN cDNA 1700012A03 gene                                                                       | upstream mmu-mir-29b-1   |
| 3       | 37614766  | 37615043  | 278 | 2469  | No               | Yes      | Yes | No | ENSMUSG00000081549 //<br>ENSMUSG00000058174 | --- // Gm5148         | NA // predicted gene 5148                                                                        | downstream mmu-mir-1897  |
| 6       | 38063999  | 38064610  | 612 | 3282  | No               | Yes      | Yes | No | ENSMUSG00000029829 //                       | Tmem213 //            | transmembrane protein 213 // ATPase, H+ transporting, lysosomal V0 subunit A4                    | downstream mmu-mir-490   |
| 19      | 38168221  | 38168446  | 226 | 2036  | No               | Yes      | Yes | No | ENSMUSG00000054200                          | O3far1                | omega-3 fatty acid receptor 1                                                                    | downstream mmu-mir-1950  |
| 3       | 153507764 | 153508069 | 306 | 2687  | No               | Yes      | Yes | No | ENSMUSG00000038997                          | Asb17                 | ankyrin repeat and SOCS box-containing 17                                                        | upstream mmu-mir-3963    |
| 5       | 66362494  | 66362774  | 281 | 3024  | No               | Yes      | Yes | No | ENSMUSG00000029205                          | Chrna9                | cholinergic receptor, nicotinic, alpha polypeptide 9                                             | downstream mmu-mir-574   |
| 14      | 64125316  | 64125620  | 305 | 1232  | No               | Yes      | Yes | No | ENSMUSG00000021953                          | Tdh                   | L-threonine dehydrogenase                                                                        | upstream mmu-mir-598     |
| 14      | 54420660  | 54420948  | 289 | 1205  | No               | Yes      | Yes | No | ENSMUSG00000076860                          | ---                   | NA                                                                                               | downstream mmu-mir-686   |
| 12      | 106889441 | 106889717 | 277 | 891   | No               | Yes      | Yes | No | ENSMUSG00000041341                          | Atg2b                 | ATG2 autophagy related 2 homolog B (S. cerevisiae)                                               | upstream mmu-mir-3069    |
| 14      | 50939884  | 50940224  | 341 | 1194  | No               | Yes      | Yes | No | ENSMUSG00000045306                          | Olfir734              | olfactory receptor 734                                                                           | downstream mmu-mir-686   |
| 8       | 87890113  | 87890452  | 340 | 3833  | No               | Yes      | Yes | No | ENSMUSG00000031698                          | Mylk3                 | myosin light chain kinase 3                                                                      | upstream mmu-mir-3074-2  |
| 5       | 103851411 | 103851650 | 240 | 3095  | No               | Yes      | Yes | No | ENSMUSG00000034573                          | Ptpn13                | protein tyrosine phosphatase, Non-receptor type 13                                               | upstream mmu-mir-5619    |
| 5       | 77941031  | 77941489  | 459 | 3063  | No               | Yes      | Yes | No | ENSMUSG00000047652                          | Pea15b                | phosphoprotein enriched in astrocytes 15B                                                        | downstream mmu-mir-5098  |
| 8       | 86065508  | 86065826  | 319 | 3830  | No               | Yes      | Yes | No | ENSMUSG00000047286                          | Olfir370              | olfactory receptor 370                                                                           | downstream mmu-mir-1199  |
| 9       | 120244802 | 120245088 | 287 | 4145  | No               | Yes      | Yes | No | ENSMUSG00000083772 //<br>ENSMUSG00000041794 | Gm15566 // Myrip      | predicted gene 15566 // myosin VIIA and Rab interacting protein                                  | downstream mmu-mir-26a-1 |
| 4       | 138382101 | 138382425 | 325 | 2896  | No               | Yes      | Yes | No | ENSMUSG00000058908 //<br>ENSMUSG00000041193 | Pla2g2a // Pla2g5     | phospholipase A2, group IIA (platelets, syNovial fluid) // phospholipase A2, group V             | downstream mmu-mir-2139  |
| 6       | 142523491 | 142523690 | 200 | 3446  | No               | Yes      | Yes | No | ENSMUSG00000030247                          | Kcnj8                 | potassium inwardly-rectifying channel, subfamily J, member 8                                     | downstream mmu-mir-680-1 |
| 6       | 38143282  | 38143563  | 282 | 3283  | No               | Yes      | Yes | No | ENSMUSG00000063455                          | D630045J12Rik         | RIKEN cDNA D630045J12 gene                                                                       | downstream mmu-mir-490   |
| 8       | 119025770 | 119026177 | 408 | 3893  | No               | Yes      | Yes | No | ENSMUSG00000034467                          | Dynlrb2               | dynein light chain roadblock-type 2                                                              | upstream mmu-mir-3473d   |
| 2       | 52962557  | 52962757  | 201 | 2185  | No               | Yes      | Yes | No | ENSMUSG00000061136 //<br>ENSMUSG00000036053 | Prpf40a // Fmnl2      | PRP40 pre-mRNA processing factor 40 homolog A (yeast) // formin-like 2                           | upstream mmu-mir-5129    |
| 15      | 100256718 | 100257551 | 834 | 1506  | No               | Yes      | Yes | No | ENSMUSG00000023030                          | Slc11a2               | solute carrier family 11 (proton-coupled divalent metal ion transporters), member 2              | upstream mmu-mir-1941    |
| 7       | 74881586  | 74881908  | 323 | 3569  | No               | Yes      | Yes | No | ENSMUSG00000070514 //<br>ENSMUSG00000030554 | ---                   | NA // synemin, intermediate filament protein                                                     | downstream mmu-mir-211   |
| 5       | 123745990 | 123746262 | 273 | 3166  | No               | Yes      | Yes | No | ENSMUSG00000029442                          | ---                   | NA // WD repeat domain 66                                                                        | upstream mmu-mir-3965    |
| 7       | 54224905  | 54225077  | 173 | 3551  | No               | Yes      | Yes | No | ENSMUSG00000043262                          | Uevld                 | UEV and lactate/malate dehydrogenase domains                                                     | upstream mmu-mir-5121    |
| 18      | 78340511  | 78340723  | 213 | 1939  | No               | Yes      | Yes | No | ENSMUSG00000059336                          | Slc14a1               | solute carrier family 14 (urea transporter), member 1                                            | downstream mmu-mir-5127  |
| 11      | 94340542  | 94340847  | 306 | 659   | No               | Yes      | Yes | No | ENSMUSG00000020866 //<br>ENSMUSG00000020867 | Cacna1g //<br>Spata20 | calcium channel, voltage-dependent, T type, alpha 1G subunit //<br>spermatogenesis associated 20 | downstream mmu-mir-3063  |
| 3       | 108645343 | 108645923 | 581 | 2604  | No               | Yes      | Yes | No | ENSMUSG00000027882                          | Stxbp3a               | syntaxin binding protein 3A                                                                      | upstream mmu-mir-669n    |
| 18      | 50438458  | 50438693  | 236 | 1886  | No               | Yes      | Yes | No | ENSMUSG00000035420                          | Fam170a               | family with sequence similarity 170, member A                                                    | downstream mmu-mir-5097  |
| 11      | 55418779  | 55418960  | 182 | 562   | No               | Yes      | Yes | No | ENSMUSG00000000263                          | Gira1                 | glycine receptor, alpha 1 subunit                                                                | downstream mmu-mir-3061  |

| reg. ID               | Chr.      | start     | end | width | Enrichment meDNA |          |     |    | ENSEMBL ID         | symbol                         | gene name                                                                              | next miRNA                |
|-----------------------|-----------|-----------|-----|-------|------------------|----------|-----|----|--------------------|--------------------------------|----------------------------------------------------------------------------------------|---------------------------|
|                       |           |           |     |       | 5-Htt+/+         | 5-Htt+/- | C   | PS |                    |                                |                                                                                        |                           |
| 1                     | 153618252 | 153618453 | 202 | 147   | No               | Yes      | Yes | No | ENSMUSG00000043019 | Edem3                          | ER degradation enhancer, mannosidase alpha-like 3                                      | upstream mmu-mir-488      |
| 9                     | 115315905 | 115316202 | 298 | 4124  | No               | Yes      | Yes | No | ENSMUSG00000080344 | ---                            | NA                                                                                     | downstream mmu-mir-467h   |
| 19                    | 47770767  | 47771532  | 766 | 2080  | No               | Yes      | Yes | No | ENSMUSG00000025064 | Col17a1                        | collagen, type XVII, alpha 1                                                           | downstream mmu-mir-146b   |
| 5                     | 66361850  | 66362047  | 198 | 3023  | No               | Yes      | Yes | No | ENSMUSG00000029205 | Chrna9                         | cholinergic receptor, nicotinic, alpha polypeptide 9                                   | downstream mmu-mir-574    |
| ENSMUSG00000084481 // |           |           |     |       |                  |          |     |    |                    |                                |                                                                                        |                           |
| 18                    | 14005289  | 14005595  | 307 | 1827  | No               | Yes      | Yes | No | ENSMUSG00000024420 | --- // Zfp521                  | NA // zinc finger protein 521                                                          | downstream mmu-mir-1948   |
| 7                     | 127095816 | 127096230 | 415 | 3643  | No               | Yes      | Yes | No | ENSMUSG00000052273 | Dnahc3                         | dynein, axonemal, heavy chain 3                                                        | upstream mmu-mir-762      |
| 9                     | 86467526  | 86467705  | 180 | 4062  | No               | Yes      | Yes | No | ENSMUSG00000032417 | Rwdd2a                         | RWD domain containing 2A                                                               | downstream mmu-mir-184    |
| ENSMUSG00000079997 // |           |           |     |       |                  |          |     |    |                    |                                |                                                                                        |                           |
| 14                    | 119284098 | 119284438 | 341 | 1302  | No               | Yes      | Yes | No | ENSMUSG00000042156 | --- // Dzip1                   | NA // DAZ interacting protein 1                                                        | downstream mmu-mir-92a-1  |
| 10                    | 116271669 | 116271994 | 326 | 427   | No               | Yes      | Yes | No | ENSMUSG00000034057 | Gm239                          | predicted gene 239                                                                     | downstream mmu-mir-763    |
| 18                    | 70691261  | 70691534  | 274 | 1927  | No               | Yes      | Yes | No | ENSMUSG00000038425 | Poli                           | polymerase (DNA directed), iota                                                        | upstream mmu-mir-694      |
| 15                    | 97551697  | 97552038  | 342 | 1481  | No               | Yes      | Yes | No | ENSMUSG00000022468 | Endou                          | endonuclease, polyU-specific                                                           | upstream mmu-mir-1941     |
| 7                     | 50221679  | 50222144  | 466 | 3530  | No               | Yes      | Yes | No | ENSMUSG00000076190 |                                |                                                                                        | upstream mmu-mir-707      |
| 9                     | 61792905  | 61793223  | 319 | 4020  | No               | Yes      | Yes | No | ENSMUSG00000032254 | Kif23                          | kinesin family member 23                                                               | downstream mmu-mir-5133   |
| ENSMUSG00000021041 // |           |           |     |       |                  |          |     |    |                    |                                |                                                                                        |                           |
| 12                    | 88790172  | 88790412  | 241 | 871   | No               | Yes      | Yes | No | ENSMUSG00000021040 | 2700073G19Rik // 1810035L17Rik | RIKEN cDNA 2700073G19 gene // RIKEN cDNA 1810035L17 gene                               | upstream mmu-mir-3068     |
| ENSMUSG00000040121 // |           |           |     |       |                  |          |     |    |                    |                                |                                                                                        |                           |
| 6                     | 146975736 | 146976490 | 755 | 3465  | No               | Yes      | Yes | No | ENSMUSG00000016487 | Rep15 // Ppfbp1                | RAB15 effector protein // PTPRF interacting protein, binding protein 1 (liprin beta 1) | downstream mmu-mir-680-1  |
| 13                    | 38127687  | 38128016  | 330 | 957   | No               | Yes      | Yes | No | ENSMUSG00000044566 | Cage1                          | cancer antigen 1                                                                       | upstream mmu-mir-5124     |
| 13                    | 64052638  | 64053017  | 380 | 1030  | No               | Yes      | Yes | No | ENSMUSG00000021470 | 0610007P08Rik                  | RIKEN cDNA 0610007P08 gene                                                             | upstream mmu-mir-3074-1   |
| 14                    | 55840766  | 55841028  | 263 | 1212  | No               | Yes      | Yes | No | ENSMUSG00000022209 | Dhrs2                          | dehydrogenase/reductase member 2                                                       | upstream mmu-mir-208b     |
| 7                     | 144000575 | 144000977 | 403 | 3691  | No               | Yes      | Yes | No | ENSMUSG00000054612 | Mgmt                           | O-6-methylguanine-DNA methyltransferase                                                | downstream mmu-mir-1962   |
| 6                     | 108095158 | 108095361 | 204 | 3383  | No               | Yes      | Yes | No | ENSMUSG00000030101 | Sumf1                          | sulfatase modifying factor 1                                                           | downstream mmu-mir-706    |
| ENSMUSG00000026727 // |           |           |     |       |                  |          |     |    |                    |                                |                                                                                        |                           |
| 2                     | 13198165  | 13198478  | 314 | 2141  | No               | Yes      | Yes | No | ENSMUSG00000026726 | Rsu1 // Cubn                   | Ras suppressor protein 1 // cubilin (intrinsic factor-cobalamin receptor)              | upstream mmu-mir-511      |
| 16                    | 92293942  | 92294259  | 318 | 1636  | No               | Yes      | Yes | No | ENSMUSG00000039672 | Kcne2                          | potassium voltage-gated channel, Isk-related subfamily, gene 2                         | upstream mmu-mir-802      |
| 6                     | 90552774  | 90553063  | 290 | 3360  | No               | Yes      | Yes | No | ENSMUSG00000030089 | Slc41a3                        | solute carrier family 41, member 3                                                     | upstream mmu-mir-705      |
| 10                    | 86979898  | 86980143  | 246 | 380   | No               | Yes      | Yes | No | ENSMUSG00000020051 | Pah                            | phenylalanine hydroxylase                                                              | downstream mmu-mir-135a-2 |
| 16                    | 89571497  | 89571735  | 239 | 1625  | No               | Yes      | Yes | No | ENSMUSG00000056706 | Krtap7-1                       | keratin associated protein 7-1                                                         | upstream mmu-mir-802      |
| 17                    | 34081730  | 34082180  | 451 | 1704  | No               | Yes      | Yes | No | ENSMUSG00000024312 | Wdr46                          | WD repeat domain 46                                                                    | downstream mmu-mir-219-1  |
| 18                    | 61013037  | 61013345  | 309 | 1896  | No               | Yes      | Yes | No | ENSMUSG00000024613 | Tcof1                          | Treacher Collins Franceschetti syndrome 1, homolog                                     | downstream mmu-mir-5107   |
| ENSMUSG00000081142 // |           |           |     |       |                  |          |     |    |                    |                                |                                                                                        |                           |
| 5                     | 139051120 | 139051683 | 564 | 3202  | No               | Yes      | Yes | No | ENSMUSG00000058291 | Gm15497 // Zfp68               | predicted gene 15497 // zinc finger protein 68                                         | upstream mmu-mir-106b     |
| 9                     | 119473815 | 119474058 | 244 | 4141  | No               | Yes      | Yes | No | ENSMUSG00000032511 | Scn5a                          | sodium channel, voltage-gated, type V, alpha                                           | downstream mmu-mir-26a-1  |
| 17                    | 29659666  | 29660149  | 484 | 1689  | No               | Yes      | Yes | No | ENSMUSG00000079580 | Tmem217                        | transmembrane protein 217                                                              | upstream mmu-mir-3083     |
| ENSMUSG00000026154 // |           |           |     |       |                  |          |     |    |                    |                                |                                                                                        |                           |
| 1                     | 24034551  | 24034832  | 282 | 16    | No               | Yes      | Yes | No | ENSMUSG00000026153 | 1110058L19Rik // Fam135a       | RIKEN cDNA 1110058L19 gene // family with sequence similarity 135, member A            | downstream mmu-mir-30c-2  |
| 2                     | 170110150 | 170110601 | 452 | 2404  | No               | Yes      | Yes | No | ENSMUSG00000084013 | Gm14270                        | predicted gene 14270                                                                   | downstream mmu-mir-296    |
| 9                     | 55128373  | 55128741  | 369 | 4006  | No               | Yes      | Yes | No | ENSMUSG00000032311 | Nrg4                           | neuregulin 4                                                                           | downstream mmu-mir-5710   |



| reg. ID               | Chr.      | start     | end | width | Enrichment meDNA |     |          |    | ENSEMBL ID         | symbol            | gene name                                                                                                          | next miRNA               |
|-----------------------|-----------|-----------|-----|-------|------------------|-----|----------|----|--------------------|-------------------|--------------------------------------------------------------------------------------------------------------------|--------------------------|
|                       |           |           |     |       | 5-Htt+/+         | PS  | 5-Htt+/- | PS |                    |                   |                                                                                                                    |                          |
| 17                    | 32304227  | 32304848  | 622 | 1698  | No               | Yes | Yes      | No | ENSMUSG00000038146 | Notch3            | Notch gene homolog 3 (Drosophila)                                                                                  | downstream mmu-mir-219-1 |
| 15                    | 7088102   | 7088398   | 297 | 1320  | No               | Yes | Yes      | No | ENSMUSG00000058898 | ---               | NA                                                                                                                 | upstream mmu-mir-1898    |
| 13                    | 56581605  | 56581947  | 343 | 1014  | No               | Yes | Yes      | No | ENSMUSG00000021538 | Il9               | interleukin 9                                                                                                      | downstream mmu-mir-874   |
| ENSMUSG00000069805 // |           |           |     |       |                  |     |          |    |                    |                   |                                                                                                                    |                          |
| 13                    | 62987190  | 62987786  | 597 | 1028  | No               | Yes | Yes      | No | ENSMUSG00000056199 | Fbp1 // ---       | fructose bisphosphatase 1 // NA                                                                                    | downstream mmu-mir-713   |
| 14                    | 33670782  | 33671491  | 710 | 1162  | No               | Yes | Yes      | No | ENSMUSG00000050666 | E130203B14Rik     | RIKEN cDNA E130203B14 gene                                                                                         | upstream mmu-mir-346     |
| 10                    | 41775512  | 41775792  | 281 | 308   | No               | Yes | Yes      | No | ENSMUSG00000051559 | ---               | NA                                                                                                                 | downstream mmu-mir-3473b |
| 13                    | 38140859  | 38141140  | 282 | 958   | No               | Yes | Yes      | No | ENSMUSG00000021428 | Riok1             | RIO kinase 1 (yeast)                                                                                               | upstream mmu-mir-5124    |
| 18                    | 77189798  | 77190071  | 274 | 1934  | No               | Yes | Yes      | No | ENSMUSG00000025421 | Hdhd2             | haloacid dehalogenase-like hydrolase domain containing 2                                                           | downstream mmu-mir-5127  |
| 17                    | 85145116  | 85145421  | 306 | 1806  | No               | Yes | Yes      | No | ENSMUSG00000024120 | Lrpprc            | leucine-rich PPR-motif containing                                                                                  | upstream mmu-mir-1195    |
| ENSMUSG00000077556 // |           |           |     |       |                  |     |          |    |                    |                   |                                                                                                                    |                          |
| 6                     | 73037138  | 73037377  | 240 | 3323  | No               | Yes | Yes      | No | ENSMUSG00000052861 | --- // Dnahc6     | NA // dynein, axonemal, heavy chain 6                                                                              | downstream mmu-mir-468   |
| ENSMUSG00000084126 // |           |           |     |       |                  |     |          |    |                    |                   |                                                                                                                    |                          |
| 5                     | 103977519 | 103977875 | 357 | 3096  | No               | Yes | Yes      | No | ENSMUSG00000034573 | Gm15844 // Ptpn13 | predicted gene 15844 // protein tyrosine phosphatase, Non-receptor type 13                                         | upstream mmu-mir-5619    |
| 1                     | 88984850  | 88985091  | 242 | 77    | No               | Yes | Yes      | No | ENSMUSG00000026246 | Alpl2             | alkaline phosphatase, placental-like 2                                                                             | downstream mmu-mir-5126  |
| ENSMUSG00000077526 // |           |           |     |       |                  |     |          |    |                    |                   |                                                                                                                    |                          |
| 8                     | 60024215  | 60024508  | 294 | 3809  | No               | Yes | Yes      | No | ENSMUSG00000031608 | // Galnt7         | Small nucleolar RNA SNoRA65 // UDP-N-acetyl-alpha-D-galactosamine: polypeptide N-acetylgalactosaminyltransferase 7 | downstream mmu-mir-710   |
| 15                    | 78691565  | 78691842  | 278 | 1400  | No               | Yes | Yes      | No | ENSMUSG00000043501 | Lgals2            | lectin, galactose-binding, soluble 2                                                                               | downstream mmu-mir-1943  |
| 8                     | 111234049 | 111234594 | 546 | 3872  | No               | Yes | Yes      | No | ENSMUSG00000038872 | Zfhx3             | zinc finger homeobox 3                                                                                             | upstream mmu-mir-3108    |
| 17                    | 71372063  | 71372269  | 207 | 1770  | No               | Yes | Yes      | No | ENSMUSG00000024049 | Myom1             | myomesin 1                                                                                                         | upstream mmu-mir-1195    |
| 15                    | 101325243 | 101325528 | 286 | 1515  | No               | Yes | Yes      | No | ENSMUSG00000067613 | 5430421N21Rik     | RIKEN cDNA 5430421N21 gene                                                                                         | downstream mmu-mir-1941  |
| 15                    | 97838792  | 97839029  | 238 | 1484  | No               | Yes | Yes      | No | ENSMUSG00000022483 | Col2a1            | collagen, type II, alpha 1                                                                                         | upstream mmu-mir-1941    |
| 9                     | 110702212 | 110702842 | 631 | 4111  | No               | Yes | Yes      | No | ENSMUSG00000044664 | Prss42            | protease, serine, 42                                                                                               | downstream mmu-mir-128-2 |
| 8                     | 111237514 | 111237759 | 246 | 3874  | No               | Yes | Yes      | No | ENSMUSG00000038872 | Zfhx3             | zinc finger homeobox 3                                                                                             | upstream mmu-mir-3108    |
| 3                     | 148482292 | 148482575 | 284 | 2673  | No               | Yes | Yes      | No | ENSMUSG00000028184 | Lphn2             | latrophilin 2                                                                                                      | downstream mmu-mir-3963  |
| 7                     | 112485391 | 112485820 | 430 | 3620  | No               | Yes | Yes      | No | ENSMUSG00000043948 | Olf691            | olfactory receptor 691                                                                                             | downstream mmu-mir-139   |
| ENSMUSG00000084218 // |           |           |     |       |                  |     |          |    |                    |                   |                                                                                                                    |                          |
| 5                     | 107693517 | 107693904 | 388 | 3112  | No               | Yes | Yes      | No | ENSMUSG00000029287 | Gm8145 // Tgfbr3  | predicted gene 8145 // transforming growth factor, beta receptor III                                               | downstream mmu-mir-5619  |
| 10                    | 118292685 | 118293005 | 321 | 440   | No               | Yes | Yes      | No | ENSMUSG00000050709 | 4932442E05Rik     | RIKEN cDNA 4932442E05 gene                                                                                         | downstream mmu-mir-763   |
| 19                    | 5336127   | 5336455   | 329 | 1963  | No               | Yes | Yes      | No | ENSMUSG00000038498 | Catsper1          | cation channel, sperm associated 1                                                                                 | upstream mmu-mir-194-2   |
| 8                     | 32219619  | 32220083  | 465 | 3768  | No               | Yes | Yes      | No | ENSMUSG00000039328 | Rnf122            | ring finger protein 122                                                                                            | upstream mmu-mir-1186    |
| 4                     | 150371476 | 150371698 | 223 | 2938  | No               | Yes | Yes      | No | ENSMUSG00000028963 | Uts2              | urotensin 2                                                                                                        | downstream mmu-mir-34a   |
| 8                     | 118235621 | 118236032 | 412 | 3892  | No               | Yes | Yes      | No | ENSMUSG00000055435 | Maf               | avian musculoaponeurotic fibrosarcoma (v-maf) AS42 oncogene homolog                                                | upstream mmu-mir-3473d   |
| 13                    | 47102005  | 47102256  | 252 | 979   | No               | Yes | Yes      | No | ENSMUSG00000051606 | 2010001K21Rik     | RIKEN cDNA 2010001K21 gene                                                                                         | downstream mmu-let-7d    |
| 2                     | 13410986  | 13411223  | 238 | 2142  | No               | Yes | Yes      | No | ENSMUSG00000026726 | Cubn              | cubilin (intrinsic factor-cobalamin receptor)                                                                      | upstream mmu-mir-511     |
| ENSMUSG00000027655 // |           |           |     |       |                  |     |          |    |                    |                   |                                                                                                                    |                          |
| 2                     | 158610130 | 158610326 | 197 | 2360  | No               | Yes | Yes      | No | ENSMUSG00000027654 | Dhx35 // Fam83d   | DEAH (Asp-Glu-Ala-His) box polypeptide 35 // family with sequence similarity 83, member D                          | downstream mmu-mir-3474  |
| 19                    | 28756535  | 28756817  | 283 | 2009  | No               | Yes | Yes      | No | ENSMUSG00000052942 | Glis3             | GLIS family zinc finger 3                                                                                          | upstream mmu-mir-101b    |
| 1                     | 187280556 | 187280819 | 264 | 222   | No               | Yes | Yes      | No | ENSMUSG00000026614 | Slc30a10          | solute carrier family 30, member 10                                                                                | downstream mmu-mir-215   |
| 7                     | 107090832 | 107091162 | 331 | 3595  | No               | Yes | Yes      | No | ENSMUSG00000058761 | Rnf169            | ring finger protein 169                                                                                            | downstream mmu-mir-326   |

| reg. ID | Chr.      | start     | end | width | Enrichment meDNA |     |          |     | ENSEMBL ID                                  | symbol           | gene name                                                                                                 | next miRNA                |
|---------|-----------|-----------|-----|-------|------------------|-----|----------|-----|---------------------------------------------|------------------|-----------------------------------------------------------------------------------------------------------|---------------------------|
|         |           |           |     |       | 5-Htt+/+         | PS  | 5-Htt+/- | PS  |                                             |                  |                                                                                                           |                           |
| 12      | 25270733  | 25271043  | 311 | 793   | No               | Yes | Yes      | No  | ENSMUSG00000020656                          | Grh1             | grainyhead-like 1 (Drosophila)                                                                            | downstream mmu-mir-3066   |
| 2       | 181321734 | 181322397 | 664 | 2434  | No               | Yes | Yes      | No  | ENSMUSG00000000823                          | Znf512b          | zinc finger protein 512B                                                                                  | downstream mmu-mir-124-3  |
| 16      | 22443504  | 22444077  | 574 | 1543  | No               | Yes | Yes      | No  | ENSMUSG00000013089                          | Etv5             | ets variant gene 5                                                                                        | downstream mmu-mir-1224   |
| 19      | 7064270   | 7064466   | 197 | 1969  | No               | Yes | Yes      | No  | ENSMUSG00000024962 //<br>ENSMUSG00000024963 | Vegfb // Dnajc4  | vascular endothelial growth factor B // DnaJ (Hsp40) homolog, subfamily C, member 4                       | upstream mmu-mir-5046     |
| 11      | 42964973  | 42965240  | 268 | 523   | No               | Yes | Yes      | No  | ENSMUSG00000055415                          | Atp10b           | ATPase, class V, type 10B                                                                                 | downstream mmu-mir-146a   |
| 10      | 88896503  | 88896707  | 205 | 387   | No               | Yes | Yes      | No  | ENSMUSG00000074802                          | Gas2l3           | growth arrest-specific 2 like 3                                                                           | downstream mmu-mir-135a-2 |
| 6       | 126966774 | 126967045 | 272 | 3423  | No               | Yes | Yes      | No  | ENSMUSG00000000183                          | Fgf6             | fibroblast growth factor 6                                                                                | downstream mmu-mir-3098   |
| 17      | 80747899  | 80748257  | 359 | 1798  | No               | Yes | Yes      | No  | ENSMUSG00000054901                          | Arhgef33         | Rho guanine nucleotide exchange factor (GEF) 33                                                           | upstream mmu-mir-1195     |
| 8       | 28128311  | 28128476  | 166 | 3759  | No               | Yes | Yes      | No  | ENSMUSG00000031483                          | Erlin2           | ER lipid raft associated 2                                                                                | upstream mmu-mir-3107     |
| 15      | 77791885  | 77792158  | 274 | 1395  | No               | Yes | Yes      | No  | ENSMUSG00000016552 //<br>ENSMUSG00000016554 | Foxred2 // Eif3d | FAD-dependent oxidoreductase domain containing 2 // eukaryotic translation initiation factor 3, subunit D | downstream mmu-mir-1943   |
| 13      | 12520880  | 12521218  | 339 | 935   | No               | Yes | Yes      | No  | ENSMUSG00000050244                          | Lgals8 // Heatr1 | lectin, galactose binding, soluble 8 // HEAT repeat containing 1                                          | upstream mmu-mir-466i     |
| 11      | 59473695  | 59473903  | 209 | 574   | Yes              | No  | No       | Yes | ENSMUSG00000005417                          | Mprip            | myosin phosphatase Rho interacting protein                                                                | upstream mmu-mir-5100     |
| 18      | 82693616  | 82694069  | 454 | 1947  | Yes              | No  | No       | Yes | ENSMUSG00000061684 //<br>ENSMUSG00000041607 | Rpl21-ps8 // Mbp | ribosomal protein L21, pseudogene 8 // myelin basic protein                                               | upstream mmu-mir-5112     |
| 8       | 46036650  | 46037620  | 971 | 3795  | Yes              | No  | No       | Yes | ENSMUSG00000070047                          | Fat1             | FAT tumor suppressor homolog 1 (Drosophila)                                                               | upstream mmu-mir-383      |
| 19      | 55811026  | 55811155  | 130 | 2097  | Yes              | No  | No       | Yes | ENSMUSG00000024985                          | Tcf7l2           | transcription factor 7 like 2, T cell specific, HMG box                                                   | upstream mmu-mir-5623     |
| 3       | 138792237 | 138792755 | 519 | 2649  | Yes              | No  | No       | Yes | ENSMUSG00000028149                          | Rap1gds1         | RAP1, GTP-GDP dissociation stimulator 1                                                                   | downstream mmu-mir-1956   |
| 11      | 116218086 | 116218410 | 325 | 749   | Yes              | No  | No       | Yes | ENSMUSG00000034227 //<br>ENSMUSG00000052949 | Foxj1 // Rnf157  | forkhead box J1 // ring finger protein 157                                                                | downstream mmu-mir-5621   |
| 4       | 155245936 | 155246284 | 349 | 2952  | Yes              | No  | No       | Yes | ENSMUSG00000029034                          | Cpsf3l           | cleavage and polyadenylation specific factor 3-like                                                       | downstream mmu-mir-429    |
| 13      | 99955164  | 99955629  | 466 | 1083  | Yes              | No  | No       | Yes | ENSMUSG00000050919                          | Zfp366           | zinc finger protein 366                                                                                   | downstream mmu-mir-1940   |
| 1       | 155697375 | 155697648 | 274 | 155   | Yes              | No  | No       | Yes | ENSMUSG00000045968                          | 5830403L16Rik    | RIKEN cDNA 5830403L16 gene                                                                                | upstream mmu-mir-488      |
| 5       | 118691324 | 118691530 | 207 | 3160  | Yes              | No  | No       | Yes | ENSMUSG00000032850                          | Rnft2            | ring finger protein, transmembrane 2                                                                      | downstream mmu-mir-701    |
| 1       | 157130267 | 157130619 | 353 | 157   | Yes              | No  | No       | Yes | ENSMUSG00000033722 //<br>ENSMUSG00000026469 | BC034090 // Xpr1 | cDNA sequence BC034090 // xenotropic and polytropic retrovirus receptor 1                                 | upstream mmu-mir-488      |
| 1       | 174058428 | 174058676 | 249 | 197   | Yes              | No  | No       | Yes | ENSMUSG00000003464                          | Pex19            | peroxisomal biogenesis factor 19                                                                          | downstream mmu-mir-350    |
| 11      | 50187982  | 50188294  | 313 | 548   | Yes              | No  | No       | Yes | ENSMUSG00000007850                          | Hnrnp1           | heterogeneous nuclear ribonucleoprotein H1                                                                | upstream mmu-mir-804      |
| 1       | 122019584 | 122019852 | 269 | 104   | Yes              | No  | No       | Yes | ENSMUSG00000026388                          | 3110009E18Rik    | RIKEN cDNA 3110009E18 gene                                                                                | upstream mmu-mir-128-1    |
| 1       | 64190793  | 64190970  | 178 | 59    | Yes              | No  | No       | Yes | ENSMUSG00000057599                          | ---              | NA                                                                                                        | downstream mmu-mir-1928   |
| 9       | 72022276  | 72022772  | 497 | 4039  | Yes              | No  | No       | Yes | ENSMUSG00000058777                          | ---              | NA                                                                                                        | upstream mmu-mir-5626     |
| 2       | 165475635 | 165476296 | 662 | 2384  | Yes              | No  | No       | Yes | ENSMUSG00000081758 //<br>ENSMUSG00000017897 | Gm11460 // Eya2  | predicted gene 11460 // eYes absent 2 homolog (Drosophila)                                                | downstream mmu-mir-3474   |
| 16      | 92467901  | 92468639  | 739 | 1640  | Yes              | No  | No       | Yes | ENSMUSG00000022951                          | Rcan1            | regulator of calcineurin 1                                                                                | upstream mmu-mir-802      |
| 2       | 76555309  | 76555697  | 389 | 2230  | Yes              | No  | No       | Yes | ENSMUSG00000002733 //<br>ENSMUSG00000051747 | Plekha3 // Ttn   | pleckstrin homology domain-containing, family A (phosphoinositide binding specific) member 3 // titin     | downstream mmu-mir-10b    |

| reg. ID | Chr.      | start     | end | width | Enrichment meDNA |          |    |     | ENSEMBL ID            | symbol                                                           | gene name                                                                | next miRNA              |
|---------|-----------|-----------|-----|-------|------------------|----------|----|-----|-----------------------|------------------------------------------------------------------|--------------------------------------------------------------------------|-------------------------|
|         |           |           |     |       | 5-Htt+/+         | 5-Htt+/- | C  | PS  |                       |                                                                  |                                                                          |                         |
|         |           |           |     |       |                  |          |    |     | ENSMUSG00000078588 // | coiled-coil domain containing 24 // UDP-Gal:betaGlcNAc beta 1,4- |                                                                          |                         |
| 4       | 117551930 | 117552343 | 414 | 2837  | Yes              | No       | No | Yes | ENSMUSG00000028541    | Ccdc24 // B4galt2                                                | galactosyltransferase, polypeptide 2                                     | upstream mmu-mir-1957   |
| 16      | 48072535  | 48072881  | 347 | 1587  | Yes              | No       | No | Yes | ENSMUSG00000078093    | ---                                                              | NA                                                                       | upstream mmu-mir-3081   |
| 10      | 67604628  | 67604930  | 303 | 340   | Yes              | No       | No | Yes | ENSMUSG00000019947    | Arid5b                                                           | AT rich interactive domain 5B (MRF1-like)                                | downstream mmu-mir-5108 |
|         |           |           |     |       |                  |          |    |     | ENSMUSG00000078607 // | 1810010H24Rik //                                                 | RIKEN cDNA 1810010H24 gene // bromodomain PHD finger transcription       |                         |
| 11      | 106932907 | 106933441 | 535 | 725   | Yes              | No       | No | Yes | ENSMUSG00000040481    | Bptf                                                             | factor                                                                   | upstream mmu-mir-3064   |
| 7       | 108721935 | 108722423 | 489 | 3599  | Yes              | No       | No | Yes | ENSMUSG00000030651    | Art2b                                                            | ADP-ribosyltransferase 2b                                                | downstream mmu-mir-139  |
| 6       | 86632793  | 86633003  | 211 | 3339  | Yes              | No       | No | Yes | ENSMUSG00000001158    | Snrnp27                                                          | small nuclear ribonucleoprotein 27 (U4/U6.U5)                            | upstream mmu-mir-705    |
| 8       | 107117522 | 107118207 | 686 | 3857  | Yes              | No       | No | Yes | ENSMUSG00000048371    | Pdp2                                                             | pyruvate dehydrogenase phosphatase catalytic subunit 2                   | downstream mmu-mir-328  |
| 5       | 107862010 | 107862425 | 416 | 3114  | Yes              | No       | No | Yes | ENSMUSG00000033794    | Lpcat2b                                                          | lysophosphatidylcholine acyltransferase 2B                               | downstream mmu-mir-5619 |
| 10      | 116410305 | 116410549 | 245 | 432   | Yes              | No       | No | Yes | ENSMUSG00000069518    | Gm10271                                                          | predicted gene 10271                                                     | downstream mmu-mir-763  |
| 6       | 55961773  | 55961974  | 202 | 3310  | Yes              | No       | No | Yes | ENSMUSG00000002930    | Ppp1r17                                                          | protein phosphatase 1, regulatory subunit 17                             | upstream mmu-mir-196b   |
| 7       | 69525724  | 69526023  | 300 | 3559  | Yes              | No       | No | Yes | ENSMUSG00000056972    | Magel2                                                           | melaNoma antigen, family L, 2                                            | upstream mmu-mir-344i   |
| 5       | 4759623   | 4759898   | 276 | 2956  | Yes              | No       | No | Yes | ENSMUSG00000044674    | Fzd1                                                             | frizzled homolog 1 (Drosophila)                                          | upstream mmu-mir-879    |
| 4       | 40642156  | 40642472  | 317 | 2734  | Yes              | No       | No | Yes | ENSMUSG00000028411    | Aptx                                                             | aprataxin                                                                | upstream mmu-mir-207    |
| 19      | 56470019  | 56470215  | 197 | 2101  | Yes              | No       | No | Yes | ENSMUSG00000025076    | Casp7                                                            | caspase 7                                                                | upstream mmu-mir-5623   |
| 7       | 143849226 | 143849653 | 428 | 3689  | Yes              | No       | No | Yes | ENSMUSG00000054612    | Mgmt                                                             | O-6-methylguanine-DNA methyltransferase                                  | downstream mmu-mir-1962 |
| 9       | 77899102  | 77899339  | 238 | 4054  | Yes              | No       | No | Yes | ENSMUSG00000023333    | Gcm1                                                             | glial cells missing homolog 1 (Drosophila)                               | upstream mmu-mir-5626   |
|         |           |           |     |       |                  |          |    |     | ENSMUSG00000065771 // |                                                                  |                                                                          |                         |
| 13      | 53063137  | 53063349  | 213 | 999   | Yes              | No       | No | Yes | ENSMUSG00000056749    | n-R5s54 // Nfil3                                                 | nuclear encoded rRNA 5S 54 // nuclear factor, interleukin 3, regulated   | upstream mmu-mir-683-2  |
| 4       | 136445450 | 136445652 | 203 | 2892  | Yes              | No       | No | Yes | ENSMUSG00000036896    | C1qc                                                             | complement component 1, q subcomponent, C chain                          | upstream mmu-mir-700    |
| 13      | 100290146 | 100290309 | 164 | 1085  | Yes              | No       | No | Yes | ENSMUSG00000052727    | Mtap1b                                                           | microtubule-associated protein 1B                                        | downstream mmu-mir-1940 |
| 14      | 33599914  | 33600496  | 583 | 1160  | Yes              | No       | No | Yes | ENSMUSG00000041707    | 1810011H11Rik                                                    | RIKEN cDNA 1810011H11 gene                                               | upstream mmu-mir-346    |
|         |           |           |     |       |                  |          |    |     | ENSMUSG00000074285 // |                                                                  |                                                                          |                         |
| 8       | 70220885  | 70221160  | 276 | 3815  | Yes              | No       | No | Yes | ENSMUSG00000030465    | --- // Psd3                                                      | NA // pleckstrin and Sec7 domain containing 3                            | upstream mmu-mir-710    |
| 5       | 145939323 | 145939579 | 257 | 3219  | Yes              | No       | No | Yes | ENSMUSG00000029625    | Cpsf4                                                            | cleavage and polyadenylation specific factor 4                           | upstream mmu-mir-5105   |
|         |           |           |     |       |                  |          |    |     | ENSMUSG00000002588 // |                                                                  | paraoxonase 1 // protein phosphatase 1, regulatory (inhibitor) subunit   |                         |
| 6       | 5061769   | 5062105   | 337 | 3244  | Yes              | No       | No | Yes | ENSMUSG00000032827    | Pon1 // Ppp1r9a                                                  | 9A                                                                       | upstream mmu-mir-489    |
| 9       | 29772324  | 29772529  | 206 | 3957  | Yes              | No       | No | Yes | ENSMUSG00000059974    | Ntm                                                              | neurotrimin                                                              | upstream mmu-mir-1946b  |
| 16      | 88612382  | 88612658  | 277 | 1619  | Yes              | No       | No | Yes | ENSMUSG00000050239    | Krtap24-1                                                        | keratin associated protein 24-1                                          | downstream mmu-mir-155  |
| 3       | 96958913  | 96959113  | 201 | 2565  | Yes              | No       | No | Yes | ENSMUSG00000028093    | Acp6                                                             | acid phosphatase 6, lysophosphatidic                                     | downstream mmu-mir-190b |
| 16      | 88562474  | 88562782  | 309 | 1618  | Yes              | No       | No | Yes | ENSMUSG00000050520    | Cldn8                                                            | claudin 8                                                                | downstream mmu-mir-155  |
|         |           |           |     |       |                  |          |    |     | ENSMUSG00000043964 // |                                                                  | ORAI calcium release-activated calcium modulator 3 // F-box and leucine- |                         |
| 7       | 134907704 | 134907966 | 263 | 3664  | Yes              | No       | No | Yes | ENSMUSG00000030811    | Orai3 // Fbxl19                                                  | rich repeat protein 19                                                   | downstream mmu-mir-762  |
| 9       | 67799114  | 67799383  | 270 | 4031  | Yes              | No       | No | Yes | ENSMUSG00000035284    | Vps13c                                                           | vacuolar protein sorting 13C (yeast)                                     | upstream mmu-mir-190    |
| 3       | 87180840  | 87181224  | 385 | 2540  | Yes              | No       | No | Yes | ENSMUSG00000059994    | Fcrl1                                                            | Fc receptor-like 1                                                       | upstream mmu-mir-3093   |
| 6       | 122594236 | 122594653 | 418 | 3406  | Yes              | No       | No | Yes | ENSMUSG00000046323    | Dppa3                                                            | developmental pluripotency-associated 3                                  | downstream mmu-mir-141  |
| 13      | 12265549  | 12265974  | 426 | 930   | Yes              | No       | No | Yes | ENSMUSG00000071543    | ---                                                              | NA                                                                       | upstream mmu-mir-466i   |
| 15      | 100498067 | 100498413 | 347 | 1508  | Yes              | No       | No | Yes | ENSMUSG00000075411    | ---                                                              | NA                                                                       | upstream mmu-mir-1941   |
| 2       | 29747152  | 29747467  | 316 | 2161  | Yes              | No       | No | Yes | ENSMUSG00000026790    | Odf2                                                             | outer dense fiber of sperm tails 2                                       | upstream mmu-mir-219-2  |
| 3       | 54436844  | 54437123  | 280 | 2489  | Yes              | No       | No | Yes | ENSMUSG00000027751    | Fam48a                                                           | family with sequence similarity 48, member A                             | upstream mmu-mir-15b    |

| reg. ID | Chr.      | start     | end | width | Enrichment meDNA |    |    |     | ENSEMBL ID                                  | symbol                   | gene name                                                                                                      | next miRNA                |
|---------|-----------|-----------|-----|-------|------------------|----|----|-----|---------------------------------------------|--------------------------|----------------------------------------------------------------------------------------------------------------|---------------------------|
|         |           |           |     |       | 5-Htt+/+         | PS | C  | PS  |                                             |                          |                                                                                                                |                           |
| 9       | 42212056  | 42212330  | 275 | 3987  | Yes              | No | No | Yes | ENSMUSG00000037705                          | Tecta                    | tectorin alpha                                                                                                 | downstream mmu-mir-125b-1 |
| 17      | 24171843  | 24172081  | 239 | 1676  | Yes              | No | No | Yes | ENSMUSG00000050762                          | Prss27                   | protease, serine, 27                                                                                           | downstream mmu-mir-5134   |
| 17      | 87359293  | 87359731  | 439 | 1811  | Yes              | No | No | Yes | ENSMUSG00000024143                          | Rhoq                     | ras homolog gene family, member Q                                                                              | upstream mmu-mir-1195     |
| 2       | 126374638 | 126374954 | 317 | 2303  | Yes              | No | No | Yes | ENSMUSG00000027359                          | Slc27a2                  | solute carrier family 27 (fatty acid transporter), member 2                                                    | downstream mmu-mir-147    |
| 6       | 136886442 | 136886658 | 217 | 3440  | Yes              | No | No | Yes | ENSMUSG00000030220                          | Arhgdib                  | Rho, GDP dissociation inhibitor (GDI) beta                                                                     | downstream mmu-mir-680-1  |
| 17      | 29656335  | 29656796  | 462 | 1688  | Yes              | No | No | Yes | ENSMUSG00000024014                          | Pim1                     | proviral integration site 1                                                                                    | upstream mmu-mir-3083     |
| 19      | 34326627  | 34327071  | 445 | 2023  | Yes              | No | No | Yes | ENSMUSG00000035783                          | Acta2                    | actin, alpha 2, smooth muscle, aorta                                                                           | downstream mmu-mir-107    |
| 17      | 45670186  | 45670390  | 205 | 1733  | Yes              | No | No | Yes | ENSMUSG00000023949                          | Tcte1                    | t-complex-associated testis expressed 1                                                                        | upstream mmu-mir-693      |
| 7       | 30315563  | 30316083  | 521 | 3508  | Yes              | No | No | Yes | ENSMUSG00000074224                          | 4932431P20Rik            | RIKEN cDNA 4932431P20 gene                                                                                     | upstream mmu-mir-1964     |
| 13      | 22074876  | 22075224  | 349 | 941   | Yes              | No | No | Yes | ENSMUSG00000016982                          | Pom121l2                 | POM121 membrane glycoprotein-like 2 (rat)                                                                      | upstream mmu-mir-1983     |
| 8       | 13055218  | 13055381  | 164 | 3730  | Yes              | No | No | Yes | ENSMUSG00000031445 //<br>ENSMUSG00000031444 | Proz // F10              | protein Z, vitamin K-dependent plasma glycoprotein // coagulation factor X                                     | downstream mmu-mir-1968   |
| 10      | 98590819  | 98591055  | 237 | 408   | Yes              | No | No | Yes | ENSMUSG00000055108 //<br>ENSMUSG00000019952 | Phxr2 // Poc1b           | per-hexamer repeat gene 2 // POC1 centriolar protein homolog B (Chlamydomonas)                                 | downstream mmu-mir-3966   |
| 16      | 35858088  | 35858439  | 352 | 1567  | Yes              | No | No | Yes | ENSMUSG00000034422                          | Parp14                   | poly (ADP-ribose) polymerase family, member 14                                                                 | downstream mmu-mir-1947   |
| 15      | 73436045  | 73436479  | 435 | 1382  | Yes              | No | No | Yes | ENSMUSG00000036649 //<br>ENSMUSG00000079020 | --- // Slc45a4           | NA // solute carrier family 45, member 4                                                                       | upstream mmu-mir-151      |
| 6       | 137697901 | 137698137 | 237 | 3443  | Yes              | No | No | Yes | ENSMUSG00000030225 //<br>ENSMUSG00000030224 | Dera // Strap            | 2-deoxyribose-5-phosphate aldolase homolog (C. elegans) // serine/threonine kinase receptor associated protein | downstream mmu-mir-680-1  |
| 2       | 4574712   | 4574910   | 199 | 2124  | Yes              | No | No | Yes | ENSMUSG00000039449                          | Prpf18                   | PRP18 pre-mRNA processing factor 18 homolog (yeast)                                                            | upstream mmu-mir-466m     |
| 15      | 7346643   | 7346911   | 269 | 1321  | Yes              | No | No | Yes | ENSMUSG00000042961                          | Egflam                   | EGF-like, fibronectin type III and laminin G domains                                                           | upstream mmu-mir-1898     |
| 1       | 171386341 | 171386918 | 578 | 186   | Yes              | No | No | Yes | ENSMUSG00000058622                          | Gm5265                   | predicted pseudogene 5265                                                                                      | downstream mmu-mir-214    |
| 2       | 31283794  | 31284116  | 323 | 2167  | Yes              | No | No | Yes | ENSMUSG00000076441 //<br>ENSMUSG00000055632 | Ass1 // Hmcn2            | arginine succinate synthetase 1 // hemicentin 2                                                                | downstream mmu-mir-3089   |
| 5       | 3597766   | 3598151   | 386 | 2955  | Yes              | No | No | Yes | ENSMUSG00000040302 //<br>ENSMUSG00000005907 | C030048B08Rik //<br>Pex1 | RIKEN cDNA C030048B08 gene // peroxisomal biogenesis factor 1                                                  | upstream mmu-mir-879      |
| 13      | 93344528  | 93344898  | 371 | 1057  | Yes              | No | No | Yes | ENSMUSG00000046957                          | Spz1                     | spermatogenic leucine zipper 1                                                                                 | upstream mmu-mir-5624     |
| 14      | 26694148  | 26694447  | 300 | 1141  | Yes              | No | No | Yes | ENSMUSG00000052323 //<br>ENSMUSG00000021866 | --- // Anxa11            | NA // annexin A11                                                                                              | downstream mmu-mir-3075   |
| 13      | 115756459 | 115756663 | 205 | 1119  | Yes              | No | No | Yes | ENSMUSG00000015533 //<br>ENSMUSG00000042284 | Itga2 // Itga1           | integrin alpha 2 // integrin alpha 1                                                                           | downstream mmu-mir-449a   |
| 8       | 113571557 | 113571907 | 351 | 3885  | Yes              | No | No | Yes | ENSMUSG00000080049 //<br>ENSMUSG00000031960 | --- // Aars              | NA // alanyl-tRNA synthetase                                                                                   | upstream mmu-mir-3473d    |
| 7       | 28833208  | 28833515  | 308 | 3498  | Yes              | No | No | Yes | ENSMUSG00000030603                          | Psmc4                    | proteasome (prosome, macropain) 26S subunit, ATPase, 4                                                         | downstream mmu-mir-1191   |
| 7       | 20380218  | 20380383  | 166 | 3481  | Yes              | No | No | Yes | ENSMUSG00000040525                          | Cblc                     | Casitas B-lineage lymphoma c                                                                                   | downstream mmu-mir-343    |
| 14      | 80984313  | 80984631  | 319 | 1273  | Yes              | No | No | Yes | ENSMUSG00000022026                          | Olfm4                    | olfactomedin 4                                                                                                 | downstream mmu-mir-759    |

## Supplementary Table 2

Enriched annotation term clusters of differentially methylated regions (DMRs) in the hippocampus of female *5-Htt+/-* and *5-Htt+/+* mice, exposed to prenatal stress (PS) or not (control, C). Clusters identified by Functional Annotation Clustering using DAVID. Score = enrichment score, FE = fold enrichment. Term with scores higher than 1.3 were considered enriched. G = genotype, E = environment, GxE = gene x environment interaction.

| Cluster                                          | Score | Category        | Enrichment Term                         | # Genes | % Genes | p    | FE   |
|--------------------------------------------------|-------|-----------------|-----------------------------------------|---------|---------|------|------|
| <b>A) G-effects: 5-Htt+/+ vs 5-Htt+/-</b>        |       |                 |                                         |         |         |      |      |
| 1                                                | 1,37  | SP_PIR_KEYWORDS | ribosomal protein                       | 8       | 2,87    | 0,01 | 3,67 |
|                                                  |       | GOTERM_CC_FAT   | GO:0005840~ribosome                     | 8       | 2,87    | 0,01 | 3,52 |
|                                                  |       |                 | GO:0003735~structural constituent of    |         |         |      |      |
|                                                  |       | GOTERM_MF_FAT   | ribosome                                | 7       | 2,51    | 0,01 | 3,83 |
|                                                  |       | GOTERM_CC_FAT   | GO:0030529~ribonucleoprotein complex    | 11      | 3,94    | 0,05 | 2,01 |
|                                                  |       | GOTERM_BP_FAT   | GO:0006412~translation                  | 8       | 2,87    | 0,09 | 2,10 |
|                                                  |       | GOTERM_MF_FAT   | GO:0005198~structural molecule activity | 10      | 3,58    | 0,09 | 1,83 |
|                                                  |       | SP_PIR_KEYWORDS | ribonucleoprotein                       | 6       | 2,15    | 0,23 | 1,83 |
|                                                  |       | KEGG_PATHWAY    | mmu03010:Ribosome                       | 3       | 1,08    | 0,30 | 2,72 |
| 2                                                | 1,34  | GOTERM_MF_FAT   | GO:0043167~ion binding                  | 61      | 21,86   | 0,02 | 1,28 |
|                                                  |       | GOTERM_MF_FAT   | GO:0043169~cation binding               | 60      | 21,51   | 0,02 | 1,27 |
|                                                  |       | GOTERM_MF_FAT   | GO:0046872~metal ion binding            | 59      | 21,15   | 0,03 | 1,26 |
|                                                  |       | SP_PIR_KEYWORDS | zinc-finger                             | 23      | 8,24    | 0,04 | 1,55 |
|                                                  |       | GOTERM_MF_FAT   | GO:0008270~zinc ion binding             | 34      | 12,19   | 0,06 | 1,33 |
|                                                  |       | SP_PIR_KEYWORDS | metal-binding                           | 42      | 15,05   | 0,08 | 1,27 |
|                                                  |       | GOTERM_MF_FAT   | GO:0046914~transition metal ion binding | 40      | 14,34   | 0,08 | 1,27 |
|                                                  |       | SP_PIR_KEYWORDS | zinc                                    | 30      | 10,75   | 0,12 | 1,29 |
| <b>B) E-effects: Controls vs Prenatal stress</b> |       |                 |                                         |         |         |      |      |
| 1                                                | 2,06  | INTERPRO        | IPR019775:WD40 repeat, conserved site   | 13      | 3,24    | 0,00 | 2,94 |
|                                                  |       | SP_PIR_KEYWORDS | wd repeat                               | 13      | 3,24    | 0,00 | 2,84 |
|                                                  |       | UP_SEQ_FEATURE  | repeat:WD 3                             | 12      | 2,99    | 0,00 | 2,87 |
|                                                  |       | UP_SEQ_FEATURE  | repeat:WD 1                             | 12      | 2,99    | 0,00 | 2,82 |
|                                                  |       | UP_SEQ_FEATURE  | repeat:WD 2                             | 12      | 2,99    | 0,00 | 2,82 |
|                                                  |       | INTERPRO        | IPR017986:WD40 repeat, region           | 11      | 2,74    | 0,01 | 2,82 |
|                                                  |       | UP_SEQ_FEATURE  | repeat:WD 4                             | 11      | 2,74    | 0,01 | 2,79 |
|                                                  |       | UP_SEQ_FEATURE  | repeat:WD 6                             | 9       | 2,24    | 0,01 | 3,09 |
|                                                  |       | UP_SEQ_FEATURE  | repeat:WD 5                             | 10      | 2,49    | 0,01 | 2,73 |
|                                                  |       | INTERPRO        | IPR019782:WD40 repeat 2                 | 10      | 2,49    | 0,01 | 2,73 |
|                                                  |       | INTERPRO        | IPR001680:WD40 repeat                   | 11      | 2,74    | 0,01 | 2,48 |
|                                                  |       | INTERPRO        | IPR019781:WD40 repeat, subgroup         | 10      | 2,49    | 0,02 | 2,49 |
|                                                  |       | UP_SEQ_FEATURE  | repeat:WD 7                             | 7       | 1,75    | 0,02 | 3,12 |
|                                                  |       | SMART           | SM00320:WD40                            | 11      | 2,74    | 0,04 | 2,07 |
|                                                  |       | INTERPRO        | IPR015943:WD40/YVTN repeat-like         | 10      | 2,49    | 0,08 | 1,92 |
| 2                                                | 1,77  | SP_PIR_KEYWORDS | sh3 domain                              | 10      | 2,49    | 0,01 | 2,81 |
|                                                  |       | INTERPRO        | IPR001452:Src homology-3 domain         | 10      | 2,49    | 0,01 | 2,77 |
|                                                  |       | SMART           | SM00326:SH3                             | 10      | 2,49    | 0,03 | 2,31 |
|                                                  |       | UP_SEQ_FEATURE  | domain:SH3                              | 8       | 2,00    | 0,03 | 2,71 |

|                                               |      |                 |                                                         |    |       |      |       |
|-----------------------------------------------|------|-----------------|---------------------------------------------------------|----|-------|------|-------|
| 3                                             | 1,72 | GOTERM_CC_FAT   | GO:0030017~sarcomere                                    | 6  | 1,50  | 0,01 | 4,38  |
|                                               |      | GOTERM_CC_FAT   | GO:0031674~I band                                       | 5  | 1,25  | 0,01 | 5,51  |
|                                               |      | GOTERM_CC_FAT   | GO:0044449~contractile fiber part                       | 6  | 1,50  | 0,02 | 4,08  |
|                                               |      | GOTERM_CC_FAT   | GO:0030016~myofibril                                    | 6  | 1,50  | 0,02 | 3,85  |
|                                               |      | GOTERM_CC_FAT   | GO:0043292~contractile fiber                            | 6  | 1,50  | 0,02 | 3,69  |
|                                               |      | GOTERM_CC_FAT   | GO:0030018~Z disc                                       | 4  | 1,00  | 0,04 | 5,08  |
| 4                                             | 1,47 | SP_PIR_KEYWORDS | tpr repeat                                              | 9  | 2,24  | 0,00 | 3,66  |
|                                               |      | INTERPRO        | IPR011990:Tetratricopeptide-like helical                | 9  | 2,24  | 0,00 | 3,51  |
|                                               |      | UP_SEQ_FEATURE  | repeat:TPR 3                                            | 8  | 2,00  | 0,01 | 3,75  |
|                                               |      | UP_SEQ_FEATURE  | repeat:TPR 1                                            | 8  | 2,00  | 0,01 | 3,40  |
|                                               |      | UP_SEQ_FEATURE  | repeat:TPR 2                                            | 8  | 2,00  | 0,01 | 3,40  |
|                                               |      | INTERPRO        | IPR013026:Tetratricopeptide region                      | 7  | 1,75  | 0,01 | 3,59  |
|                                               |      | UP_SEQ_FEATURE  | repeat:TPR 5                                            | 5  | 1,25  | 0,02 | 4,53  |
|                                               |      | UP_SEQ_FEATURE  | repeat:TPR 10                                           | 3  | 0,75  | 0,03 | 11,05 |
|                                               |      | UP_SEQ_FEATURE  | repeat:TPR 9                                            | 3  | 0,75  | 0,06 | 7,53  |
|                                               |      | UP_SEQ_FEATURE  | repeat:TPR 4                                            | 5  | 1,25  | 0,06 | 3,37  |
|                                               |      | UP_SEQ_FEATURE  | repeat:TPR 6                                            | 4  | 1,00  | 0,08 | 4,02  |
|                                               |      | INTERPRO        | IPR019734:Tetratricopeptide repeat                      | 5  | 1,25  | 0,12 | 2,61  |
|                                               |      | UP_SEQ_FEATURE  | repeat:TPR 8                                            | 3  | 0,75  | 0,15 | 4,36  |
|                                               |      | SMART           | SM00028:TPR                                             | 5  | 1,25  | 0,19 | 2,18  |
|                                               |      | INTERPRO        | IPR001440:Tetratricopeptide TPR-1                       | 4  | 1,00  | 0,22 | 2,46  |
|                                               |      | UP_SEQ_FEATURE  | repeat:TPR 7                                            | 3  | 0,75  | 0,22 | 3,38  |
| 5                                             | 1,31 | INTERPRO        | IPR001849:Pleckstrin homology                           | 11 | 2,74  | 0,01 | 2,46  |
|                                               |      | SMART           | SM00233:PH                                              | 11 | 2,74  | 0,04 | 2,06  |
|                                               |      | INTERPRO        | IPR011993:Pleckstrin homology-type                      | 10 | 2,49  | 0,06 | 2,02  |
|                                               |      | UP_SEQ_FEATURE  | domain:PH                                               | 7  | 1,75  | 0,16 | 1,91  |
| <b>C) GxE-effects: 5-Htt x PS interaction</b> |      |                 |                                                         |    |       |      |       |
| 1                                             | 2,14 | GOTERM_CC_FAT   | GO:0043232~intracellular non-membrane-bounded organelle | 38 | 13,43 | 0,00 | 1,63  |
|                                               |      | GOTERM_CC_FAT   | GO:0043228~non-membrane-bounded organelle               | 38 | 13,43 | 0,00 | 1,63  |
|                                               |      | GOTERM_CC_FAT   | GO:0005856~cytoskeleton                                 | 25 | 8,83  | 0,00 | 1,83  |
|                                               |      | GOTERM_CC_FAT   | GO:0044430~cytoskeletal part                            | 18 | 6,36  | 0,01 | 1,91  |
|                                               |      | GOTERM_CC_FAT   | GO:0015630~microtubule cytoskeleton                     | 10 | 3,53  | 0,09 | 1,83  |
| 2                                             | 1,74 | SP_PIR_KEYWORDS | hydroxylation                                           | 6  | 2,12  | 0,00 | 7,79  |
|                                               |      | INTERPRO        | IPR008160:Collagen triple helix repeat                  | 4  | 1,41  | 0,08 | 4,06  |
|                                               |      | SP_PIR_KEYWORDS | collagen                                                | 4  | 1,41  | 0,08 | 3,95  |
| 3                                             | 1,72 | GOTERM_MF_FAT   | GO:0030246~carbohydrate binding                         | 11 | 3,89  | 0,01 | 2,81  |
|                                               |      | GOTERM_MF_FAT   | GO:0005529~sugar binding                                | 8  | 2,83  | 0,01 | 3,58  |
|                                               |      | SP_PIR_KEYWORDS | Lectin                                                  | 7  | 2,47  | 0,02 | 3,48  |
|                                               |      | UP_SEQ_FEATURE  | domain:Ricin B-type lectin                              | 3  | 1,06  | 0,03 | 10,71 |
|                                               |      | INTERPRO        | IPR000772:Ricin B lectin                                | 3  | 1,06  | 0,04 | 8,81  |
|                                               |      | SMART           | SM00458:RICIN                                           | 3  | 1,06  | 0,05 | 8,15  |
| 4                                             | 1,71 | GOTERM_BP_FAT   | GO:0030029~actin filament-based process                 | 8  | 2,83  | 0,01 | 3,57  |

|   |      |                 |                                                                      |   |      |      |      |
|---|------|-----------------|----------------------------------------------------------------------|---|------|------|------|
|   |      | GOTERM_BP_FAT   | GO:0030036~actin cytoskeleton organization                           | 7 | 2,47 | 0,02 | 3,33 |
|   |      | GOTERM_BP_FAT   | GO:0007010~cytoskeleton organization                                 | 9 | 3,18 | 0,06 | 2,17 |
| 5 | 1,69 | INTERPRO        | IPR006209:EGF                                                        | 8 | 2,83 | 0,00 | 5,14 |
|   |      | INTERPRO        | IPR000152:EGF-type aspartate/asparagine hydroxylation conserved site | 6 | 2,12 | 0,01 | 5,25 |
|   |      | INTERPRO        | IPR000742:EGF-like, type 3                                           | 8 | 2,83 | 0,01 | 3,31 |
|   |      | INTERPRO        | IPR006210:EGF-like                                                   | 8 | 2,83 | 0,01 | 3,24 |
|   |      | SMART           | SM00181:EGF                                                          | 8 | 2,83 | 0,02 | 3,00 |
|   |      | SP_PIR_KEYWORDS | egf-like domain                                                      | 8 | 2,83 | 0,02 | 2,99 |
|   |      | INTERPRO        | IPR001881:EGF-like calcium-binding                                   | 5 | 1,77 | 0,02 | 4,52 |
|   |      | INTERPRO        | IPR018097:EGF-like calcium-binding, conserved site                   | 5 | 1,77 | 0,03 | 4,37 |
|   |      | SMART           | SM00179:EGF_CA                                                       | 5 | 1,77 | 0,03 | 4,18 |
|   |      | INTERPRO        | IPR013032:EGF-like region, conserved site                            | 9 | 3,18 | 0,04 | 2,39 |
|   |      | INTERPRO        | IPR013091:EGF calcium-binding                                        | 4 | 1,41 | 0,05 | 4,77 |
|   |      | UP_SEQ_FEATURE  | domain:EGF-like 2                                                    | 4 | 1,41 | 0,08 | 3,98 |
|   |      | UP_SEQ_FEATURE  | domain:EGF-like 1                                                    | 4 | 1,41 | 0,15 | 2,96 |

### Supplementary Table 3

Overview of the behavioral effects that we assessed in the same animals as used for the gene expression and DNA methylation study (published previously, Van den Hove & Jakob 2011, PLOS One<sup>4</sup>). FST = forced swim test, EZM = elevated zero maze, ORT = object recognition test, CORT = corticosterone levels. For details, see <sup>4</sup> in the references of the main text.

|                                     | <b>G</b> | <b>E</b> | <b>GxE</b> |
|-------------------------------------|----------|----------|------------|
| <b>FST, distance moved</b>          | =        | ↓        | =          |
| <b>EZM, time spent in open arms</b> | ↑        | =        | =          |
| <b>EZM, distance moved</b>          | =        | ↓        | =          |
| <b>ORT, 2h</b>                      | =        | ↓        | =          |
| <b>ORT, 3h</b>                      | ↑        | =        | =          |
| <b>CORT baseline</b>                | ↓        | =        | =          |
| <b>CORT stress</b>                  | =        | =        | =          |
| <b>CORT recovery</b>                | =        | =        | =          |
| <b>Adrenal weight</b>               | ↑        | =        | =          |



#### Supplementary Table 4

Clusters of highly correlating genes identified using Modulatory Modularity Cluster (MMC) analysis on differentially expressed myelin-associated genes in the hippocampus of female 5-*Htt*<sup>+/-</sup> and 5-*Htt*<sup>+/+</sup> mice, exposed to prenatal stress (PS) or not (control, C). Average.Degree = average correlation of the cluster, Degree = correlation of single genes with the rest of the cluster. Clusters containing *myelin basic protein (Mbp)* are highlighted in orange.

| Module | Affy.ID      | Entry.Index | Average.Degree | Degree  | mgf.symbol |
|--------|--------------|-------------|----------------|---------|------------|
| 1      | 1440902_at   | 164         | 0.77156        | 0.81119 | Ernmn      |
| 1      | 1436578_at   | 147         | 0.77156        | 0.77972 | Ernmn      |
| 1      | 1456689_at   | 235         | 0.77156        | 0.72378 | Rnf10      |
| 2      | 1426639_a_at | 91          | 0.74126        | 0.83916 | Tcf7l2     |
| 2      | 1418815_at   | 22          | 0.74126        | 0.69231 | Cdh2       |
| 2      | 1450790_at   | 204         | 0.74126        | 0.69231 | Tg         |
| 3      | 1443837_x_at | 173         | 0.73846        | 0.80245 | Bcl2       |
| 3      | 1421241_at   | 41          | 0.73846        | 0.74126 | Ngfr       |
| 3      | 1419601_at   | 30          | 0.73846        | 0.73776 | Kcnj10     |
| 3      | 1433886_at   | 130         | 0.73846        | 0.73601 | Eif2b5     |
| 3      | 1438819_at   | 158         | 0.73846        | 0.67483 | Nab1       |
| 4      | 1450180_a_at | 198         | 0.73776        | 0.78555 | Rara       |
| 4      | 1431781_at   | 123         | 0.73776        | 0.75291 | Ypel1      |
| 4      | 1419415_a_at | 27          | 0.73776        | 0.70629 | Rarg       |
| 4      | 1450523_at   | 200         | 0.73776        | 0.70629 | Cntn2      |
| 5      | 1451961_a_at | 212         | 0.72734        | 0.83516 | Mbp        |
| 5      | 1426960_a_at | 94          | 0.72734        | 0.82168 | Fa2h       |
| 5      | 1450088_a_at | 195         | 0.72734        | 0.81269 | Mobp       |
| 5      | 1460219_at   | 246         | 0.72734        | 0.76474 | Mag        |
| 5      | 1421010_at   | 36          | 0.72734        | 0.75325 | Mobp       |
| 5      | 1424567_at   | 67          | 0.72734        | 0.75325 | Tspan2     |
| 5      | 1454722_at   | 224         | 0.72734        | 0.74525 | Pten       |
| 5      | 1432558_a_at | 126         | 0.72734        | 0.72478 | Mal        |
| 5      | 1419064_a_at | 25          | 0.72734        | 0.72378 | Ugt8a      |
| 5      | 1425467_a_at | 80          | 0.72734        | 0.70929 | Plp1       |
| 5      | 1454078_a_at | 220         | 0.72734        | 0.69081 | Gal3st1    |
| 5      | 1417551_at   | 13          | 0.72734        | 0.68731 | Cln3       |
| 5      | 1435166_at   | 139         | 0.72734        | 0.66234 | Cntn2      |
| 5      | 1422833_at   | 55          | 0.72734        | 0.64136 | Foxa2      |
| 5      | 1422068_at   | 46          | 0.72734        | 0.58442 | Pou3f1     |
| 6      | 1421048_a_at | 37          | 0.69231        | 0.79021 | Ypel1      |
| 6      | 1460180_at   | 245         | 0.69231        | 0.73427 | Hexb       |
| 6      | 1453977_at   | 218         | 0.69231        | 0.68065 | Exoc4      |
| 6      | 1450177_at   | 197         | 0.69231        | 0.5641  | Ngfr       |
| 7      | 1431782_s_at | 124         | 0.68741        | 0.79895 | Ypel1      |
| 7      | 1421678_at   | 42          | 0.68741        | 0.72028 | Itpr2      |
| 7      | 1450748_at   | 202         | 0.68741        | 0.71154 | Smpd3      |
| 7      | 1427693_at   | 103         | 0.68741        | 0.65035 | Itpr2      |
| 7      | 1436727_x_at | 149         | 0.68741        | 0.55594 | Sptlc1     |

|    |              |     |         |         |          |
|----|--------------|-----|---------|---------|----------|
| 8  | 1422994_at   | 58  | 0.6819  | 0.77078 | Pikfyve  |
| 8  | 1427206_at   | 95  | 0.6819  | 0.75758 | Afg3l2   |
| 8  | 1447874_x_at | 182 | 0.6819  | 0.7265  | Smpd1    |
| 8  | 1448710_at   | 184 | 0.6819  | 0.70319 | Cxcr4    |
| 8  | 1445360_at   | 177 | 0.6819  | 0.68765 | Tgfb1    |
| 8  | 1434538_x_at | 135 | 0.6819  | 0.65657 | Eif2b2   |
| 8  | 1419416_a_at | 28  | 0.6819  | 0.65579 | Rarg     |
| 8  | 1416990_at   | 5   | 0.6819  | 0.64413 | Rxbp1    |
| 8  | 1427207_s_at | 96  | 0.6819  | 0.64258 | Afg3l2   |
| 8  | 1419132_at   | 26  | 0.6819  | 0.5742  | Tlr2     |
| 9  | 1429530_a_at | 111 | 0.65501 | 0.73427 | Smpd4    |
| 9  | 1454773_at   | 225 | 0.65501 | 0.7296  | Rxra     |
| 9  | 1443011_at   | 172 | 0.65501 | 0.59907 | Prmt7    |
| 9  | 1422690_at   | 51  | 0.65501 | 0.55711 | Sptlc1   |
| 10 | 1451718_at   | 210 | 0.62987 | 0.73726 | Plp1     |
| 10 | 1437224_at   | 152 | 0.62987 | 0.6953  | Rtn4     |
| 10 | 1439989_at   | 161 | 0.62987 | 0.69231 | Tsc1     |
| 10 | 1426010_a_at | 87  | 0.62987 | 0.68232 | Epb4.1l3 |
| 10 | 1444117_at   | 174 | 0.62987 | 0.65734 | Amigo1   |
| 10 | 1455989_at   | 229 | 0.62987 | 0.64735 | Gjc2     |
| 10 | 1458408_at   | 240 | 0.62987 | 0.48651 | Samd8    |
| 10 | 1430650_at   | 118 | 0.62987 | 0.44056 | Zfp191   |
| 11 | 1435165_at   | 138 | 0.61993 | 0.76503 | Cntn2    |
| 11 | 1417275_at   | 9   | 0.61993 | 0.74452 | Mal      |
| 11 | 1419646_a_at | 31  | 0.61993 | 0.72214 | Mbp      |
| 11 | 1433785_at   | 129 | 0.61993 | 0.72121 | Mobp     |
| 11 | 1439506_at   | 159 | 0.61993 | 0.68625 | Myrf     |
| 11 | 1424568_at   | 68  | 0.61993 | 0.67086 | Tspan2   |
| 11 | 1427420_at   | 99  | 0.61993 | 0.67086 | Nkx6-2   |
| 11 | 1417133_at   | 8   | 0.61993 | 0.63263 | Pmp22    |
| 11 | 1418663_at   | 19  | 0.61993 | 0.62005 | Mpdz     |
| 11 | 1416999_at   | 6   | 0.61993 | 0.61585 | Smpd2    |
| 11 | 1440770_at   | 163 | 0.61993 | 0.61352 | Bcl2     |
| 11 | 1422686_s_at | 50  | 0.61993 | 0.59347 | Exoc4    |
| 11 | 1450655_at   | 201 | 0.61993 | 0.53613 | Pten     |
| 11 | 1444418_at   | 176 | 0.61993 | 0.45082 | Itpr2    |
| 11 | 1459020_at   | 241 | 0.61993 | 0.44942 | Amigo1   |
| 11 | 1416635_at   | 4   | 0.61993 | 0.42611 | Smpdl3a  |
| 12 | 1449244_at   | 190 | 0.61958 | 0.73951 | Cdh2     |
| 12 | 1423259_at   | 62  | 0.61958 | 0.68706 | Id4      |
| 12 | 1424838_at   | 71  | 0.61958 | 0.6486  | Ncmap    |
| 12 | 1426576_at   | 90  | 0.61958 | 0.58392 | Sgms1    |
| 12 | 1420653_at   | 34  | 0.61958 | 0.43881 | Tgfb1    |
| 13 | 1438454_at   | 155 | 0.56794 | 0.71284 | Pten     |
| 13 | 1418664_at   | 20  | 0.56794 | 0.71216 | Mpdz     |
| 13 | 1455728_at   | 228 | 0.56794 | 0.6993  | Pten     |
| 13 | 1448621_a_at | 183 | 0.56794 | 0.68306 | Smpd1    |
| 13 | 1419754_at   | 33  | 0.56794 | 0.67539 | Myo5a    |
| 13 | 1426896_at   | 93  | 0.56794 | 0.66704 | Zfp191   |
| 13 | 1421064_at   | 38  | 0.56794 | 0.66095 | Mpp5     |

|                 |             |         |          |
|-----------------|-------------|---------|----------|
| 13 1417624_at   | 15 0.56794  | 0.65847 | Nab1     |
| 13 1431320_a_at | 122 0.56794 | 0.65509 | Myo5a    |
| 13 1434954_at   | 137 0.56794 | 0.63321 | Mpp5     |
| 13 1422847_a_at | 56 0.56794  | 0.62711 | Prkcd    |
| 13 1416531_at   | 3 0.56794   | 0.61606 | Gsto1    |
| 13 1449940_a_at | 192 0.56794 | 0.61155 | Eif2b4   |
| 13 1452994_at   | 214 0.56794 | 0.60388 | Pikfyve  |
| 13 1425460_at   | 79 0.56794  | 0.60072 | Mtmr2    |
| 13 1442978_at   | 171 0.56794 | 0.59486 | Mpdz     |
| 13 1457493_at   | 237 0.56794 | 0.59328 | Pten     |
| 13 1460571_at   | 248 0.56794 | 0.58403 | Dicer1   |
| 13 1440595_at   | 162 0.56794 | 0.58313 | Epb4.1l3 |
| 13 1436205_at   | 144 0.56794 | 0.56801 | Nfasc    |
| 13 1453182_a_at | 215 0.56794 | 0.53643 | Smpd4    |
| 13 1450113_at   | 196 0.56794 | 0.52109 | Mpp5     |
| 13 1450928_at   | 206 0.56794 | 0.5062  | Id4      |
| 13 1426895_at   | 92 0.56794  | 0.5035  | Zfp191   |
| 13 1451248_at   | 209 0.56794 | 0.48928 | Prmt7    |
| 13 1455993_at   | 230 0.56794 | 0.48139 | Tenm4    |
| 13 1436051_at   | 142 0.56794 | 0.45883 | Myo5a    |
| 13 1430371_x_at | 115 0.56794 | 0.45319 | Eif2ak3  |
| 13 1439650_at   | 160 0.56794 | 0.45048 | Rtn4     |
| 13 1454903_at   | 226 0.56794 | 0.41642 | Ngfr     |
| 13 1423260_at   | 63 0.56794  | 0.39477 | Id4      |
| 13 1416412_at   | 2 0.56794   | 0.22242 | Nsmaf    |
| 14 1425947_at   | 86 0.52044  | 0.65113 | Ifng     |
| 14 1442253_at   | 169 0.52044 | 0.57187 | Erc2     |
| 14 1429428_at   | 110 0.52044 | 0.5641  | Tcf7l2   |
| 14 1425229_a_at | 75 0.52044  | 0.54545 | Tcf7l2   |
| 14 1429427_s_at | 109 0.52044 | 0.52991 | Tcf7l2   |
| 14 1425796_a_at | 84 0.52044  | 0.52525 | Fgfr3    |
| 14 1424834_s_at | 70 0.52044  | 0.47552 | Itpr2    |
| 14 1459209_at   | 242 0.52044 | 0.46154 | Rnf10    |
| 14 1453505_a_at | 216 0.52044 | 0.45921 | Eif2ak3  |
| 14 1450483_at   | 199 0.52044 | 0.42036 | Gjc2     |
| 15 1418212_at   | 18 0.5078   | 0.65697 | Omg      |
| 15 1437874_s_at | 154 0.5078  | 0.63047 | Hexb     |
| 15 1422042_at   | 44 0.5078   | 0.62275 | Gjc3     |
| 15 1445523_at   | 178 0.5078  | 0.60397 | Gjc3     |
| 15 1441964_at   | 167 0.5078  | 0.59919 | Qk       |
| 15 1430497_at   | 116 0.5078  | 0.58557 | Rxra     |
| 15 1419063_at   | 24 0.5078   | 0.5657  | Ugt8a    |
| 15 1433571_at   | 128 0.5078  | 0.56496 | Serinc5  |
| 15 1431101_a_at | 121 0.5078  | 0.56386 | Srd5a1   |
| 15 1421116_a_at | 39 0.5078   | 0.5587  | Rtn4     |
| 15 1457789_at   | 239 0.5078  | 0.55208 | Cln3     |
| 15 1422684_a_at | 48 0.5078   | 0.54693 | Exoc4    |
| 15 1454257_at   | 221 0.5078  | 0.44755 | Sptlc2   |
| 15 1422938_at   | 57 0.5078   | 0.4435  | Bcl2     |
| 15 1427287_s_at | 97 0.5078   | 0.43688 | Itpr2    |

|    |              |     |         |         |         |
|----|--------------|-----|---------|---------|---------|
| 15 | 1422685_at   | 49  | 0.5078  | 0.42657 | Exoc4   |
| 15 | 1456068_at   | 233 | 0.5078  | 0.40964 | Nfasc   |
| 15 | 1435937_at   | 141 | 0.5078  | 0.34855 | Sptlc2  |
| 15 | 1425468_at   | 81  | 0.5078  | 0.3191  | Plp1    |
| 15 | 1417300_at   | 11  | 0.5078  | 0.2731  | Smpdl3b |
| 16 | 1422779_at   | 53  | 0.50296 | 0.66525 | Smpd3   |
| 16 | 1421841_at   | 43  | 0.50296 | 0.62481 | Fgfr3   |
| 16 | 1456010_x_at | 231 | 0.50296 | 0.61204 | Hes5    |
| 16 | 1425264_s_at | 77  | 0.50296 | 0.61082 | Mbp     |
| 16 | 1429735_at   | 113 | 0.50296 | 0.59775 | Qk      |
| 16 | 1427682_a_at | 101 | 0.50296 | 0.59137 | Egr2    |
| 16 | 1455252_at   | 227 | 0.50296 | 0.5792  | Tsc1    |
| 16 | 1417839_at   | 16  | 0.50296 | 0.57708 | Cldn5   |
| 16 | 1449278_at   | 191 | 0.50296 | 0.55275 | Eif2ak3 |
| 16 | 1449024_a_at | 189 | 0.50296 | 0.55184 | Hexa    |
| 16 | 1427683_at   | 102 | 0.50296 | 0.54454 | Egr2    |
| 16 | 1423146_at   | 60  | 0.50296 | 0.49711 | Hes5    |
| 16 | 1451888_a_at | 211 | 0.50296 | 0.4959  | Tenm4   |
| 16 | 1429318_a_at | 108 | 0.50296 | 0.49438 | Qk      |
| 16 | 1438699_at   | 157 | 0.50296 | 0.47826 | Srd5a1  |
| 16 | 1437122_at   | 151 | 0.50296 | 0.47796 | Bcl2    |
| 16 | 1446974_at   | 180 | 0.50296 | 0.46732 | Pikfyve |
| 16 | 1429736_at   | 114 | 0.50296 | 0.44208 | Qk      |
| 16 | 1448781_at   | 186 | 0.50296 | 0.41745 | Nab1    |
| 16 | 1442256_at   | 170 | 0.50296 | 0.41593 | Prkcd   |
| 16 | 1441361_at   | 166 | 0.50296 | 0.37884 | Mpdz    |
| 16 | 1457687_at   | 238 | 0.50296 | 0.34813 | Bcl2    |
| 16 | 1423504_at   | 66  | 0.50296 | 0.33779 | Jam3    |
| 16 | 1418782_at   | 21  | 0.50296 | 0.31256 | Rxrg    |
| 17 | 1423102_a_at | 59  | 0.50157 | 0.65812 | Rnf10   |
| 17 | 1423221_at   | 61  | 0.50157 | 0.63015 | Tubb4a  |
| 17 | 1449942_a_at | 193 | 0.50157 | 0.62432 | Ilk     |
| 17 | 1427481_a_at | 100 | 0.50157 | 0.62393 | Atp1a3  |
| 17 | 1417930_at   | 17  | 0.50157 | 0.59207 | Nab2    |
| 17 | 1417456_at   | 12  | 0.50157 | 0.58042 | Gnpat   |
| 17 | 1448807_at   | 187 | 0.50157 | 0.57187 | Hrh3    |
| 17 | 1422553_at   | 47  | 0.50157 | 0.55556 | Pten    |
| 17 | 1417558_at   | 14  | 0.50157 | 0.54429 | Fyn     |
| 17 | 1430651_s_at | 119 | 0.50157 | 0.51943 | Zfp191  |
| 17 | 1429531_at   | 112 | 0.50157 | 0.50466 | Smpd4   |
| 17 | 1447811_s_at | 181 | 0.50157 | 0.49883 | Amigo1  |
| 17 | 1454649_at   | 222 | 0.50157 | 0.48912 | Srd5a1  |
| 17 | 1448945_at   | 188 | 0.50157 | 0.46698 | Plip    |
| 17 | 1423292_a_at | 64  | 0.50157 | 0.39122 | Prx     |
| 17 | 1453730_at   | 217 | 0.50157 | 0.38578 | Samd8   |
| 17 | 1434402_at   | 133 | 0.50157 | 0.36092 | Samd8   |
| 17 | 1425263_a_at | 76  | 0.50157 | 0.33411 | Mbp     |
| 17 | 1424833_at   | 69  | 0.50157 | 0.19814 | Itpr2   |
| 18 | 1430533_a_at | 117 | 0.49184 | 0.64248 | Ctnnb1  |
| 18 | 1438665_at   | 156 | 0.49184 | 0.57692 | Smpd3   |

|    |              |     |         |         |          |
|----|--------------|-----|---------|---------|----------|
| 18 | 1431062_a_at | 120 | 0.49184 | 0.50524 | Exoc4    |
| 18 | 1454003_at   | 219 | 0.49184 | 0.5     | Afg3l2   |
| 18 | 1460727_at   | 249 | 0.49184 | 0.49738 | Erc2     |
| 18 | 1450762_s_at | 203 | 0.49184 | 0.48077 | Zfp191   |
| 18 | 1450008_a_at | 194 | 0.49184 | 0.46241 | Ctnnb1   |
| 18 | 1426096_at   | 88  | 0.49184 | 0.41259 | Prmt7    |
| 18 | 1460038_at   | 244 | 0.49184 | 0.34878 | Pou3f1   |
| 19 | 1422043_at   | 45  | 0.48881 | 0.62587 | Tsc1     |
| 19 | 1421166_at   | 40  | 0.48881 | 0.5507  | Atrn     |
| 19 | 1425851_a_at | 85  | 0.48881 | 0.52622 | Amigo1   |
| 19 | 1424919_at   | 73  | 0.48881 | 0.42832 | Erbp2    |
| 19 | 1445908_at   | 179 | 0.48881 | 0.31294 | Eif2b5   |
| 20 | 1436726_s_at | 148 | 0.48298 | 0.62937 | Sptlc1   |
| 20 | 1456036_x_at | 232 | 0.48298 | 0.61259 | Gsto1    |
| 20 | 1425459_at   | 78  | 0.48298 | 0.47413 | Mtmt2    |
| 20 | 1426575_at   | 89  | 0.48298 | 0.4042  | Sgms1    |
| 20 | 1419577_at   | 29  | 0.48298 | 0.39441 | Fig4     |
| 20 | 1448765_at   | 185 | 0.48298 | 0.38322 | Fyn      |
| 21 | 1422691_at   | 52  | 0.48252 | 0.58508 | Sptlc1   |
| 21 | 1441308_at   | 165 | 0.48252 | 0.55594 | Mobp     |
| 21 | 1423503_at   | 65  | 0.48252 | 0.54895 | Jam3     |
| 21 | 1425061_at   | 74  | 0.48252 | 0.49068 | Wasf3    |
| 21 | 1436263_at   | 145 | 0.48252 | 0.47902 | Mobp     |
| 21 | 1456962_at   | 236 | 0.48252 | 0.47436 | Cntn2    |
| 21 | 1428995_at   | 106 | 0.48252 | 0.24359 | Smpd5    |
| 22 | 1436499_at   | 146 | 0.47226 | 0.59907 | Sgms1    |
| 22 | 1437024_at   | 150 | 0.47226 | 0.56255 | Smpd4    |
| 22 | 1434121_at   | 131 | 0.47226 | 0.55556 | Lgi4     |
| 22 | 1451136_a_at | 207 | 0.47226 | 0.48329 | Eif2b2   |
| 22 | 1419722_at   | 32  | 0.47226 | 0.46387 | Klk8     |
| 22 | 1428663_at   | 105 | 0.47226 | 0.44522 | Sgms2    |
| 22 | 1424856_at   | 72  | 0.47226 | 0.43434 | Atp1a3   |
| 22 | 1460243_at   | 247 | 0.47226 | 0.4289  | Sptlc2   |
| 22 | 1437428_x_at | 153 | 0.47226 | 0.40171 | Eif2b2   |
| 22 | 1429029_at   | 107 | 0.47226 | 0.3481  | Sgms2    |
| 23 | 1433532_a_at | 127 | 0.4334  | 0.6014  | Mbp      |
| 23 | 1420811_a_at | 35  | 0.4334  | 0.5609  | Ctnnb1   |
| 23 | 1456228_x_at | 234 | 0.4334  | 0.5574  | Mbp      |
| 23 | 1419062_at   | 23  | 0.4334  | 0.55274 | Epb4.1l3 |
| 23 | 1425762_a_at | 83  | 0.4334  | 0.55099 | Rxra     |
| 23 | 1434530_at   | 134 | 0.4334  | 0.53001 | Tenm4    |
| 23 | 1459357_at   | 243 | 0.4334  | 0.52069 | Nfasc    |
| 23 | 1436201_x_at | 143 | 0.4334  | 0.50262 | Mbp      |
| 23 | 1416232_at   | 1   | 0.4334  | 0.49767 | Olig2    |
| 23 | 1450803_at   | 205 | 0.4334  | 0.48164 | Ntf3     |
| 23 | 1417073_a_at | 7   | 0.4334  | 0.46941 | Qk       |
| 23 | 1452649_at   | 213 | 0.4334  | 0.44435 | Rtn4     |
| 23 | 1435214_at   | 140 | 0.4334  | 0.44231 | Gjc2     |
| 23 | 1427941_at   | 104 | 0.4334  | 0.43269 | Dicer1   |
| 23 | 1434197_at   | 132 | 0.4334  | 0.41725 | Atrn     |

|    |              |     |        |         |        |
|----|--------------|-----|--------|---------|--------|
| 23 | 1451179_a_at | 208 | 0.4334 | 0.40793 | Qk     |
| 23 | 1434802_s_at | 136 | 0.4334 | 0.39277 | Ntf3   |
| 23 | 1422810_at   | 54  | 0.4334 | 0.36888 | Zfp191 |
| 23 | 1427373_at   | 98  | 0.4334 | 0.35606 | Amigo1 |
| 23 | 1432417_a_at | 125 | 0.4334 | 0.32488 | Tspan2 |
| 23 | 1454651_x_at | 223 | 0.4334 | 0.32197 | Mbp    |
| 23 | 1444243_at   | 175 | 0.4334 | 0.30828 | Wasf3  |
| 23 | 1442079_at   | 168 | 0.4334 | 0.29516 | Sgms1  |
| 23 | 1425597_a_at | 82  | 0.4334 | 0.28497 | Qk     |
| 23 | 1417297_at   | 10  | 0.4334 | 0.21212 | Itpr3  |
